# Supplementary material for: Multiple Lineages of Ancient CR1 Retroposons Shaped the Early Genome Evolution of Amniotes
Source: PubMed Central journal article supplement (PMC4316615; doi:10.1093/gbe/evu256), 2014-12-11
Supplement: supp_evu256_Suh_CR1_supplements.pdf [file supp_evu256_Suh_CR1_supplements.pdf]

# Supplementary Information

A

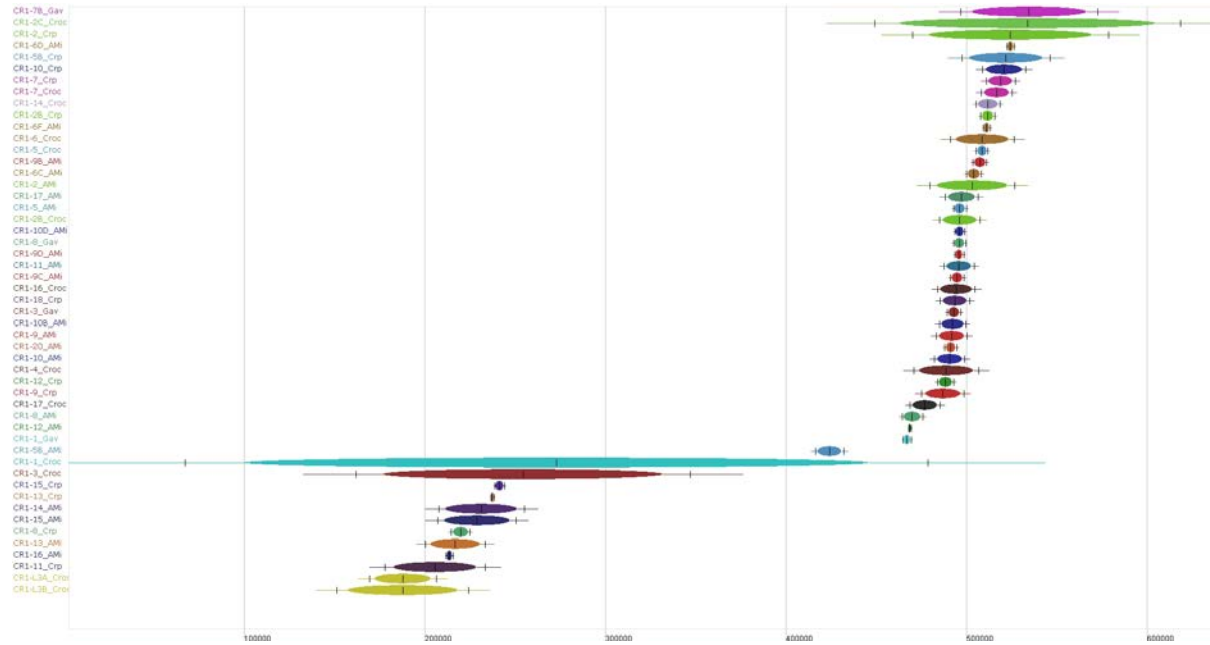

B

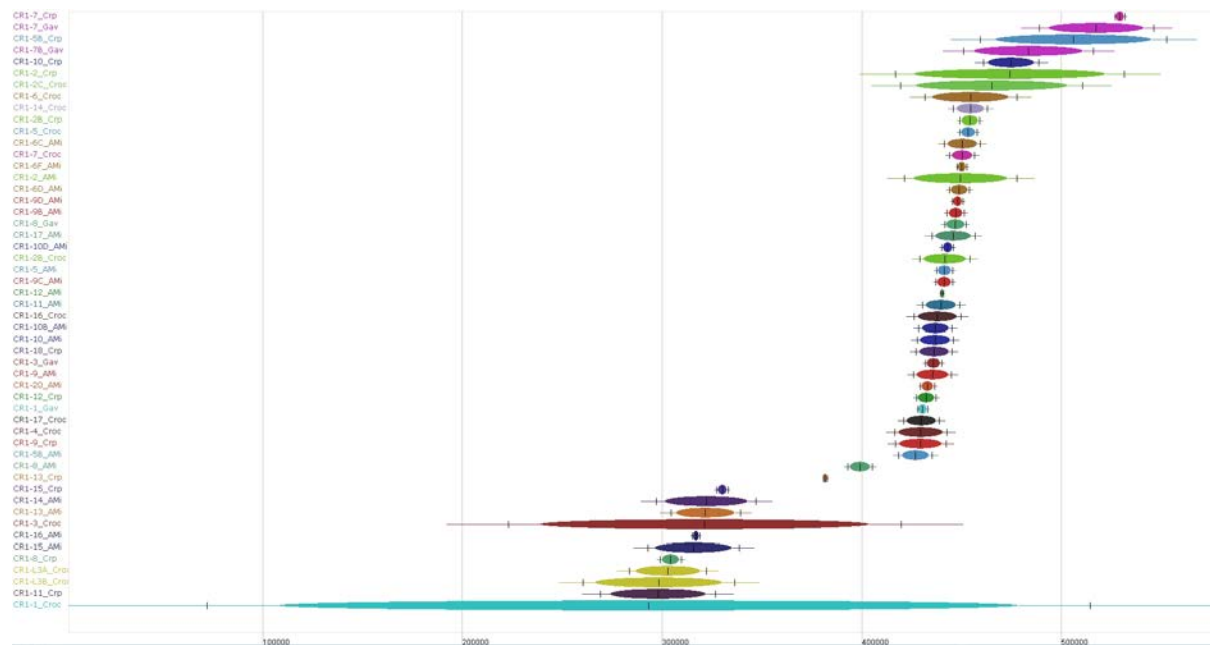

**Fig. S1. TinT patterns of unmerged CR1 subfamilies within four crocodylian genomes.** The transposition in transposition graphs from (A) saltwater crocodile, (B) gharial, (C) Chinese alligator, and (D) American alligator correspond to the computational estimates of CR1 activity in fig. 2A, but comprise all unmerged CR1 subfamily sequences from fig. 3.

C

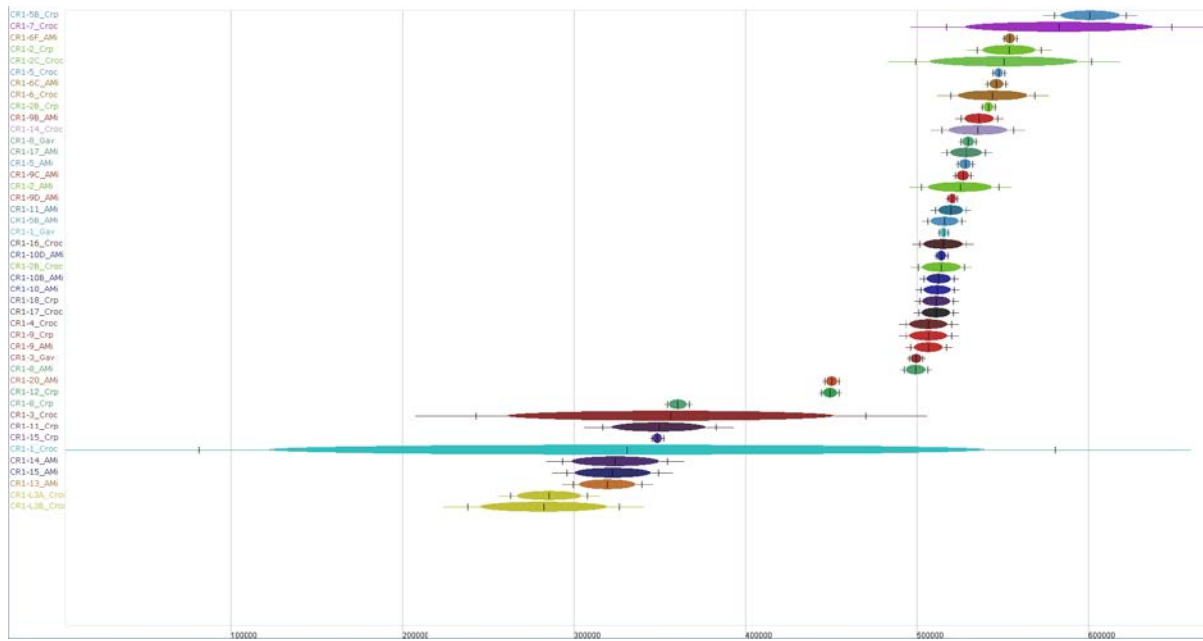

D

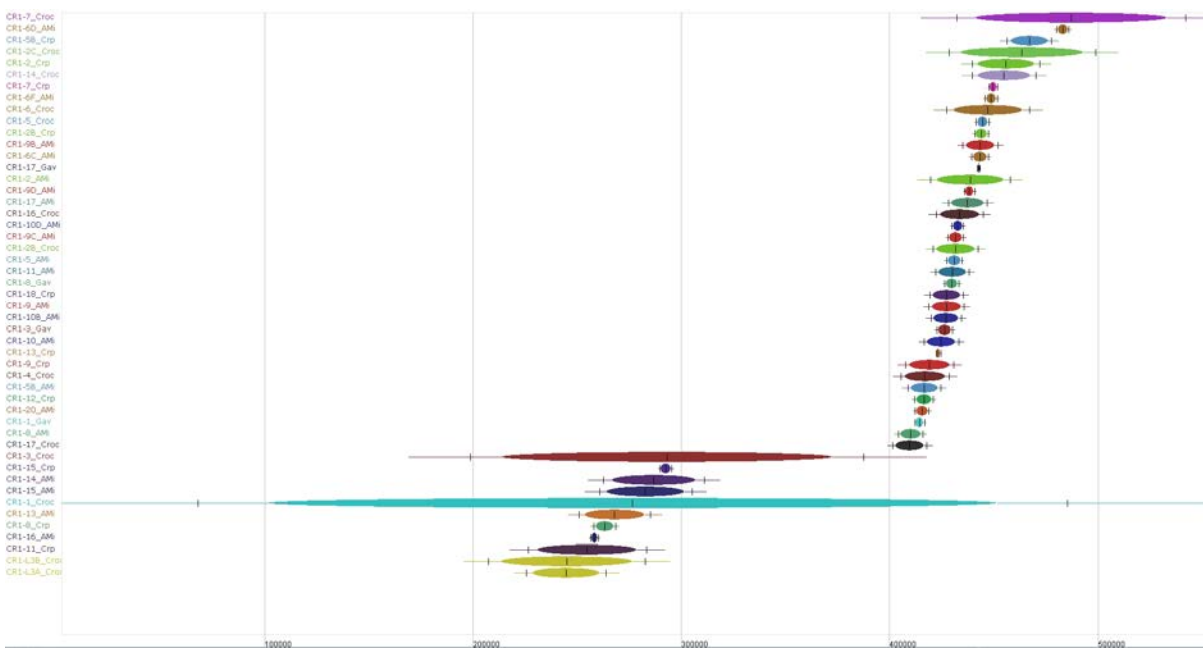

Fig. S1. Continued.

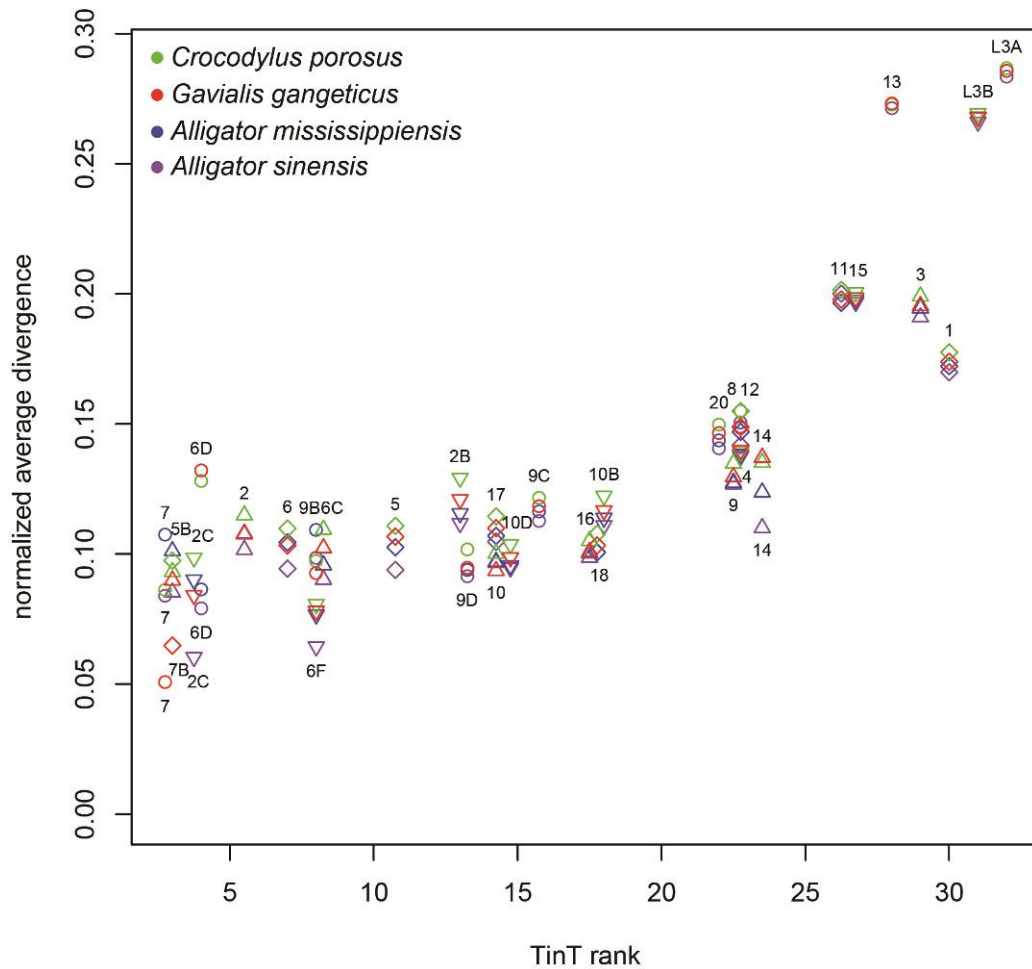

**Fig. S2. Average divergence among CR1 subfamilies within four crocodilian genomes.** While most CR1 subfamilies exhibit similar average divergences, a few (e.g., CR1-7) show variation between the Saltwater crocodile, gharial, American alligator, and Chinese alligator, suggesting lineage-specific differences in activity as also indicated by fig. 2. Note that the divergence value of each CR1 insertion was normalized for the length of the insertion. The TinT rank is derived from the computational estimation of activity successions of CR1 subfamilies in the transposition in transposition model, wherein recent retropositional activity is reflected by a low TinT rank.

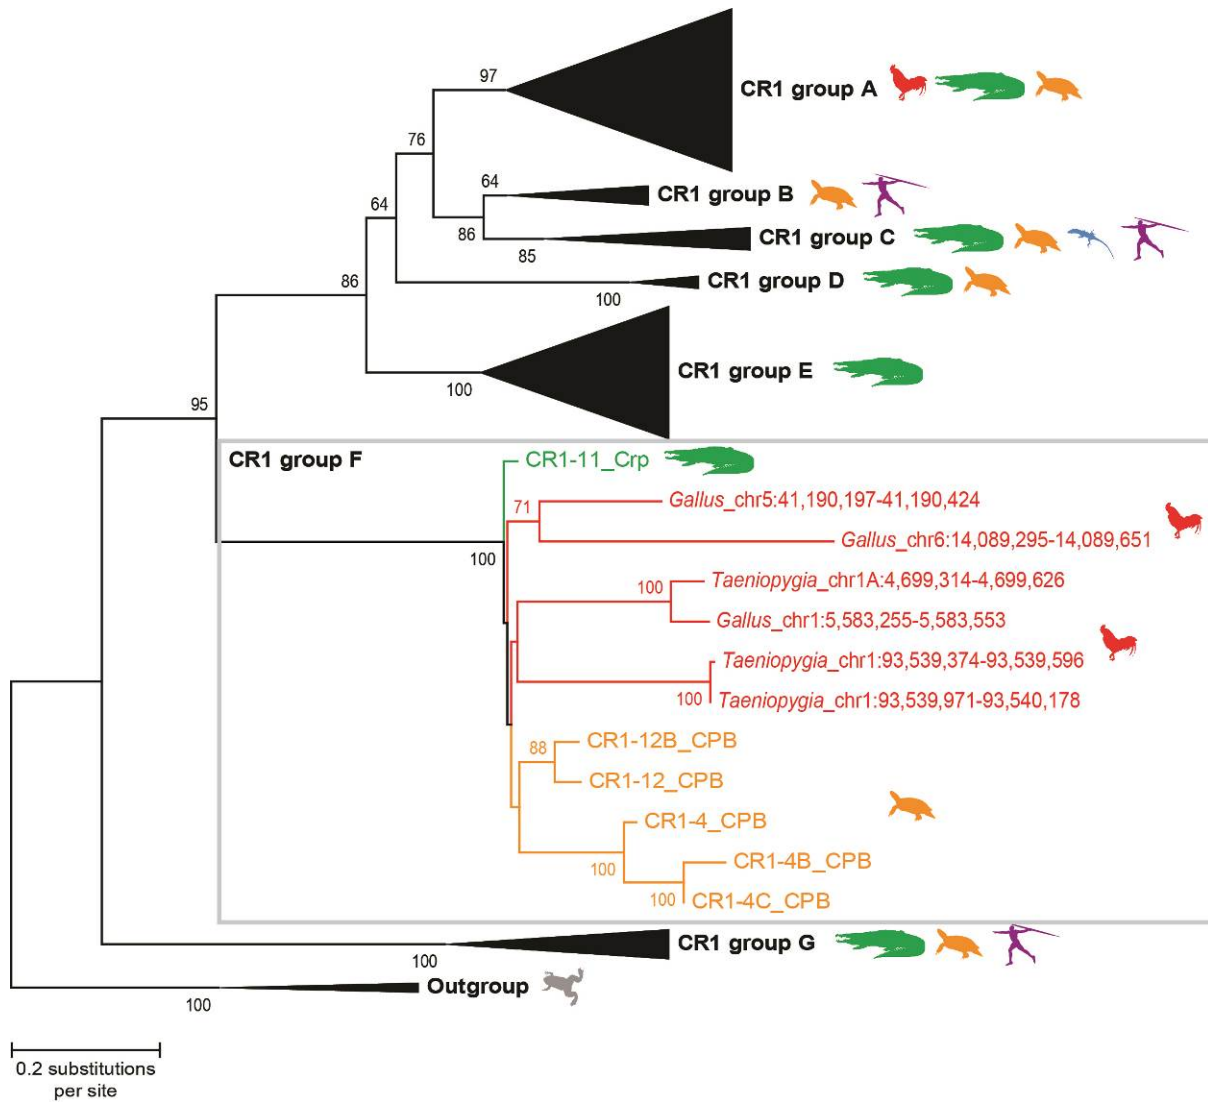

**Fig. S3. Low copy number of CR1 group F-like elements in bird genomes.** Maximum likelihood nucleotide sequence analysis of the same data set as in fig. 3, but including all BLASTn hits (representatives from crocodylian/turtle CR1 groups B–G as queries, no cutoff e-value, hits >200 bp) from chicken and zebra finch genomes. Unlabeled nodes received a bootstrap support of <50%.

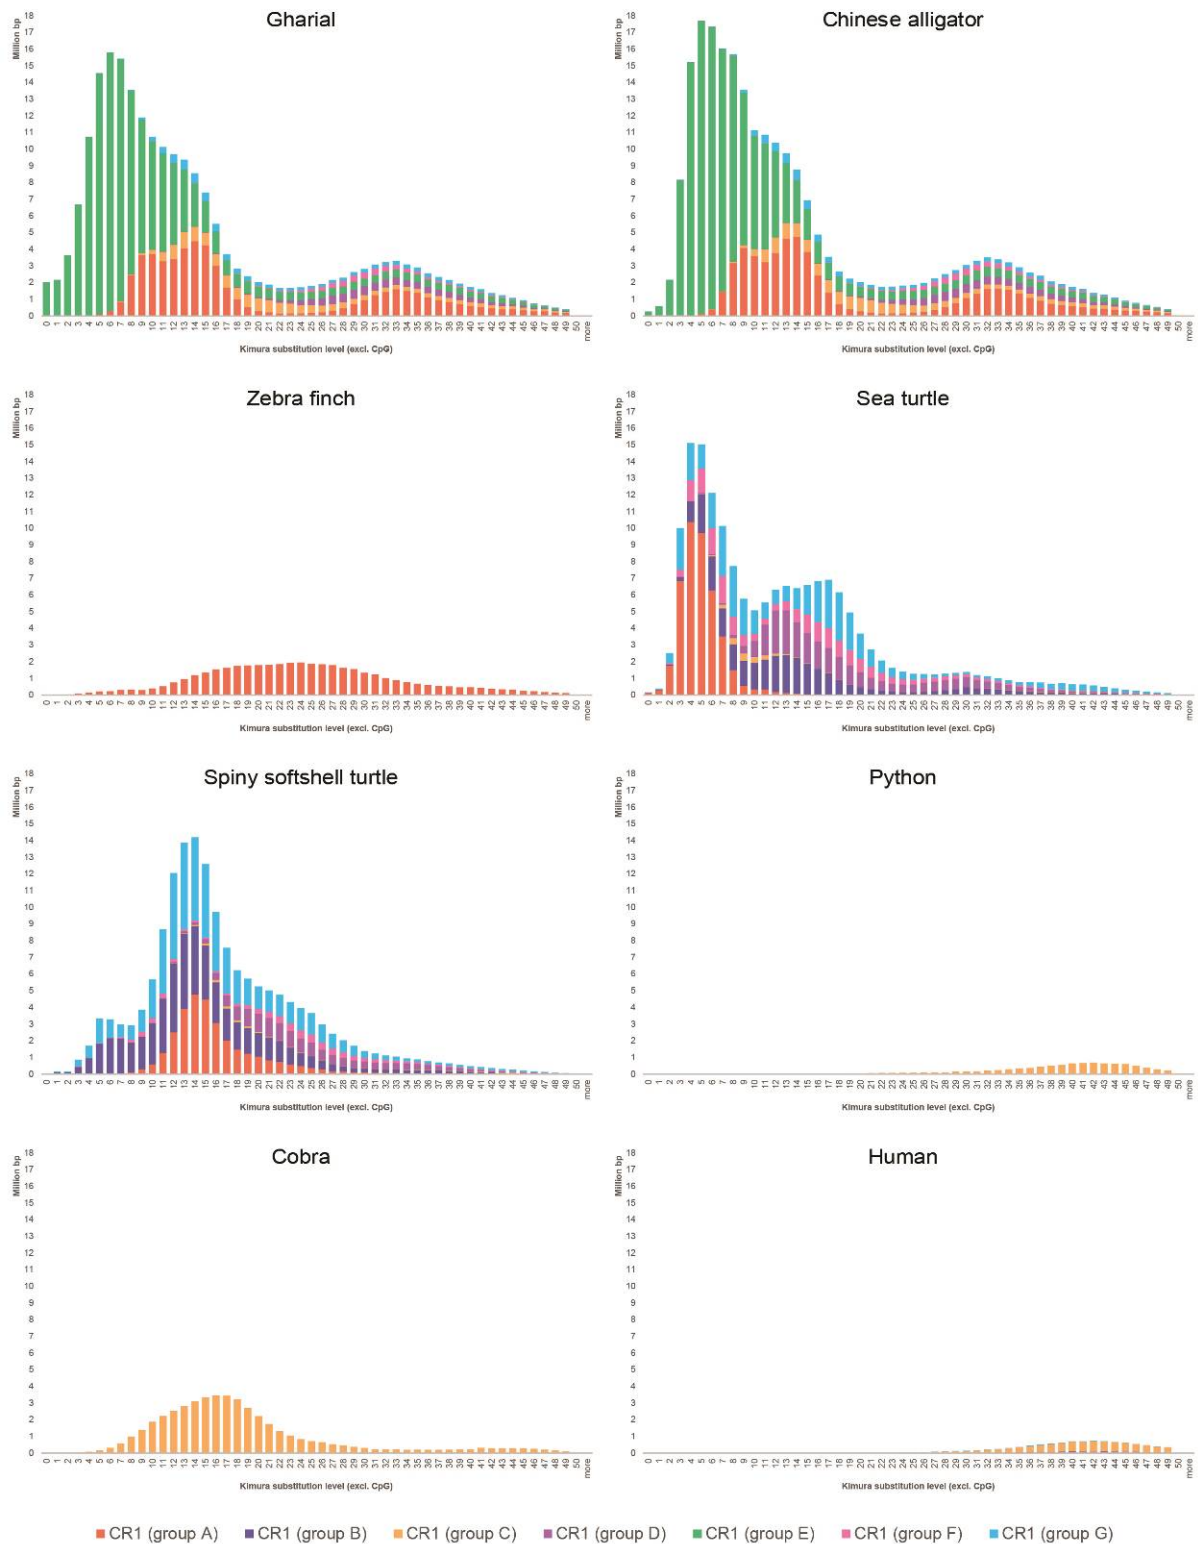

**Fig. S4. CR1 divergence landscape plots of amniote genomes not shown in fig. 4.** Definitions of CR1 groups A–G correspond to fig. 3 and divergences of CR1 copies to their respective consensus sequences were calculated excluding CpG dinucleotide sites.

**Table S1. Presence/absence of RE markers among orthologous loci in crocodylian genomes.**

| marker  | <i>Cr. porosus</i> | <i>Cr. palustris</i> | <i>Cr. niloticus</i> | <i>Cr. mindoensis</i> | <i>Cr. novaeguineae</i> | <i>Cr. johnstoni</i> | <i>Os. tetraspis</i> | <i>Me. cataphractus</i> | <i>To. schlegelii</i> | <i>Ga. gangeticus</i> | <i>Ca. yacare</i> | <i>Me. niger</i> | <i>Pa. palpebrosus</i> | <i>Al. sinensis</i> | <i>Al. mississippiensis</i> | RE subfamily   | target site duplication | comments |
|---------|--------------------|----------------------|----------------------|-----------------------|-------------------------|----------------------|----------------------|-------------------------|-----------------------|-----------------------|-------------------|------------------|------------------------|---------------------|-----------------------------|----------------|-------------------------|----------|
| AM02    | -                  |                      |                      |                       |                         |                      |                      |                         | ?                     | -                     | +                 | +                | +                      | +                   | +                           | Penelope-1_Crp | TTTCAG                  | *        |
| AM05    | -                  |                      |                      |                       |                         |                      |                      |                         | -                     | -                     | -                 | -                | -                      | +                   | +                           | Penelope-1_Crp | TGCATCAGTG              |          |
| AM06    | -                  |                      |                      |                       |                         |                      |                      |                         | -                     | -                     | +                 | +                | +                      | +                   | +                           | CR1-7_Croc     | GTT                     |          |
| AM07    | -                  |                      |                      |                       |                         |                      |                      |                         | -                     | -                     | -                 | -                | -                      | +                   | +                           | CR1-7_Croc     | AACTT                   |          |
| AM09    | -                  |                      |                      |                       |                         |                      |                      |                         | -                     | -                     | -                 | -                | -                      | -                   | +                           | CR1-7_Croc     | TT                      | **       |
| AM15    | -                  |                      |                      |                       |                         |                      |                      |                         | -                     | -                     | -                 | -                | -                      | -                   | +                           | CR1-2C_Croc    | GAAAT                   |          |
| AM21    | -                  |                      |                      |                       |                         |                      |                      |                         | -                     | -                     | +                 | +                | +                      | +                   | +                           | CR1-2_Crp      | GACT                    | ***      |
| AM22    | -                  |                      |                      |                       |                         |                      |                      |                         | -                     | -                     | +                 | +                | +                      | +                   | +                           | CR1-2_Crp      | A                       |          |
| AM24    | -                  |                      |                      |                       |                         |                      |                      |                         | -                     | -                     | +                 | ?                | +                      | +                   | +                           | CR1-14_Croc    | AAA                     |          |
| AM25    | -                  |                      |                      |                       |                         |                      |                      |                         | -                     | -                     | +                 | +                | +                      | +                   | +                           | CR1-2_Crp      | AC                      |          |
| CP01    | +                  |                      | +                    |                       | +                       | +                    | -                    | -                       | -                     | -                     | -                 | -                | -                      | -                   | -                           | CR1-2C_Croc    | GAC                     |          |
| CP06    | +                  |                      | +                    |                       | +                       | +                    | -                    | -                       | -                     | -                     | -                 | -                | -                      | -                   | -                           | CR1-2C_Croc    | ATATC                   |          |
| CP07    | +                  |                      | +                    |                       | +                       | +                    | -                    | -                       | -                     | -                     | -                 | -                | -                      | -                   | -                           | CR1-2C_Croc    | TG                      |          |
| CP08    | +                  |                      |                      |                       | +                       |                      | +                    | +                       | -                     | -                     | -                 | -                | -                      | -                   | -                           | CR1-4_Croc     | T                       |          |
| CP10    | +                  |                      |                      |                       | +                       |                      | +                    | +                       | -                     | -                     | -                 | -                | -                      | -                   | -                           | CR1-7B_Gav     | AAC                     |          |
| CP13    | +                  |                      |                      |                       | +                       |                      | +                    | +                       | ?                     | -                     | -                 | -                | -                      | -                   | -                           | CR1-2C_Croc    | CTTAT                   |          |
| CP14    | +                  |                      |                      |                       | +                       |                      | +                    | +                       | -                     | -                     | -                 | -                | -                      | -                   | -                           | CR1-7B_Gav     | AAT                     |          |
| CP15    | +                  | -                    |                      | -                     |                         |                      |                      |                         | -                     | -                     | -                 | -                | -                      | -                   | -                           | CR1-7_Crp      | G                       |          |
| CP18    | +                  |                      |                      |                       | +                       |                      | +                    | +                       | -                     | -                     | -                 | -                | -                      | -                   | -                           | CR1-2C_Croc    | GTTT                    |          |
| CP19    | +                  |                      |                      |                       | +                       |                      | +                    | +                       | -                     | -                     | -                 | -                | -                      | -                   | -                           | CR1-7B_Gav     | TGTAAT                  |          |
| GC01    | +                  |                      |                      |                       |                         |                      | +                    | +                       | +                     | +                     | -                 | -                | -                      | -                   | -                           | CR1-2_Crp      | AACC                    | ****     |
| GC03    | +                  |                      |                      |                       |                         |                      | +                    | +                       | +                     | +                     | -                 | -                | -                      | -                   | -                           | CR1-2_Crp      | CATGT                   |          |
| GC04    | +                  |                      |                      |                       |                         |                      | +                    | +                       | +                     | +                     | -                 | -                | -                      | -                   | -                           | CR1-7B_Gav     | TATTTTC                 |          |
| GC08    | +                  |                      |                      |                       |                         |                      | +                    | +                       | +                     | +                     | -                 | -                | -                      | -                   | -                           | CR1-2_Crp      | AACC                    |          |
| GC09    | +                  |                      |                      |                       |                         |                      | +                    | +                       | +                     | +                     | -                 | -                | -                      | -                   | -                           | CR1-7B_Gav     | AAA                     |          |
| GC12    | +                  |                      |                      |                       |                         |                      | +                    | +                       | +                     | +                     | -                 | -                | -                      | -                   | -                           | ERV1-4_Crp-LTR | GTTG                    |          |
| GG01    | -                  |                      |                      |                       |                         |                      | -                    | -                       | +                     | +                     | -                 | -                | -                      | -                   | -                           | CR1-7B_Gav     | ATGAAT                  |          |
| GG03    | -                  |                      |                      |                       |                         |                      |                      |                         | -                     | +                     | -                 | -                | -                      | -                   | -                           | CR1-5B_Crp     | ATTTCA                  |          |
| GG10    | -                  |                      |                      |                       |                         |                      |                      |                         | -                     | +                     | -                 | -                | -                      | -                   | -                           | CR1-7_Gav      | AGAGG                   |          |
| GG12    | -                  |                      |                      |                       |                         |                      | ?                    | -                       | +                     | +                     | -                 | -                | -                      | -                   | -                           | CR1-5B_Crp     | TCTTG                   |          |
| GG13    | -                  |                      |                      |                       |                         |                      | -                    | -                       | +                     | +                     | -                 | -                | -                      | -                   | -                           | CR1-5B_Crp     | AATATA                  |          |
| GG14    | -                  |                      |                      |                       |                         |                      |                      |                         | -                     | +                     | -                 | -                | -                      | -                   | -                           | CR1-5B_Crp     | AGCTTC                  |          |
| CG_0062 | +                  |                      |                      |                       |                         |                      |                      |                         |                       | +                     | -                 | -                | -                      | +                   | +                           | CR1-2_AMi      | ?                       |          |
| CG_0066 | +                  |                      |                      |                       |                         |                      |                      |                         |                       | +                     | -                 | -                | -                      | +                   | +                           | CR1-9B_AMi     | CCA                     |          |
| CG_0077 | +                  |                      |                      |                       |                         |                      |                      |                         |                       | +                     | -                 | -                | -                      | +                   | +                           | CR1-17_AMi     | ?                       |          |
| CG_0087 | +                  |                      |                      |                       |                         |                      |                      |                         |                       | +                     | -                 | -                | -                      | +                   | +                           | CR1-6C_AMi     | ?                       |          |

Character states are '+' for RE presence, '-' for RE absence, and '?' for missing data. Blank cells: not analyzed.

\*: 17 nt insertion in Caimaninae and 17 nt deletion in *Caiman* + *Melanosuchus*. \*\*: TE most similar to CR1-derived insertion within Gypsy-38\_AMi-l-int consensus.

\*\*\*: 267 nt deletion in Caimaninae and 7 nt deletion in *Caiman* + *Melanosuchus*. \*\*\*\*: 9 nt deletion in Crocodylidae and 197 nt deletion in Gavialidae.

**Table S1. Continued.**

| marker  | locus scaffold<br>in allMis1 | locus<br>orientation in<br>allMis1 | locus start in<br>allMis1 | locus end in<br>allMis1 |
|---------|------------------------------|------------------------------------|---------------------------|-------------------------|
| AM02    | JH739241                     | +                                  | 386608                    | 387618                  |
| AM05    | JH734058                     | +                                  | 123912                    | 124245                  |
| AM06    | JH733477                     | +                                  | 407117                    | 407956                  |
| AM07    | JH734288                     | +                                  | 182819                    | 183242                  |
| AM09    | JH732763                     | +                                  | 178094                    | 178907                  |
| AM15    | JH733358                     | +                                  | 947797                    | 948668                  |
| AM21    | JH734499                     | +                                  | 399867                    | 400499                  |
| AM22    | JH734753                     | +                                  | 766093                    | 767197                  |
| AM24    | JH734874                     | +                                  | 172032                    | 172987                  |
| AM25    | JH735357                     | +                                  | 331471                    | 332118                  |
| CP01    | JH734442                     | +                                  | 536671                    | 537582                  |
| CP06    | JH732326                     | -                                  | 1186970                   | 1187967                 |
| CP07    | JH735857                     | -                                  | 551518                    | 552142                  |
| CP08    | JH737363                     | +                                  | 3079328                   | 3079611                 |
| CP10    | JH739179                     | +                                  | 157198                    | 157874                  |
| CP13    | JH738577                     | +                                  | 133118                    | 133833                  |
| CP14    | JH731454                     | -                                  | 464555                    | 465406                  |
| CP15    | JH731391                     | +                                  | 1188298                   | 1189162                 |
| CP18    | JH734773                     | +                                  | 889393                    | 889951                  |
| CP19    | JH739451                     | +                                  | 243914                    | 244427                  |
| GC01    | JH737872                     | +                                  | 271884                    | 272456                  |
| GC03    | JH737792                     | -                                  | 6210                      | 6986                    |
| GC04    | JH737792                     | -                                  | 146993                    | 147574                  |
| GC08    | JH732327                     | +                                  | 620975                    | 621602                  |
| GC09    | JH733358                     | -                                  | 462882                    | 463085                  |
| GC12    | JH736113                     | -                                  | 1205940                   | 1206409                 |
| GG01    | JH732121                     | -                                  | 128337                    | 128746                  |
| GG03    | JH731430                     | +                                  | 399807                    | 400518                  |
| GG10    | JH733284                     | +                                  | 84786                     | 84936                   |
| GG12    | JH738572                     | +                                  | 46606                     | 46823                   |
| GG13    | JH736752                     | +                                  | 50716                     | 51014                   |
| GG14    | JH737086                     | -                                  | 985458                    | 985734                  |
| CG_0062 | JH731248                     | -                                  | 267734                    | 269121                  |
| CG_0066 | JH731145                     | -                                  | 355472                    | 356412                  |
| CG_0077 | JH731451                     | +                                  | 5082                      | 6528                    |
| CG_0087 | JH734874                     | +                                  | 258990                    | 260122                  |

allMis1: American alligator assembly in UCSC Genome Browser (<http://genome.ucsc.edu/cgi-bin/hgBlat?command=start>).

**Table S2. Oligonucleotide primer sequences.**

| Marker | forward primer (5'-3')                         | reverse primer (5'-3')                           |
|--------|------------------------------------------------|--------------------------------------------------|
| AM02   | AGGTGGGATGGAACAAC                              | TGGTCAACGTAACAGAACTGG                            |
| AM05   | TTGTGCGTCCAGAACAGC<br>CAGAACAGCCCTCAGGAAG      | GGTTGCCTGGGATCAGAG                               |
| AM06   | GTTGGAGATTCTCATCTGGAG                          | TCATTATCGTAGATGGTGTAGTAGC                        |
| AM07   | ACACAGGAACAACCCATCG                            | ACCTGGCAAAGCTGGATG<br>TGGCAAAGCTGGATGACA         |
| AM09   | ATGGACCAAGATGAGGAGG                            | CAAAGAGAATCAGTCCCAAAG                            |
| AM15   | TCATCTCTGGTGACAATGCTG<br>ATCTCTGGTGACAATGCTGAG | CTCTCCTCAGGGGTGAAGTC<br>CTGTGACTGCCGTGGAAG       |
| AM21   | TTCAAGTCCAAGAAGAAGGTG<br>CCAACAACCTCCTCAGGTG   | GCTCAGCTTGTGGCACAC                               |
| AM22   | TTCGGACAGGCTATCAAGG<br>CCCTCAAAGCCTTCTTACC     | AATGCCCTCTGAGTTTCCTC<br>GACCATCACCTCTCCTGTCTC    |
| AM24   | AAGTTTCCATGATTGGCTACAG                         | CCCACCAGAACCTAGTGACAG                            |
| AM25   | TGCCAGAGCACTTAACAGTTG                          | CAGATCCCCACCTTCCAAG                              |
| CP01   | TTTGCCCTCTCCAACCTCC                            | CTACTACTCCATCCATCAGATAGG                         |
| CP06   | ATAATCTTGCTGGGCTATGC                           | TCTGGAGATGTGACACTGTTATG                          |
| CP07   | AACATCCCCAACATCATCC<br>CCCCAACATCATCCTTACAG    | GAGGCGATTCTCCTGTCAC<br>TCCTGTCACTGGAATCAAGAG     |
| CP08   | AAGATTATGAGCAAGTAGCAGG                         | GTTCAATGTGCTTTAGGAAGG                            |
| CP10   | GACTGCTGAAGAGAGAGACTGC                         | ATGAGCTTTGGCTTCTTGG                              |
| CP13   | CATGGGCAGATATTGGAGC                            | TGGATTCCGAACAGGTGC                               |
| CP14   | GCTTGTCTGTTTTGTTACTCC                          | TCTGAATGTATGGTGAAGGTCTG                          |
| CP15   | GGAGGAAGTTGGTGTGAAC                            | CCACTGTTGTGTCCTTAATATCTC                         |
| CP18   | AGCACATGCCAACAAACC                             | CTGCTGAATTGACGAATGC                              |
| CP19   | ACAGATGAAGCCCTGGTAAG                           | GCACAGCAGCTACAGTAAAAG                            |
| GC01   | ACATCAGGGCTTGCTTCTC                            | CGTGAAGATGCTCAAGTGTG                             |
| GC03   | GCCTACAGCAGTGACACACC                           | AATCAGTTTGTTCAAGTGGTTCC                          |
| GC04   | GAGACCCTCAGACCTTCAATC                          | AGGAAGACAGAGAAGATCACAAG                          |
| GC08   | CATCACAGTGCGATCTCCAG                           | ACATTGCTTTCTTCTCCACTAAC                          |
| GC09   | AGTAGGGTTCATGGAACATAGC                         | ACAGCATTCAAAGCCTTTTC                             |
| GC12   | CTTTCCAGCCGTGTGAGAG                            | GGTGTCCATCGCTTGAAG                               |
| GG01   | GCATCATCAAAGCTGTAATG                           | GGTAGTGAAGAGGTTGCCTG<br>CAGATATGTGAACCTACTGAAAAG |
| GG03   | CATCCTCACTGAAATCTCACAG                         | TCTTGTCAATGATCTCCATCTC                           |
| GG10   | TCACACTGAACTCTGGACAGG                          | CTCTGTGGGCTCCTCATTG                              |
| GG12   | GCTTGGGATACACAGGAGG                            | GGAGGTTGTCTTCTGTTCTG                             |
| GG13   | CTTGTTTTACAGCAAGGAAGG                          | GAGATATTAAGAAGGAGACCAGG                          |
| GG14   | CCCTAATTTCTTGCCTAGATAG                         | TGATGAAGCCTTACTGGTGC                             |



**Table S3. CR1 group classification of all analyzed amniote CR1 subfamilies.**

| CR1 group A  | CR1 group B | CR1 group C | CR1 group D  | CR1 group E | CR1 group F | CR1 group G  |
|--------------|-------------|-------------|--------------|-------------|-------------|--------------|
| CR1-B        | CR1-9_CPB   | CR1-3_Croc  | CR1-L3A_Croc | CR1-1_Gav   | CR1-11_Crp  | CR1-13_AMi   |
| CR1-B2       | CR1-10_CPB  | CR1-5_CPB   | CR1-L3B_Croc | CR1-10_AMi  | CR1-12_CPB  | CR1-14_AMi   |
| CR1-C        | CR1-10B_CPB | CR1-1_ACo   | CR1-7_CPB    | CR1-10_Crp  | CR1-12B_CPB | CR1-15_AMi   |
| CR1-C2       | L3b         | CR1-1_PMo   | CR1-8_CPB    | CR1-10B_AMi | CR1-4_CPB   | CR1-1_CPB    |
| CR1-C3       | Plat_L3     | CR1_AC_1    |              | CR1-10D_AMi | CR1-4B_CPB  | CR1-1B_CPB   |
| CR1-C4       | Plat_L3b    | L3          |              | CR1-11_AMi  | CR1-4C_CPB  | CR1_Mam      |
| CR1-D        |             | L3_ME       |              | CR1-12_AMi  |             | PlatCR1      |
| CR1-D2       |             |             |              | CR1-12_Crp  |             | PlatCR1_old1 |
| CR1-E_Pass   |             |             |              | CR1-13_Crp  |             | PlatCR1_old2 |
| CR1-F        |             |             |              | CR1-14_Croc |             |              |
| CR1-F2       |             |             |              | CR1-15_Crp  |             |              |
| CR1-G        |             |             |              | CR1-16_AMi  |             |              |
| CR1-H        |             |             |              | CR1-16_Croc |             |              |
| CR1-H2       |             |             |              | CR1-16_Crp  |             |              |
| CR1-I_Tgu    |             |             |              | CR1-17_AMi  |             |              |
| CR1-J1_Pass  |             |             |              | CR1-17_Croc |             |              |
| CR1-J2_Pass  |             |             |              | CR1-17_Crp  |             |              |
| CR1-J3_Pass  |             |             |              | CR1-17_Gav  |             |              |
| CR1-K1_Tgu   |             |             |              | CR1-18_Crp  |             |              |
| CR1-K2_Tgu   |             |             |              | CR1-2_AMi   |             |              |
| CR1-K3_Tgu   |             |             |              | CR1-2_Crp   |             |              |
| CR1-K4_Tgu   |             |             |              | CR1-20_AMi  |             |              |
| CR1-L1_Tgu   |             |             |              | CR1-2B_Croc |             |              |
| CR1-L2_Tgu   |             |             |              | CR1-2B_Crp  |             |              |
| CR1-X1       |             |             |              | CR1-2C_Croc |             |              |
| CR1-X1_Pass  |             |             |              | CR1-3_Gav   |             |              |
| CR1-X2       |             |             |              | CR1-4_Croc  |             |              |
| CR1-X2_Pass  |             |             |              | CR1-5_AMi   |             |              |
| CR1-X3_Pass  |             |             |              | CR1-5_Croc  |             |              |
| CR1-Y        |             |             |              | CR1-5B_AMi  |             |              |
| CR1-Y_Pass   |             |             |              | CR1-5B_Crp  |             |              |
| CR1-Y1_Aves  |             |             |              | CR1-6_Croc  |             |              |
| CR1-Y2       |             |             |              | CR1-6C_AMi  |             |              |
| CR1-Y2_Aves  |             |             |              | CR1-6D_AMi  |             |              |
| CR1-Y3       |             |             |              | CR1-6F_AMi  |             |              |
| CR1-Y4       |             |             |              | CR1-7_Croc  |             |              |
| CR1-YB1_Tgu  |             |             |              | CR1-7_Crp   |             |              |
| CR1-YB2_Pass |             |             |              | CR1-7_Gav   |             |              |
| CR1-Z1_Pass  |             |             |              | CR1-7B_Gav  |             |              |
| CR1-Z2_Pass  |             |             |              | CR1-8_AMi   |             |              |
| CR1-1_Croc   |             |             |              | CR1-8_Crp   |             |              |
| PSLINE       |             |             |              | CR1-8_Gav   |             |              |
| CR1-2_CPB    |             |             |              | CR1-9_AMi   |             |              |
| CR1-2B_CPB   |             |             |              | CR1-9_Crp   |             |              |
|              |             |             |              | CR1-9B_AMi  |             |              |
|              |             |             |              | CR1-9C_AMi  |             |              |
|              |             |             |              | CR1-9D_AMi  |             |              |

Note that font colors correspond to the taxon designations of fig. 3.



AGTGTATTGTGACACAAAATGCCAAGGTTGTGATTTGGAAGCGTTTTTGGCACAATTTGCGCTGGTGTGAAAGATCACAC  
AAGGAGTAGGCAATGCTGAGCCCATAAATGGCTATATGCTTTGTATTTGGTACTTCTGCTTTTTGTAGATTTAGCTTTTC  
TGTCCCATTGCTGAAAGAGGCAATAATAATTAGAGACACCCCATGGTGCGATTTTTGTTGTTGTTTTGTTTTA  
AG--CCTACTACCTGCCAAAAGATGACGAATATTA

>Cya

-----GCCTAGCAGCCTTGACAGCGATGCAGTGTGCAGCAAGAAGTTCCAT  
TCAGAG---GTTGGCTGGGGAAGGATGGGTGGTCCATACACATGTGCACACATGCA-----GATACACA  
CACACACACACACACACACACACACGC-AAAATGACATATCAAATTTCTCTAAAAGGGACGTATATATGTAACAACCTCTG  
TATAAA-AGTTGGGCTCACGCTGTAAAACAGTTGAATA-TGCTGACTGTGG--GCTGTG-GTCAGACAGGCTGTA-TT  
TCAGGAGCCATGGCTATATAGAAATCTCAAAAAATAGCCACCAGATTTGTCCCGGGGTTTTCTCTCCCCCTCTCAC  
GCTGTTTTGTCTCTCTGGATATAACCTCTTGTGAGAGCCCCCTGTTGTGAGAAAACAAAATGTGTCC---TCTCAC--  
-AAATATATCTTCTCCCCAGGAAGAGAACACACCCACTGCGGAACTTCTTAGCCTGACGAAAGGTTTTTGAACCCAA  
AAGCTTGTCTTAATAACTTTTCTCCAATTTTGGGTTGGTCTAATAAAAAGATATCAAATTCACCCAAGGAACCTGTCTC  
C---TTTCAG---TACATTCACCTCTGAGGGCTGTGTTACTAGCACACCACAAAAC-----CCCTTTG  
GAGGTTGTAGTAACCTGGGCTGACCATTTCATAATGTTTTAGTGATAGGGTCAAGTTTCATCACTGCCATGCTGCTGTGG  
AGTGTATTGTGACACAAAATGCCAGGTTGTGATTTGGAAGTGTTTTTGGCACAATTTGCACTGGTGTGAAAGATCACAC  
AAGGAGTAGGCAATGCTGAGCCCATAAATGGCTATATTGCTTTGTATTTCAGTACTTCTGCTTTTTGTAGATTTAAGCTTTC  
TGTCCCATTCACTGTAGAAGAGGCAATAATAATTAGAGACACCCCATGGTGTGATTTTTGTGT-----

>Mni

CCGTGANTATTACACATTCATGTGGGCACCTTTGCCTAGCAGCCTTGACAGCGATGCAGTGTGCAGCAAGAAGTTCCAT  
TCAGAG---GTTGGCTGGGGAAGGATGGGTGGTCCATACACATGTG-----CACACATG  
CAGATATACACACACACACACACAC-AAAATGACATATCAAATTTCTCTAAAAGGCCAGGTATACATGTTACAACCTG  
TAGAAC-AAATGTTCTCAGGCTGTAGAACAATGAATA-TTTCATCCTGTTGT--GCTGTG-CTTAGGCAATCTGCA-TT  
TCAGGAACCATGGCTATCAAGCAGTCTCAAAAATAGCCACCAAAATTTCTACCCAGGTTTCTCTACCCAGCCTGTGAG  
GCTGCTTGTGCTGTCAGTGTAGATCAGCCTTGCATGAGTGCCCTGCTGGTAGAACAGAAAATGTGTCC---TTTCAG--  
-AAATGTATCCTTTCTCCAGG-----GTCTC  
C---TTTCAG---TACATTCACCTCTGAGGGCTGTGTTACTAGCACACCACAAAAC-----CCCTTTG  
GAGGTTGTAGTAACCTGGGCTGACCATTTCATAATGTTTTAGTGATAGGGTCAAGTTTCATCACTGCCATGCTGCTGTGG  
AGTGTATTGTGACACAAAATGCCAGGTTGTGATTTGGAAGTGTTTTTGGCACAATTTGCACTGGTGTGAAAGATCACAC  
AAGGAGTAGGCAATGCTGAGCCCATAAATGGCTATATTGCTTTGTATTTCAGTACTTCTGCTTTTTGTAGATTTAAGCTTTC  
TGTCCCATTCACTGTAGAAGAGGCAATAATAATTAGAGACACCCCATGGTGTGATTTTTG-----TGTTTTGTTTTA  
AG--CCTACTACCTGCCAAAAGATGATGAATATTA

>Ppa

-----CCTNGNAAATGCTAACGGCTATTCAAAGCTGCAGCAAGAAGTTCCAT  
TTAAAC---GTTGGCTGGGGAAGGATGGGTGGTCCATACACATCTGCACACATG-----GCAGATACACACACACGCAC  
-----GCAGATACACACACACGCAC-AAAATGACATACCAAATTTCTCTAAAAGGCA----TACATGTTACAACCTCTG  
TAGAACAAATGTTCTCAGGCTATAGAACAATGAATATTTTCTCATCTGATGT--GCTGTG-CTTAGGCAATCTGCA-TG  
TCGAGGACCATCGGGGTCAAATGTCTCGAAATGATAGCCGCGAAAGTTCTACCCAGATTTTCTCTCGACCTGCTGGTCAG  
GCTGGCTCTGCTGTCAGTGAAGATCAGCCTTGCATGGGTGCCCTGCTGGTATAACAGAAAATGTGTCC---TTTCAT--  
-AAATGTATCCTTTCTCCAGGAAGAGCACACACCAACTGCTGAAACTTCTTAGCCTGAGGAAGGGTTTTTGAACCCAA  
AAGCTTGTCTTAATAACTTTTCTCCAATTTTGGGTTGGTCTAATAAAAAGATATCAAATTCACCCAAGGAACCTGTCTC  
C---TTTCAG---TACATTCACCTCTGAGGGCTGTGTTACTAGCACACCACAAAACCCAGCCTAAGGGAAGTACCCCTTTG  
GAGGTTGTAGTAATCTGGGCTGACCATTTCATAATGTTTTAGTGATAGGGTCAAGTTTCATCACTGCCATGCTGCTGTGG  
AGTGTATTGTGACACAAAATGCTCAGGTTGTGATTTGGAAGCGTTTTTGGCACAATTTGCACTGGTGTGAAAGATCCCTC  
AAGGAGTAGGCAATGCTGAGCCCATAAATGGCTATATTGCTNTGTATTTCAGTANNAAAGCTTTTGGCAGATTTGAACCTTC  
TCTTCCATTCACTGTAGAAGAGGCAATAATAATTAGAGACACCCCATGGTGTGATTTTTG-----TGTTTTGTTTTA  
AG--CCTACTACCTGCCAAAAGATGATGAATATTA

>Asi\_533315122

CCGTGAATATTACACATTCATGTGGGCACCTTTGCCAGCAGCCTTGACAGCGATGCAGTGTGCAGCAAGAAGTTCCAT  
TTAAAG---GTTGGCTGGGGAAGGATGGGTGGTCCATACACATGTGCGCGCGCGTTCGCGCACACACACACACACACAC  
CACACACACGCACACACACACACAC-ACAATCACATACCAAATTTCTCTAAAAGGCCAGGTATACATGTTACAAC----  
-----CTGAGGCTGTAGAATAATTGAATA-TTTCATCCTGTTGT--GCTGTG-CTTAGGCAATCTGCA-TT  
TCAGGAACCATGGCTATCAAGCAATCTCAAAAATAGCCACCAAAATTTCTACCCAGGTTTCTCTACCCAGCCTGTGAG  
TCTGCTTGTGCTGTCAGTGTAGATCAGCCTTGCATGAGTGCCCTGCTGGTAGAACAGAAAATGTATCC---TTTCTC--  
-----CCAGGAAGAGCACACACCAACTGCTGAAACTTCTTAGCCTGAGGAAGGGTTTTTGAACCCGA  
AAGCTTGTCTTAATAACTTTTCTCCAATTTTGGGTTGGTCTAATAAAAAGATATCAAATTCACCCAAGGAACCTGTCTC  
C---TTTCAG---TACATTCACCTCT-----GTGTTACCAGCAACTACAAACCAACCTAGGGGAAATACCCCTTTG  
GAGGTTGCAGTAACCTGGGCTGATCATTTCATAATGTTTTAGTGATAGGGTCAAGTTTCATCACTGCCATGCTGCTGTGG  
AGTGTATTGTGACACAAAATGCCAGGTTGTGATTTGGAAGCGTATTTGGCACAATTTGCACTGGTGTGAAAGATCACAC  
AAGGAGTAGGCAATGCTGAGCCCATAAATGGCTATATTGCTTTGTATTTCAGTACTTCTGCTTTTTGTAGATTTAAGCTTTC  
TGTCCCATTCACTGTAGAAGAGGCAATAATAATTAGAGACACCCCATGGTGTGATTTTTG-----TGTTTTGTTTTA  
AG--CCTACTACCTGCCAAAAGATGATGAATATTA

>Ami\_13548\_386350-387900

CCGTGAATATTACACATTCATGTGGGCACCTTTGCCAGCAGCCTTGACAGCGATGCAGTGTGCAGCAAGAAGTTCCAT  
TTAAAG---GTTGGCTGGGGAAGGATGGGTGGTCCATACACATGTGAGCATGCGCGCG-----CACACACAC  
ACACA-CACACACACACACACACACAA-AAAATCACAATACCAAATTTCTCTAAAAGGCCAGGTATACACGTTACAAC----  
-----CTGAGGCTGTAGAATAATTGAATA-TTTCATCCTGTTGT--GCTGTG-CTTAGGCAATCTGCA-TT  
TCAGGAACCATGGCTATCAAGCAATCTCAAAAATAGCCACCAAAATTTCTACCCAGGTTTCTCTACCCAGCCTGTGAG  
TCTGCTTGTGCTGTCAGTGTAGATCAGCCTTGCATGAGTGCCCTGCTGGTAGAACAGAAAATGTATCC---TTTCAG--  
-AAATGTATCCTTTCTCTTAGGAAGAGCACACACCAACTGCTGAAACTTCTTAGCCTGAGGAAGGGTTTTTGAACCTGA  
AAGCTTGTCTTAATAACTTTTCTGCAACTATTGGGTTGGTCTAATAAAAAGATATCAAATTCACCCAAGGAACCTGTCTC  
C---TTTCAG---TACATTCACCTCTAAGGACTGTGTTACCAGCGCACACAAAACCAACCTAGGGGAAATACCCCTTTG  
GAGGTTGTAGTAACCTGCTGTGATCATTTCATAATGTTTTAGTGATAGGGTCAAGTTTTCATCACTGCCATGCTGCTGTGG  
AGTGTATTGTGACACAAAATGCCAGGTTGTGATTTGGAAGCGTATTTGGCACAATTTGCACTGGTGTGAAAGATCACAC  
AAGGAGTAGGCAATGCTGAGCCCATAAATGGCTATATTGCTTTGTATTTCAGTACTTCTGCTTTTTGTAGATTTAAGCTTTC  
TGTCCCATTCACTGTAGAAGAGGCAATAATAATTAGAGACACCCCATGGTGTGATTTTTG-----TGTTTTGTTTTA  
AG--CCTACTACCTGCCAAAAGATGATGAATATTA

```

AG--CCTACTACCTGCCAAAAGATGATGAATATTA
>Anolis_GB
TCGCGAATATTACACTTTTCATGTGGGCACCTTTACCAAGCAATGCCAACAGCAGTGATGCTGAACTTCAACAGGTGCTTT
TCAAAG--GTCAGTGGGAAGAAGGGGAGGAATTTGATGGAGCAGGTATGCAGTCTTGTCTA-----TTTGTATA
GTCTTATCTTGCAAAAAAAAAAATAAAAAATAAAACACTTGGTAACCTTTGGTT-----
-----TTGAAGATTAGAAAGAATTGATTA-TAGAAAAATGTTATCTTATGGTTAGAGGAGGTATGAATAT
TAGTATGTATAACAGTTGCAAGGATTATCAGAAGTCAAATTTCTTTCTTTTGTATTTTCTCTTTTTCATGCTTTTTT
ATTTTTCTGTATATCATTTAGTGTGATGTTGAAATATCTAATTTAAAAAAGAAAGAAAAACAG-ATCG--TCATAA--
-----
-----GTTGAAAACAACCTTGAAGGTGCTGCAA-----
-----
-----CCAATAAAGTAGTCTCAATGTTTTGTCATGTTTAAAGAGCTAGAAATGAGATTTG-----TTTTGTCTTTT
AG--CTTACTACTTGCCAAAGGATGATGAATATTA
>Gallus_GB
CCGAGAATATTACAGTTCATGTGGGCTCCTCGGCCAGTGATGTCATGGTGATAGTGTGCTGTGCAGCAAGAGATCCAGT
TCAAAG--GTGGGCTGAG--AGGTTGGGTAACCTCACGGTA-----TACATGTGC
AGGTGTACACATAGGCGTGCACACAT-AAATTTCCCACTACTGC-----
-----CACTAATAACTATTATTCAGAA-TTACAGACTATCTTAGTAATGTGCTTTAGTAACTTGAATC
CCGACAACCTAACAGACAAAAAAATCTTCAAATCTACTGGGTTCTGCAAGCCTGTCTGAATGATTTT-----
-----TTGTTTGTGTTCCAATCACTGTCCAAAAGAA-----
-----
-----CTAGTAATGGTGGAGGAACAATATTTAAAGTAAGATGTCT-----
-----
-----GTTTTCTTAGCTTCTGACTTTC
TGT--GCTATATAGTTAAGAGACTC-AAATAATTAGAAGCTGCGTATGACAGTGTGTTG-----TGTTTGTCTGA
AG--CTTACTACCTGCCAAAAGATGATGAGTATTA

```

## AM05

```

>Penelope-1
-----GTCTTGTATGCAGACCAGCCAGCCTCTGGCTTCTT
TACTTTTTCATTCCATCCAGGAAGAGCACACACCAACTGCTGAACTTCTTAGCTGACGAAGGGTTTTTGAACCCGAAA
GCTTGCTTAATAA-----TTGTTTTT-----CAACTATTTAAGTTGGTCTAATAAAAGATATCA
GATTCACCCAAAGAACCTTGTCTG-----
-----
>Exons
CCTCAGGAAGCCCGGAATATGCTGCTCCAGAACCCTCAGCTGGCTTATGCCCTGCTGCAAGCCAGGTGGTGATGAGAAT
TGTTGATCCAGAGATCGCTCTG-----
-----
AAAATTCTGCATCGCCAGACCAGCGTTCCAC
>Cpo_scaffold08291 orig_len=84638
CCTCAGGAAGCCCGGAATATGCTGCTCCAAAACCCTCAGCTGGCTTATGCCCTGCTGCAAGCCAGGTGGTGATGAGGAT
TGTTGATCCAGAGATCGCTCTG--GTATGTATGATTTCTTCCCCCATTTAGGAGTGATGAGTACACTAATATGGTGAG
GTGGGGCACGTTGGATTCCAGGAGTAGCTG--TGATCAGTG-----
-----GGGTACTCAGCTTCTTTCTCTCTTCTGTCTTAG---
AAAATTCTGCATCGCCAGACCAGTGTTCCAC
>Tsc
CCTCAGGAAGCCCGGAATATGCTGCTCCAAAACCCTCAGCTGGCTTATGCCCTGCTGCAAGCCAGGTGGTGATGAGGAT
TGTTGATCCAGAGATCGCTCTG--GTATGTATGATTTCTTCTCCATTTGGGAGTGATGAGTACGCTAATCTGGTGAG
GTGGGGCACGTTGGATTCCAGGAATAGCTG--TGATCAGTG-----
-----GAGTACTCACAGCTTCTTTCTCTCTTCTGTCTTAG---
AAAATTCTGCATCGCCAGACCAGTGTTCCAC
>Gga_scaffold18345
CCTCAGGAAGCCCGGAATATGCTGCTCCAAAACCCTCAGCTGGCTTATGCCCTGCTGCAAGCCAGGTGGTGATGAGGAT
TGTTGATCCAGAGATCGCTCTG--GTATGTATGATTTCTTCTCCATTTGGGAGTGATGGGTATGCTAATCTGGTGAG
GTGGGGCACGTTGGATTCCAGGAATAGCTG--TGATCAGTG-----
-----GAGTACTCACAGCTTCTTTCTCTCTTCTGTCTTAG---
AAAATTCTGCATCGCCAGACCAGTGTTCCAC
>Cya
CCTCAGGAAGCCCGGAATATGCTGCTCCAAAACCCTCAGCTGGCTTATGCCCTGCTGCAAGCCAGGTGGTGATGAGAAT
TGTTGATCCGAGATCGCTCTG--GTATGTATAATTTCTTCTCCATTTGGGAGTGATGGGTACACTAATCTGGTGAG
GTGGGGCACGTTGATTCCAGGAGTTGCTT--TGATCAGTG-----
-----GGGTACTCACAGCTTCTTTCTCTCTTCTGTCTTAG---
AAAATTCTGCATCGCCAGACCAGCGTTCCAC
>Mni
CCTCAGGAAGCCCGGAATATGCTGCTCCAGAACCCTCAGCTGGCTTATGCCCTGCTGCAAGCCAGGTGGTGATGAGAAT
TGTTGATCCGAGATCGCTCTG--GTATGTATAATTTCTTCTCCATTTGGGAGTGATGGGTACACTAATCTGGTGAG
GTGGGGCACGTTGATTCCAGGAGTTGCTG--TGATCAGTG-----
-----GGGTACTCACAGCTTCTTTCTCTCTTCTGTCTTAG---
AAAATTCTGCATCGCCAGACCAGCGTTCCAC
>Ppa
CCTCAGGAAGCCCGGAATATGCTGCTCCAGAACCCTCAGCTGGCTTATGCCCTGCTGCAAGCCAGGTGGTGATGAGAAT

```



AG--GTAGGTGCTGATTT-AA--TTATTGGGAGTTTCTCTGCTGCTCACTGGCTGAGCTG-TTTTATCTCTATCTCTG  
TAGCTTTTATTGCTCTGTACTTGTATTGTTAAGCTACTGGCCAACAGAAATGAACCTGCTCAGGC-TTTATTATTAATGC  
TGCTGTGCAG-----

-----TTGTTGAAGTGCT  
CAGAGCATTTTATGAGTGGTGTCTTTTCATGTCAAACCTAGAGAATGAGAAATCATTTTGAAGCTGAAAGGCTCACTGTA  
GCAGATCTCACTTTGCTTTGGGGACCATTTTCTCCGGCTGGGTTTCCAAACCATCAGTCTAGTTTGCAA-TTATTCTGAT  
TGCTTTGATTACACTTCAGTACATTTTC-ATCATAGTTAACTTGTCTCTGATAGGAACTGTTGGGGTTCCAGGCAGTAAG  
GCCTTGCAACCAGTTCATCCACTTACTCTTGCAGGTACATGGGACAGGCAGTTGCCAGGGGCATTTTGAGACTCTGCAAG  
ATAGATTTGG----CCCTTGGGTGGCCTTCTGGAATCTTGAACCAAGGAAATCTTAGTTGCAAAGAGAGCTTCTTATTA  
CAGTTCAGTCCCTTAATTAATCCCTTGGGAAACA--GTGCTTTT-AATCTTCTTAT-----TCAAAGA  
ATGCCCTGCTTCCATGGGGC----ACAGGTCTGAGTAT-----TTTATTATTTCTTTAG---ATTTGGGTGAATAGTCC  
ACATACAGCCAGTG

>Cya

AG--GTAAGTGCTGATTT-AATTGTTATTGAGAGTTTGTCTGCTGCTCACTGGCTGAGCTG-TTTTATCTCTATCTCTG  
TAGCTTTTATTGCTCTGTACTTGTATTGTTAAGCTGCGGCCAACAGAAATGAACCTGCTCAGGC-TTTATTATTAATGC  
TGCTGTGCAG---TTCATAGATATTAGGACTGGAAGGGACCTCAGTAGATCATCGAGTCCGACCCCTGCATAGGCAGGA  
AAGAGTGTGGGTTGAGATGACCCAGCCAGATGCCCATCTAACTCCTCTTGAAGACCTCAG---TTGTTGAAGTGCT  
CAGACTATTTTCTGAGTGGTGTCTTTTCATGTCAAACCTAGAGAAAGAGAAATGTTTTAGAATTGAAAGGCTCACTGTA  
GCAGATCTCACTTTGCTTTGGGGACCATTTTCTCAGGCTGGGTTTCCAAACAGTCACTAGTTTGCAAG-TTATTCTGAT  
TGCTTTGATTACAGTAAAGTATATTTTC-ATCATAGTTAACTTGTCTCTGATAGGAACTGTT-GGGTTCGAGGCAGTAAG  
GCCTTGCAAGCCACTTCATCCACTTACTCATGCAGGCAC--GGAACAGGCAGCTGCCAGGGGCATTTTGAGA--CTGCAAG  
ATAGATTTGG----CCCTTGGGTGGCCTTCTGGAATCTTGAACCAAGGAAATCTTAGTTGAAAAGAGAACTTCTTATTA  
CAGTTTAAATCCCTCAATGATTTTCTTGGGAAACACGGTCTTTT-AATCCTCTTAT-----TCAAAGA  
GTGCCCTACTTCCACTGGGC----ACAGGTTTCTGAGTAT-----TGTATTATTTCTTTAG---ATTTGGGTGAATAGTCC  
GCATACAGCCAGTG

>Mni

AG--GTAAGTGCTGATTTAAATTTGTTATTGAGAGTTTGTCTGCTGCTCACTGGCTGAGCTG-TTTTATCTCTATCTCTG  
TAGCTTTTATTGCTCTGTACTTGTATTGTTAAGCTGCGGCCAACAGAAATGAACCTGCTCAGGC-TTTATTATTAATGC  
TGCTGTGCAG---TTCATAGATATTAGGACTGGAAGGGACCTCAGTAGATCATCGAGTCCGACCCCTGCATAGGCAGGA  
AAGAGTGTGGGTTGAGATGACCCAGCCAGATGCCCATCTAACTCCTCTTGAAGACCTCAG---TTGTTGAAGTGCT  
CAGACTATTTTCTGAGTGGTGTCTTTTCATGTCAAACCTAGAGAAAGAGAAATGTTTTAGAATTGAAAGGCTCACTGTA  
GCAGATCTCACTTTGCTTTGGGGACCATTTTCTCAGGCTGGGTTTCCAAACAGTCACTAGTTTGCAAG-TTATTCTGAT  
TGCTTTGATTACAGTAAAGTATATTTTC-ATCATAGTTAACTTGTCTCTGATAGGAACTGTT-GGGTTCGAGGCAGTAAG  
GCCTTGCAAGCCACTTCATCCACTTACTCATGCAGGCACAGGGGACAGGCAGCTGCCAGGGGCATTTTGAGA--CTGCAAG  
ATAGATTTGG----CCCTTGGGTGGCCTTCTGGAATCTTGAACCAAGGAAATCTTAGTTGAAAAGAGAACTTCTTATTA  
CAGTTTAAATCCCTCAATGATTTTCTTGGGAAACACGGTCTTTT-AATCCTCTTAT-----TCAAAGA  
GTGCCCTACTTCCACCGTGC----ACAGGTTTCTGAGTAT-----TGTATTATTTCTTTAG---ATTTGGGTGAATAGTCC  
GCATACAGCCAGTG

>Ppa

AG--GTAAGTGCTGATTTAAATTTGTTATTGAGAGTTTGTCTGCTGCTCACTGGCTGAGCTG-TTTTATCTCTATCTCTG  
TAGCTTTTATTGCTCTGTACTTGTATTGTTAAGCTGCGGCCAACAGAAATGAACCTGCTCAGGC-TTTATTATTAATGC  
TGCTGTGCAG---TTCATAGATATTAGGACTGGAAGGGACCTCAGTAGATCATCGAGTCCGACCCCTGCATAGGCAGGA  
AAGAGTGTGGGTTGAGATGACATCCAAATGCCCATCTAACTCCTCTTGAAGCCTTGAG---TTGTTGAAGTGCT  
GATAGCATTTTCTGAGTGGTGTCTTTTCATGTCAAACATATAGAAAGAGAAATGTTTTAGAATTGAAAGGCTCAGTTGTA  
GCAGATCTCGGTTTGTGTTGGGGACCATTTTCTCAGGGAGGGTTTCCAAACAGTCACTAGAAAATGCAAG-TTATTCTGAT  
TATCTTGAATTACATGTAAGTATATCTC-ATCATAGTTAACTTGTCTCTGATCGGATGTT-GGGTTCGAGGCAGTAAG  
TCCGGGCAGCCACTTCATCCACTTACTCCTGCAGGTACAGGGGACAGTCACTCCAGGGGCATAGCAGAGA--GTGCGAG  
ATAAATTTGG----CCCCAGGGTGGCCCTTGTGACTCTTGAACCAAGGAAATCTTGTGAAAAGAGAACTTCTGAGTT  
CAGTTTAAATCCCGAATGATTTTCCATCGAACCAGGAACAGTTAATGGAACCTTAT-----TCAGAGA  
GTGCCCTACTTCCACCGTGC----ACAGGTTTCTGAGTAT-----TGTATTATTTCTTTAG---ATTTGGGTGAATAGTCC  
GCATACAGCCAGTG

>Asi\_533250755

AG--GTAAGTGCTGATTT-AATTGTTATTGACAGTTTGTCTGCTGCTCACTGGCTGAGCTG-TTTTATCTCTATCTCTG  
TAGCTTTTATTGCTCTGTACTTGTATTGTTAAGCTGCGGCCAACAGAAATGAACCTGATCAGGC-TTTATTATTAATGC  
TGCTGTGCAG---TTCATAGATATTAGGACTGGAAGGGACCTCAGTAGATCATCGAGTCCGACCCCTGCATAGGTAGGA  
AAGAGGCTGGGTTGAGATGACATCCAAATGCCCATCTAACTCCTCTTGAAGCCTTGAG---TTGTTGAAGTGCT  
CAGAGCATTTTCTGAGTGGTGTCTTTTCATGTCAAACCTAGAGAAAGAGAAATCGTTTTAGAATTGAAAGGCTCACTGTA  
GCAGATCTCACTTTGCTTTGGGGACCATTTTCTCAGGCTGGGTTTCCAAACCTCAGTCTAGTTTGCAA-TTATTCTGAT  
TGCTTTGATTACACTTAAAGTATATTTTC-ATCATAGTTAACTTGTCTCTGATAGGAACTGTT-GGGGTTGCAGGCAGTAAG  
GCCTTGCAAGCCACTTCATCCACTTACTCCTGCAGGTACAGGGGACAGGCAGTCCAGGGGCATTTTGAGA--CTGCAAG  
ATAGATTTGG----CCCTTGGGTGGCCTTCTGGAATCTTGAACCAAGGAAATCTTAGTTGCAAAGAGAACTTCTTATTA  
CAGTTCAATCCCTCAATGATTTTCTTGGGAAACACGGTCTTTT-AATCCTCTTAT-----TCAAAGA  
GTGCCCTACTTCCACCGGGC----ACAGGTTTCTGAGTAT-----TGTATTATTTCTTTAG---ATTTGGGTGAATAGTCC  
GCATACAGCCAGTG

>Ami\_3948\_406600-408150

AG--GTAAGTGCTGATTT-AATTGTTATTGAGAGTTTGTCTGCTGCTCACTGGCTGAGCTG-TTTTATCTCTATCTCTG  
TAGCTTTTATTGCTCTGTACTTGTATTGTTAAGCTGCGGCCAACAGAAATGAACCTGCTCAGGC-TTTGTTATTAATGC  
TGCTGTGCAG---TTCATAGATATTAGGACTGGAAGGGACCTCAGTAGATCATCGAGTCCGACCCCTGCATAGGCAGAA  
AAGAGTGTGGGTTGAGATGACCCAGCCAGATGCCCATCTAACTCCTCTTGAAGACCTCAG---TTGTTGAAGTGCT  
CAGAGCATTTTCTGAGTGGTGTCTTTTCATGTCAAACCTAGAGAAAGAGAAATCATTTTGAAGCTGAAAGGCTCACTGTA  
GCAGATCTCACTTTGCTTTGGGGACCATTTTCTCAGGCTGGGTTTCCAAACCTCAGTCTAGTTTGCAA-TTATTCTGAT  
TGCTTTGATTACACTTAAAGTATATTTTC-ATCATAGTTAACTTGTCTCTGATAGGAACTGTT-GGGGTTGCAGGCAGTAAG  
GCCTTGCAAGCCACTTCATCCACTTACTCCTGCAGGTACAGGGGACAGGCAGTCCAGGGGCATTTTGAGA--CTGCAAG  
ATAGATTTGG----CCCTTGGGTGGCCTTCTGGAATCTTGAACCAAGGAAATCGTAGTTGCAAAGAGAA---CTTATTA  
CAGTTCAATCCCTCAATGATTTTCTTGGGAAACACGGTCTTTT-AATCCTCTTAT-----TCAAAGA  
GTGCCCTACTTCCACCGGGC----ACAGGTTTCTGAGTAT-----TGTATTATTTCTTTAG---ATTTGGGTGAATAGTCC  
GCATACAGCCAGTG

>Gallus\_GB

```

AG--GTAAGCACAGATTTACTTCTTGG-GTAGCTTTTCCTGCTGTCTACTTCTTGATCTG-TATTCTCTCTTTGATTG
TTGAAGTTAATGGTAAGCAGCAATACCTGTGGGCCCTTTT-----TAAGTGAATTAGTACTGG-----
-----
-----AGTGTACTGCTCATAT-----
-----GACTGGCTTCCAAA-----TCTAATTTATATTTTGCTCTGC
TTATCTCAATAACACACCACTATATTCA-ACCTGTGTTGAAGCTATAAAAAAT-----
--CCACGGGTTTACCATATCCTCATTTCATGTATTAGCGGAGAATAG-----CTGCAAG
ACCAGTTT-----TAGGATGTTTGGCAGTTTGAGCTA-----TATGTAAAAATCTTTGGACC
TGG--AAGGCCTTAGCTATGTTTCACTTAACAAGATCCTCCT-TGTTAGTTTATCTGCTTTATTTAAACACTCAAAG
ATGCCCTTTTGATGTAATGT---GTGGATCTT-----TTTTCCACTTCTGCAG---ATTTGGGTGAACAGCCC
ACACACAGCCAGTG
>Anolis_GB
AG--GTATTTGCTGCCTT-TGCTCTTGGTTTATATCTGTGTAT-----CTGGTC-----CTCTACTGCAG
TTACCATTGTTTCAAAAACAAGAAATCTCTGGGGTCATAGGAGAGCTAATGGGACTTGTTTTG-----
-----
-----ATCTTACATTTAGTAGATAAGTTTTAGAAAAATATAGCCACTTTGAATAAAGATGCATTTTAAGG-----
CTCTACTTTATTCTCTTATTGATAAAATAGCATTCAAAGAGATGCATCTGTTTCTATGTTA---GAATGCATT-ATT
CTCCCTTCACTTCTGTTTCTGTATACGGTGGATTTAAAAAAAACCAGCCTCT-G-----
---TTTGATCTTCTTAAACATTA-----TTGCAAGT
CTAATGTGGGAGCCAGTGGTGTGTAGTGGTTAAGTGTGGACTA-----GCACTCTGGAGGAGAA-----G
GGTTTAAATCCCATTTGG-AATTCAT-----TTGCT-GAACATTATATGGGTTTCTCTTAGGATCTCCAGAA
ACAATAACTCAAAGTCATGCAGCAATGAGTCTAATGGCTTGCCTTTAATCACTTTCACAG---ATCTGGGTGAATAGTCC
TCACACTGCCAGTG

```

## AM07

>CR1-7

```

-----TAGATTCATAGATTCATAGATGTAGGGTCCGA
AGGGACCTCAATAGATCATCGAGTCCGACCCCT-----GCATAGGCAGGAAAGAGTGTGGGTTCCAGA
TGACCC-----

```

>Exons\_rc

AGGC-----

-----CTGTTGATCATGT

>Cpo\_scaffold13841

```

AGGC---CTGAATTAGGAAAATAAAA-----ACACACAC-----AAAAAAGACCAAAAATCCCTGCA
TTTTAATTGTTTGTCAAATACTGATCTTT-----
-----AACTT---GTGCCTTTAAAAACAATTATTCCTAATTAAA---C
TGCTGAAGGCAGCCACTTTGGAAAACCTTTGTAAATCACAATTTCAAGTCTTACTGCCCTTTCATTTGAATACTATA
TTAACAAAAATAATTTAATTTTGATAAGAAATCCAATTAACAGAACGTGATTCCAGTCTTGTGTGTAATATTA
--TTGACCAATAA-CTAATGACATCAGAA-ACAGTGCTTAAAGTCTTAAAA---TAC---CTGTTGATCATGT

```

>Tsc

```

AGGC---CTGAATTAGGAAAATAAAA-----ACACAC-----AAAAAAGACCAAAAATCCCTGCA
TTTTAATTGTTTGTCAAATACTGATCTTT-----
-----AACTT---GTGCCTTTAAAAACAATTATTCCTAATTAAA---C
TGCTGAAGGCAGCCACTTTGGAAAACCTTTGTAAATCACAATTTCAAGTCTTACTGCCCTTTCATTTGAATACTATA
TTAACAAAAATAATTTAATTTTGATAAGAAATCCAATTAACAGAACGTGATTCCAGTCTTGTGTGTAATATTAAGAGA
TTTGACAAATAA-CTAATGACATCAGAA-ACAGTGCTTAAAGTCTTAAAA---TAC---CTGTTGATCATGT

```

>Gga\_scaffold19390

```

AGGC---CTGAATTAGGAAAATAAAA-----ACACACAC-----AAAAAAGACCAAAAATCCCTGCA
TTTTAATTGTTTGTCAAATACTGATCTTT-----
-----AACTT---GTGCCTTTAAAAACAATTATTCCTAATTAAA---C
TGCTGAAGGCAGCCACTTTGGAAAACCTTTGTAAATCACAATTTCAAGTCTTACTGCCCTTTCATTTGAATACTATA
TTAACAAAAATAATTTAATTTTGATAAGAAATCCAATTAACAGAACGTGATTCCAGTCTTGTGTGTAATATTAACGAGA
TTTGACAAATAA-CTAATGACATCAGAA-ACAGTGCTTAAAGTCTTAAAA---TAC---CTGTTGATCATGT

```

>Cya

```

AGGC---CCGAAAGGGGGGGGGGGGGGGCCCGCAACCCAAAA-----AAAAAAAAGACCAAAAATCCCTGCA
TTTTAAT--TTTGTCAAATACTGATCTTT-----
-----AACTT---GTGCCTTTAAAAACAATTATTCATAATTAAA---C
TGCTGAAGGCAGCCACTTTGGAAAACCTTTGTAAATCACAATTTAAATCTTACTGCCCTTTCATTTGAATACTATA
TTAACAAAAGTAATTTAATTTTGGTAAGAAATCCAATTAACAGAACGTGATTCTAGTCTTGTGTGTAATATTAAGAGT
TTTGACCAATAA-CTAATGACACCAGAA-ACAGGGCTAA-----

```

>Mni

```

AGGC---CTGAATGGGGGGGGGGATGACCCGACAA--CACAA-----AAAAAAAAGACCAAAAATCCCTGCA
TTTTAAT--TTTGTCAAATACTGATCTTT-----
-----AACTT---GTGCCTTTAAAAACAATTATTCATAATTAAA---C
TGCTGAAGGCAGCCACTTTGGAAAACCTTTGTAAATCACAATTTAAATCTTACTGCCCTTTCATTTGAATACTATA
TTAACAAAAGTAATTTAATTTTGGTAAGAAATCCAATTAACAGAACGTGATTCTAGTCTTGTGTGTAATATTAAGAGT
TTTGACCAATAA-CTAATGACACCAGAA-ACAGTGCTTAAAGTCTTAAAA---TAC---CTGTTGATCATGT

```

>Ppa





```

CAGCCCTTCACAGAATTAATCATTTGGATGTGTTAACTGACTGGTGGTGTATGA-----
-----TTTTATGTGTGTGCTGAATTCGTGAGCTGTGCCATTAACATGAAC
TGATTCTGGCTTTCCAG--ATTTATGGGAACACATATTCACACAAAGTGATATCTTCT
>Gga_scaffold10078
AAGAATCTGTTCTTACACCAATGCCAGCCTATGCCAGGCACACAGGACAAGTGGGGACTAACTTTACATGAGCCAGAA
CAG---GTGAGGCTTTTCTTAAACT-----TAACACATGGAAGTAAC TAAGA-----
-----AAAGTACTTGTAA-TTGGGTCTTCACTGTCTTCTCGCCATGGATATGTAGAAAACAGTGTCTTCTGGG
TGATCGCAGAGAATTCCTTAGTAACAATAGATAATAGGTTGCCCATTTGAATGTACGGTTGACTTTGTGATAGCTGCACTTA
TGTAATAGCGGCACCCCTGAATATTGCTTCAACATGTTGAAAAATAACTTCGTGTTGTAATGACCACATACATATTTTCCAG
AAGAGACGGATTCAAAAAACATTTCTCTTAAAAAAGGAGTGTCAAACAACCCGCCCTATGTACCAACTGACAAAGTAG
GTTGTGCGCATATAAAGCTCATGTCTTTCTGAACTAGTAATTCCTTAAAGATGCCATGCTGTCTGCCTTTAGCCTGTTT
TTAGTTTGGAAATATTTTAAATTTGATCTGATAAGA-----ATTAGTCACGTGCTTCAGATGGGGCCGTC-----
--AGTC--AAATGAATCTGATACAGCTATTTTTCAGCACTCTTAAATATTGTAATAATAGCTTTGTGAAAAATAATGT
ACCTGAGTAGAGATGATTATTTTGGATCCTCTTAAAAACAGGACAGGAATGTAAAAACCTGAGTAGTATGATAGACTCCAT
CAGCCCTTCACAGAATTAATCATTTGGGTGTGTTAACTGACTGGTGGTGTATGA--T-----
-----TTTTTGTGTGTGTTGCTGAATTCGTGAGCTATGTCATTAACATGAAC
TGATTCTGGTTTTCCAG--ATTTATGGGAACACATATTCACACAAAGTGATATCTTCT
>Asi_533464261
AAGAATCTGTTCTTACACCAATGCCAGCCTATGCCAGGCATACAGGACAAGTGGGGACCAAACTTTACATGAGCCAGAA
CAG---GTGAGGCTTTTTC AAGCT-----TAACACATGGAAGTAAC TAAGA-----
-----AAAGTACTTGTAACTTGGGGCTTCACTTTCTTCTCGCCATGGACATGTAGAAAACAGTGTCTTCTGGG
TGATCAC--AGAATCTTAGTAATGAAAGAAGATAGGTTGCCCGTTGAATGTATGGTTGACTTTGTGATAGCTGCACTCG
TGTAATA-----
-----GCCACGCTGCTCCTGCCTTTTGCCTGTTT
TTAGTTTGGAAAGATTTTAAATTTGATCTGCTAAGA-----ATTAGTCACGTGCTTCAGATGGGGCCATC-----
--AGTCTG-AATTGAATTTTGATACAGGTATTTTTCAGCACTTTTAAATATTGTAATAATAGGTTTGTGAAAAATAATGT
ACCTGAGTAGAGATGATTATTTTGTATCCTCTCTTAAAAACAGGACAGGAAGGTAACCTGAGTAGTATGATAGACTCCAT
CAGCCCTTCACAAAATTAATCATGTGGGTGTGTTAACTGACTAGTGTGTATGA-----
-----TTTTTATGTGCGTTGCTGAATTCGTGAGCTATGCCATTAACGTGAACC
TGATTCTGGTTTTCCAG--ATTTATGGGAACACATATTCACACAAAGTGATATCTTCT
>Ami_2809_177950-179500
AAGAATCTGTTCTTACACCAATGCCAGCCTATGCCAGGCATACAGGACAAGTGGGGACCAAACTTTACATGAGCCAGAA
CAG---GTGAGGCTTTT-TCAAGCT-----TAACACATGGAAGTAAC TAAGA-----
-----AAAGTACTTGTAACTTGGGGCTTCACTTTCTTCTCGCCATGGACATGTAGAAAAT--AGTGTCTTCTGGG
TGATCAC--AGAATCTTAGTAATGAAAGAAGATAGGTTGCCCGTTGAATGTATGGTTGACTTTGTGATGGCTGCACTCG
TGTAATA-----
-----GCCACGCTGCTCCTGCCTTTTGCCTGTTT
TTAGTTTGGAAAGATTTTAAATTTGATCTGTTAAGA-----ATTAGTCACGTGCTTCAGATGGGGCCATC-----
--AGTCTG-AATTGAATTTTGATACAGGTATTTTTCAGCACTTTTAAATATTGTAATAATAGGTTTGTGAAAAATAATGT
ACCTGAGTAGAGATGATTATTTTGTATCCTCTCTTAAACAGGACAGGAAGGTAACCTGAGTAGTAT-ATAGACTCCAT
CAGCCCTTCACAGAATTAATCATGTGGGTGTGTTTAACTGACTACTGTTGTATGA--TTCATAGATTATAGATGTTAG
GGTCGGAAGGGACCTACTAGATCATCGATGCAACCCCTGCATAAGCAGGAAAGAGTGTGGTCTAGATGACCCAG
CTAGATACTCATCTAACCTCCTCTTGAA--TTTTTATGTGCGTTTCTGAATTCGTGAGCTATGCCATTAACGTGAACC
TGATTCTGGTTTTCCAG--ATTTATGGGAACACATATTCACACAAAGTGACATCTTCT
>Gallus_GB
AGGAATGGTACTTACCCCAATGCCAGCTTACGCCAGACACACAGGACAAGTAGGGACCAAACTTACATGAGTCCAGAA
CAG---GTTTGTGTTCTTAAAGCTAATTTCCAGCACCACCCGGAAGACACTTGAATTCCTGGGAGTTCAAGGATCAAGTA
GGCTTTCTAGTAAACTGTTGCAA-TCAGACTTACATTAATTTCTCATCAAAGTAGAATTTTGTAGCTAAACTGAATTCAAA
ATA-----AATATTTTTTAAACATAAAAATAGCAAAAACAAACACAAAAAAGGGT-----TAATGATGTGTACTTTGG
TGCATTG-----
-----ATTTATCTTGCTC
TTAGTGTATTAGGCTGTGTAATATTCAAGTCAGAAAAGATGCAGTATTGTACAGGAGTTTAAATTTGAAACGTTGTGGT
TAGGCTGCAAAAGGAGAGCTGATGATAGGAGCTTGTTTACTCATCTCACTTGGCTAAAGTTTGTACGATATCAAAGGCTGT
TAC-----AGTTAGCACCTGTTCTGTGC-----TTTT
CTGCTCTGCACAGAGCTAATCACTTCCATGTTTGGGA-----AGTTGTTTGA-----TTTT
-----TTTACTGTATG---TAATCCAGTGACTAGACTGGCTGACCTGACCT
GAATTCGAATTTTCAG--ATCTGTGGGAACCTATTTCTCACAAAGTGATATTTTT

```

**AM15**

```

>CR1-2C
TGCCTCCAGTTTTGGGCTCCACAATTCAAAAAGGATGTGGAGAAGCTTGAGAGAGTCCAGAGAAGAGCCACGCGCATGAT
CAGAGGTCAGGAAAACAGACCTTACGATGACAGGCTGAGAGCCATGGGGCTCTTTAGCC-TGGAAAAGCGCAGGCTCAG-
-----GG-----GTGATCTGATGGCCACCTATAAGTTTATCAGGGGTGACCACCAGGATCTGGGGGAACGTTTGT
CACCAGAGCGCCCAAGGGATGACGAGGTGCAACGGTCAAACTACTGCAAGACCGTTTTCAGGCTGGACATAAGGAAGA
ATTTCTTTACTGTCCGAGCCCCAAGGTTCTGGAACAGCCTGCCATCGGAGGTGTTTCAAGCACCTACATTTGAACACCTTC
AAGAGCAAATTTGATGCTTATCTGTCTGGGATCCTATGACCCAGCTGACTTCTGCTTCCCTTCCGCGGGGGCTGGACTC
GATGATCTTCCGAGGTCCTTCCAGCCCTAATGTCTATGAAATCTAT-----GAAA-----
-----
-----

```





```

CGGACGGTGGGCCAGGCTTTTGAG
>Cya
-----CGGGCCCGTGGGCAGGGTGCAGGAGAGGGTCCCTGCCCGAAGCAGCACGGG
GCAGAGCTAAGGGGAGAAGTCTGTGCGAGAATT-----
-----
-----AGACATCAG
GAGCAGCTGGGGAGTCCGGCTGGTGTCCACAGCCAGCGCGCCTCCTCCAGCCATCAGCAGGCCGCGGGGCAGCAGCTG
CACGAGGCAATGCATGTGACTGCTGCCTGCCCTGGGCTCCCCAGCATCTCCTCCATGGCAAGATGGATGGGAG-AGGA
CCCCAT---GCCAGCCTGCCCCACAGACCTCTGCC-----CTCTCCCTGGAG---AACCGGGCTGGCGGGGGGGG
GGAACGGGGGCCAGGTTTCAAG
>Mni
CGTGTGGCCAGGAGCTTGTAGGGGTACGGGCCCGTGGGCAGGGTGCAGGAGAGGGTCCCTGCCCGAAGCAGCACGGG
GCAGAGCTAAGGGGAGAAGTCTGTGCGAGAATT-----
-----
-----AGACATCAG
GAGCAGCTGGGGAGTCCGGCTGGTGTCCACAGCCAGCGCGCCTCCTCC-----GCAGGCCGCGGGGCAGCAGCTG
CACGAGGCAATGCATGTGACTGCTGCCTGCCCTGGGCTCCCCAGCATCTCCTCCATGGCAAGATGGATGGGAG-AGGA
CCCCAT---GCCAG-CCTGCCCCACAGACCTCTGCC-----CTCGCCTGCAG---AGCCAGGCCATGCGGGTGGT
CGGACGGTGGGCCAGGCTTTCGAG
>Ppa
-----GGGCAGGGTGCAGGAGAGGGTCCCTGCCCGAAGCAGCACAGG
GCAGAGCTAAGGGGAGAAGTCTGTGCGAGAATT-----
-----
-----AGACATCAG
GAGCAGCTGGGGAGTCCGGCTGGTGTCCACAGCCAGCGCGCCTCGTCCAGCCATCAGCAGGCCGCGGGGCAGCAGCTG
CACGAGGCAATGCATGTGACTGCTGCCTGCCCTGGGCTCCCCAGCATCTCCTCCATGGCAAGATGGATGGGAG-AGGA
CCCCAT---GCCAGCCTGCCCCACAGACATCTGCCCTCGCCTGCAG---AGCCAGGCCATGCGGGTGGT
CGGACGGTGGGCCAGGCTTTCGAG
>Asi_533456113
CGTGTGGCCAGGAGCTTGTAGGGGTACGGGCCCGTGGGCAGGGTGCAGGAGAGGGTCCCTGCCCGAAGCAGCATGGG
GCAGAGCTAAGGGGAGAAGTCTGCCGAGGACT---AGACATCAGGAGGCGGACTTCACAGTCAGGGCAGCTAGGATCTG
GAACCAACTTCCAAGCGAAGTGGTGTGCTGCTCCTACCCTAGGG---GTCTTTAAGAAGTTAGACAACACCTTGTGGGG
TCGTTTGACCCAGTACTTTTCTGCCA-TGGCAGGGGGTGGACTTGATGATCTGCTCAGGTCCTTCCGACCCG-AC
CAACTATGAAACTATGACT---CGTCTGACTGCCAGAGATGGAGGCATAGTCTAGACCCCGTCCCCCAGGAAGAGC
AAGCAGCTGGGGAGTCCGGCTGGTGTCCACAGCCAGCACACCTCCTCCAGCCATCAGCAGGCCAGGGGCAGCAGCTG
CACGAGGCAATGCATGTGACTGCTGCCTGCCCTGGGCTCCCCAGTGTCTCCTCCATGGCAAGATGGATGGGAG-AGGA
CCCCAT---GCCAGCCTGCCCCACAGACATCTGCCCTCCGGTCTCGCCTGCAG---AGCCAGGCCATGCGGGTGGT
CGGACGGTGGGCCAGGCTTTCGAG
>Ami_5653_399300-400850
NGTGTGGCCAGGAGCTTGTAGGGGTACGGGCCCGTGGGCAGGGTGCAGGAGAGGGTCCCTGCCCGAAGCAGCACGGG
GCAGAGCTAAGGGGAGAAGTCTGCCGAGGACT---AGACATCAGGAGGCGCTACTTCACAGTCAGGGCGGCTAGGATCTG
GAACCAACTTCCAAGCGAAGTGGTGTGCTGCTCCTACCCTAGGG---GTCTTTAAGAAGTTAGACGAACATCTTCCAGGG
TCATTTGACCCAGTACTTTCTTCTGCCA-TGGCAGGGGGTGCAGACTTGATGATCTGCTCAGGTCCTTCCGACCCG-AC
CAACTATGAAACTATGACT---CGTCTGACTGCCAGAGATGGAGGCATAGTCTAGACCCCGTCCCCCAGGAAGAGC
AAGCAGCTGGGGAGTCCGGCTGGTGTCCACAGCCAGCACACCTCCTCCAGCCATCAGCAGGCCAGGGGCAGCAGCTG
CACGAGGCAATGCATGTGACTGCTGCCTGCCCTGGGCTCCCCAGTGTCTCCTCCATGGCAAGATGGATGGGAG-AGGA
CCCCAT---GCCAGCCTGCCCCACAGACATCTGCCCTCCGGTCTCGCCTGCAG---AGCCAGGCCATGCGGGTGGT
CGGACGGTGGGCCAGGCTTTCGAG
>Gallus_GB
-----AGGATGCC-----
-----GGGGTGGCTGTGCCGGACCT-----
-----
-----GGCATCAC
GA-----TGGCTTGCACTTCTGAGCT-----GCAGTC-----GCAGTGGCGA
TGCGCGGAAA-----GCCGGCAGCTGCTCACC-----ATGG
GCTGAT-----GCCTGTGCTGCTCCTCCCTGCCCTGCAG---AGCCAGGCCATGCGCATCGT
CGGACGGTGGGACAGGCTTTCGAG

```

## AM22

```

>CR1-2
-----
-----
-----
-----CGAGTGTGGGATGCAGTCAGGAAGGCC---AA---CCGCACCTTGTGATGCATC
CACAGATGCATCTCGAGCAGGTCGAAGGAGGTGATCCTCCCCCTATGCGGCACTGGTCCAGGCCGAGCTGGAGTACTG
CGTCCAGTCTTGGGCGCGCCTTCAAGAGGGATGTGGACAACATGGAGAGGGTCCAGAGGAGGGCCACTCGCATGATCA
GGGGGCAGCAGGCGAGCCCTACGAGGAGAGGCTACGGGACCTGAACCTGTTACGCTCCACAAGAGAAGGCTGAGGGGG
GATCTAGTGGCCTGTACAACTAGTACAGGGGGACAGCAGGCACTGGGGGAGTCCCTGTTCCCGGAGCAGTCCAGG
AGTGACCAGGAAATAACGGTCAAGCTGGCAGAGGGTAGATTAGACATCAGGAGGCGCTACTTCACTGTGAGG
GCGGCTAGGATCTGGAACCAACTTCCAAGCGAAGTGGTGTG---GCTCCTACCTGGGGTCTTTAAGAGGAGGCTTGC
GAWCACCTTGGTGGGGTGGTTGACCCAGTACTCTTTCTGCCATGGCAGGGGGTGGACTTGATGATCTGCTCAGGTC
CCTTCCGACCTACTAATATGAAACTATGA---AACTATG-----
-----

```



CCTTCTGACCCTATCAACTATGAAACTATGA---TTTGTCTGAGGCTTAGAGGAGCTCATGGCAGCAAGGAGCCTTTTG  
TGTGTGGCTGCCACCCCAACTCTGCCCCCTCCTCCAG---GTGACACACCCGAGACAGG-----

>Mni

-----TGAGCCAGCATATACGGTTAGTCCCCTT  
CCTACGCTCTCACATGGGGCAGGAACCTCACTCCTCAGAGACATCTCCCCTCCCTGTACCAGCTGACCCCAAGAAGGCA  
GGTATGATCCCCCTCAGGCCCTCAAAGCCTCCTACCTTAGGACTGACCAAGNCCCTGGTTTCTCACTACACATCCC  
-TCTGTCTTTCATTCTGCAAACCTTAAACATCCCC-----AGTATAATGGTTGCTTCACTGAGGGTGG  
GATCTGCCA-GGTGCTGCCCTT-CCCAGCTTGTGCTCACAGAGCAGGTTGAA---CCACACCTTGTCTATGCATC  
CACAGATGCATCATGAGTAGGTCCAAGGAGGTGATCCTCCCCCTATGCGGCACTGATCAGGCCGAGTTGGAGTCTG  
TGCCAGTTCTGGGCACTGCACTTCAAGAGAGATGTGGACAGCATTGAGAGGATTCAGAGGAGGGCCACCTGCATGATC-  
GGGGCAGCAGGGCAGGCCCTACAAGGAGAGGCTGAGAGACCTGAACCTGTTTACAGCTACACAAGAGAAGGCTGAGAGGG  
GATCTAGTGGCCTGTTGCAAACCTAGTCCGAGGGGACCAGCAGGATTGGGGGAGTCCCTGTTCCCCCGAGCCTACCAGG  
AGTGACTAGA---AATGGTCAACAAGCTGGGAGAGGGTAGATTGAGACTAGACATTAGGAGGCACTACTTCACTGTCAGG  
CGGCTATGATCTGGAGCAACTTCAAAGAGAAGTGGTGTG--GCTCCTATCCTGGGGTCTGTAAGAGGAGGTTAGAC  
AAACTCCTCGCTGGGGTCAATTTGACCCAGTACTTTTTCTGACATGGCAGGGGGTCAAGACTTGTATGATCTGCTCAGGTC  
CCTTCCAAACCCTATCAACTATGAAACTATGA---TTTGTCTGAGGCTTAGAGGAGCTCAAGGCAGCAAGGAGCCTTTTG  
TGTGTGGCTGCCACCCCAACTCTG-CCCCCTCCTCCAG---GTGACACACCCGAGACA-----

>Ppa

-----TCTTGGGGGAAGATCTTATGCCTCCATGAGCCAGCATATAC-GTTAGTCCCCTT  
CCTACCTCTCTCACATGGGGCAGGAACCTCACTCCTCAGAGACATCTCCCCTCCCTGTACCAGCTGACCCCAAAAAGGCA  
GGTATGATCCCCCTCAGG-CCCCCTCAAGCCTCTCTA-----CCCTGGCTACTCACTACACATCCC  
-TCTGCCACCATTCAAGCACTGT-AACNNNNNNNNNNNNNNNNNNNNNNNNNNNNNNNNNNNNNNNNNNNNNNNNNNNN  
NNNNNNNNNNNNNNNNNNNNNNNNNNNNNNNNNNNNNNNNNNNNNNNNNNNNNNNNNNNNNNNNNNNNNNNNNNNN  
NNNNNNNNNNNNNNNNNNNNNNNNNNNNNNNNNNNNNNNNNNNNNNNNNNNNNNNNNNNNNNNNNNNNNNNNNNNN  
NNNNNNNNNNNNNNNNNNNNNNNNNNNNNNNNNNNNNNNNNNNNNNNNNNNNNNNNNNNNNNNNNNNNNNNNNNNN  
GGAGGCAGCAGGGCAGCCCTCCAAGGAGACAAGGAGAGACCTGAACCCCTTACCCTCCCAAGTCAAGNNTGAGAGGG  
GATCTAGTGGCCTGTTGCAAACCTAGTCAAGAGGGACCAGCAGGATTGGGGGAGTCCCTGTTCCCTGAGCCTACCAGG  
AGTGACTAGA---AATGGTCAACAAGCTGGGAGAGGGTAGACTGAGACTAGACATCAGGAGGTGCTATTTCACTGTCAGG  
CGGCTAGGATCTGGAGCAACTTCAAAGAGAAGTGGTGTG--GCTCCTATCCTGGGGTCTTAAAGAGGAGGTTAGAC  
AAATACCTCGCTGGGGTCAATTTGACCCAGTACTTTTTCTGACGTGGCAGGGGGTCAAGACTTGTATGATCTGCTCAGGTC  
CCTTCCGACCCTATCAACTATGAAACTATGA---TTTGTCTGAGGCTTAGAGGAGCTCAAGGCAGCAAGAAGCCTTTTG  
TGTGTGGCTGCCACCTCAACTCTG-CCCCCTCCCCAG---GTGACACACCCGAG-----

>Asi\_533241635

TATTGCCATGCCCTGCAAGTCCACGGTTCTGGGAAAGATCTTATGCCTCCATGAGCCAGCATATAC-GTTAGTCCCCTT  
CCTATCTCTCTCACATGGGGCAGGAACCTCACTCCTCAGAGACATCTCCCCTCCCTGTACCAGCTGACCCCAAGAAGGCA  
GGTATGATCCCCCTCAGGCCCTCAAAGCCTTCTACCTTAGGACTGACCAAGGCCCTGGCTTCTCACTACACATCCC  
-TCTGTCTTTCATTCTGCAAACCTT-AAACATCCCC-----AGTATAATGGTTGCTTCACTGAGGGTGG  
GATCTGCCA-GGTGCTGCCCTG-CCCAGCTTGTGCTACAGAGCATCAGGTTGAA---CCACACCTTGTCTATGCATC  
CACAGATGCATCATGAGCAGGTCTAAGGAGGTGATCCTCCCCCTATGACAGCACTGGTCAAGGCCGAGTTGGAGTACTG  
CGTCTAGTTCTGGGCACTGAGGAG-GATATGGACAGCATTGAGAGGGTCCAGAGGAGGGCCACCCGCATCA  
GGGGCAGCAGGGCAGGCCCTACAGGAGAGGCTGAGAGACCTGAACCTGTTTACAGCTCCACAAGAGAAGGCTGAGGGGG  
GATCTAGTGGCCTGTTACAAACCTAGTCAAGAGGGACCAGCAGGATTGGGGGAGTCCCTGTTCCCCCGAGCCTACCAGG  
AGTGACTAGA---AATGGTCAACAAGCTGGGAGAGGGTAGATTGAGACTAGACATCAGGAGGCACTACTTCACTGTCAGG  
CGGCTAGGATCTGGAACCAACTTCAAAGTGAAGTGGTGTGCTGCTGCTATCCTGGGGTCTTAAAGAGGAGGTTAGAC  
AAATACCTCACTGGGGTCTTTGACCCAGTACTTTTTCTGCCATGGCAGGGAGTGGGACTTGGAGTCTGCTCAGGTC  
CCTCCGACCCTATCAACTATGAAACTATGA---TTTGTCTGAGGCTTAGAGGAGCTCAAGGCAGCAAGGAGCCTTTTG  
TGTGTGGCTGCCACCCCAACTCTG-CCCCCTCCCCAG---GTGACACACCCGAGAGAGGTTGATGGTTCATGAA  
GGAGCTGATCCGCTTTGAT

>Ami\_6070\_766000-767550

TATTGCCATGCCCTGCAAGTCCACGGTTCTGGGAAAGATCTTATGCCTCCATGAGCCAGCATATAC-GTTAGTCCCCTT  
CCTATCTCTCTCACATGGGGCAGGAACCTCACTCCTCAGAGACATCTCCCCTCCCTGTACCAGCTGACCCCAAGAAGGCA  
GGTATGATCCCCCTCAGGCCCTCAAAGCCTTCTACCTTAGGACTGACCAAGGCCCTGGCTTCTCACTACACATCCC  
-TCTGTCTTTCATTCTGCAAACCTT-AAACATCCCC-----AGTATAATGGTTGCTTCACTGAGGGTGG  
GATCTGCCA-GGTGCTGCCCTG-CCCAGCTTGTGCTACAGAGCATCAGGTTGAA---CCACACCTTGTCTATGCATC  
CACAGATGCATCATGAGCAGGTCCAAGGAGGTGATCCTCCCCCTATGACAGCACTGGTCAAGGCCGAGTTAGAGTACTG  
CATCCAGTTCTGGGCGTGCCTTCAAGGAG-GATATGGACAGCATTGAGAGGGTCCAGAGGAGGGCCACCCGCATAATCA  
GGGGCAGCAGGGCAGGCCCTACAGGAGAGGCTGAGAGACCTGAACCTGTTTACAGCTCCACAAGAGAAGGCTGAGGGGG  
GATCTAGTGGCCTGTTACAAACCTAGTCAAGAGGGACCAGCAGGATTGGGGGAGTCCCTGTTCCCCCGAGCCTACCAGG  
AGTGACTAGA---AATGGTCAACAAGCTGGGAGAGGGTAGATTGAGACTAGACATCAGGAGGTGCTACTTCACTGTCAGG  
CGGCTAGGATCTGGAACCAACTTCAAAGTGAAGTGGTGTGCTGCTGCTATCCTGGGGTCTTAAAGAGGAGGTTAGAC  
AAATACCTTGTGGGGTCTTTGACCCAGTACTTTTTCTGCCATGGCAGGGAGTGGGACTTGGAGTCTGCTCAGGTC  
CCTTCCAAACCCTATCAACTATAAAACTATGA---TTTGTCTGAGGCTTAGAGGAGCTCAAGGCAGCAAGGAGCCTTTTG  
TGTGTGGCTGCCACCCCAACTCTG-CCCCCTCCCCAG---GTGACACACCCGAGAGAGGTTGATGGTTCATGAA  
GGAGCTGATCCGCTTTGAT

>Gallus\_GB

-----TTCCG  
GCCAGGCCATCAAGGTGCACTGCTTGGCCATGCCATTTGTGTTATGAGCATGGTGG---TCTTAGCTGTGTGGGGTGGG  
GATGTG---AGTGATGCGTCCG-----  
-----  
-----  
-----

-----  
-----AGAGGTGCTGAGTGCC-----  
-----TGCCTTCCGCCAG--GTGACGCACAGGGAAACGGGCGAGGTGATGGTTATGAA  
GGAGCTGATCCGCTTTGAT

## AM24

>CR1-14

-----GCTGGGGAGTTCCCC---TCTTCAAAGCACAGAGGCGGAAAGGG  
ATCTTGGAGTCATTATTGACTCCAAGATGAACATGAGCCGCCAATGCCAGACCCAGCCAGCAAGGCCAGCCATACTTGT  
TCATGCATCCAAAGATGCATCTCAAGCCGGTCCAGAGAGGTGATACTCCCCCTATGCGACTTTGGTCAGGCCGAGTT  
GGAGTACTGCGTCCAGTACTGGGCGCCGCACTTCAAAGGGATGTGGCCAGCCTGGAGAGGGTTTCAGAGGAGGGCCACCC  
GCTTGGTGAGAGGGCAGC-AGGACAGGCCCTATGAGGAGAGACTGAGGGACCTGAACCTGTTTCAGCCTCAGCAAGAGGAG  
GCTGAGGGGGGACCTGGTGGCTGCCTACAACTCATCAGGGGAGATCAACAGCAAATAGG-AGAGCCCTTTTCTCCCGAG  
CACCACCTGGGGTGACGAGGAACAATGGTAATAAGCTGATGGAGAATAGGTTTAGGTTAGAGATCAGAAGGCAATATTTT  
ACAGTTAGGGTGGCCAAAATCTGGAACCAACTTCCCAGGGAAGTGGTCCTCGCCCTACCTTGGGC-AAATTCAGAGGA  
GGTTGGATGATCACCTGTCTGGGGTCTTGTGTAACCCAGCATTTCCTGCCTGTGGCAGGGGGTCAGG--CTAGATGAT  
CTGTTCAAGTCCCTCCTGACCCTAGCTACTATGAAACTA-----

-----  
>Exons\_rc

-----GTTCAAACCTCACCC

>Cpo\_scaffold00130

T---GAAGAAAGAGGAAAAGGTGAGATTTGCAAATAGG--AATGACAGTTTTTCTGTGTTTACAGTAAACTACAGCC  
CTATTTGGCTTGGAGGCAAATTTATGCTCTGTGGTTGTGCTGCCAACAA-----

-----ACTGTTTATGTATCTACTGCACATT--CAG  
TCATCCAAGCCACATAAGCACCAATGAGCTAGGAGAAATGCTAGCTAGG--AAACAGACCCAGGAGGTGGA-GGGGAGAT  
ACTCAC---GTTCAAACCTCACCC

>Tsc

T---GAAGAAAGAGGAAAAGGTGAGATTTGCAAATAGG--AATGACAGTTTTTCTGTGTTTACAGTAAACTACAGCC  
CTATTTGGCTTGGAGGCAAATATTATGCTCTGTGGTTGTGCTGCCAACAA-----

-----ACTGTTTATGCATCTACTGCACATTCACAG  
TCATCCAAGCCACATAAGCACCAATGAGCTAGGAGAAATGCTAACTAGG--AAACAGACCCAGGAGGTGGA-GGGGAGAT  
ACTCAC---GTTCAAACCTCACCC

>Gga\_scaffold39444

T---GAAGAAAGAGGAAAAGGTGAGATTTGCAAATAGG--AATGACAGTTTTTCTGTGTTTACAGTAAACTACAGCC  
CTATTTGGCTTGGAGGCAAACATTATGCTCTGTGGTTGTGCTGCCAACAA-----

-----ACTGTTTATGCATCTACTGCACATT--CAG  
TCATCCAAGCCACATAAGCACCAATGAGCTAGGAGAAATGCTAGCTAGG--AAACAGACCCAGGAGGTGGA-GGGGAGAT  
ACTCAC---GTTCAAACCTCACCC

>Cya

-----TGACACTTATCTTACTATTTACAGCAAACCTATAGCC  
CTATTTGGGTTGGAGGCAAAGTTATGCTCTGTGGTTGTGATGCCAACAAA---CTTTGAAAGCACAGAACGAGAACAGG  
ATCTTGGAGTCAGTAATGACTCCAAGATGAACACGAGCCGCAAAGCCACACCACAGCCAGCAAGGCTAGCCATACCGTG  
TCATGCATCCAAAGGTGCATCCCAAGCCAATCCAGAGAGGTGATCC---CCCCTATGTGACTTTGGTCAAGCTGCAGAT  
GGAGTACTGCGTCCAGTACTGGGCACCCGCACTTCAAAGGGGATGTGGCCTGCCTG--GAGGGTTCAAAGGAGGGCCACCC  
GCTTGGTAAGAGAGCAGCAAGGACAGGCCCTATGAGGAGAGACTGAGGGACCTGAACTTGTTCAGCCTCAGCAAGAGGAG  
GCTGAGGGGGGACCTGGTGGCTGCCTACAAACTCATCAGGGGAGATCAACAGCAAATAGGTAGAGCCCTTTTCTCCCCAG  
CATCACCTGGGGTGACAAGGAACAATGGTCATAAGCTGATGGAGAATAGGTTTACAGATCAGAAGGCAATATTTT  
ACAGTTAGGGTAACAAAATCTGGAACCAACTTCTAGGGAAGTGGTCTCACCCCTACCTTGGTCAAATTTCAAGGGGA  
GGTTGGATGATCACTTGTCTGGGGTCTTGTAAACCCAGCATTTCCTGCCTGTGGCAGGGGCTCAGGGCTAGANTGGT  
CTGTTCAAGTCCCTCCTGACCCCTAGATACTATGAAACTACTATGAA---ACTGTTTATGTGTCTACTGCACATT--CAG  
TCATCCAAGACACATCAGCACCAACAAGCTAGGAGAAGTGTAGTAGG--AAACAGACCAGGAGGTAGAGGGGNANAT  
ACTCAC---GTTTCAAACCTCACCC

>Ppa

-----AACAGA--AATGACACTTATCTTACTGTTTACAGCAAACCTACAGCC  
CTATTTGGCTTGGAGGCAAAGTTATGCTCTGTGGTTGTGATGCCAACAAA---CTTTGAAAGCACAGAACGAGAACGGG  
ATGTTGGAGTCATTAAGTACTGACTCCAAGATGAACATGAGCCGCAATGCCACACCACAGCCAGCAAGGCTAGCCATACTGTG  
TCATGCATCCAAAGGTGCATCCCAAGCCAATCCAGAGAGGTGATCC---CCCCTATGTGACTTTGGTCAAGCAGCAGTT  
GGAGTACTGCGTCCAGTACTGGTGCCTCAAAAGGGATGTGGCAGCCTGGAGAGGGGTGAGAGGAGGGCCACCC  
GCTTGGTGGAGAGGGCAGC-AGGACAGGCCCTATGAGGAGAGACTGAGGGACCTGAACTTGTTCAGCCTCAGCAAGAGGAG  
GCTGAGGGGGGACCTGGTGGCTGCCTACAAACTCATCAGGGGAGATCAACAGCAAATAGGTAGAG-----CCCAG  
CACCCTTGGGGTGACAAGGAACAATGGTCATAAGCTGATGGAGAATAGGTTTACAGATCAGAAGGCAATATTTT  
AC-----

>Asi\_533273516

T-GAAGAAGAAAGAAAGAAAGGTTGAGATTTGCAAACAGG---AATGACAGTCTCTGTGCTGTTTACAGTAAACTACAGCC  
CTATTTGGCTTGGAGGCAAAGTTATGCTCTGTGGTTGTGATGCCAACAAA---CTTTGAAAGCACAGAACGAGAACGGG  
ATCTTGGAGTCATTAAGTACTGACTCCAAGATGAACATGAGCCGCAATGCCACACCACAGCCAGCAAGGCTAGCCATACTGTG  
TCATGCATCCAAAGGTGCATCTCCAGTCCGCTCCAGAGAGGTGATACTCCCCCTCTATGTGACTTTGGTCAAGCAGCAGTT  
GGATTAATGTGTCCAGTACTGGGCGCCGCACTTCAAAGGGGATGTGGCAGCCTGGAGTGGGTTGAGAGGAGGGCCACCC  
GCTTGTGAGAGGGGAGC-AGGACAGGCCCTATGAGGAGAGACTGAGGGATCTGAACTTGTTCAGCCTCAGCAAGAGGGG  
GG-----ACCTGGTGGCTGCCTACAAACTCATCAGGGGAGATCAACAGCGAATAGGTAGAGCCCTTTTCTCCCCAG  
CACCACCTGGGGTGACAAGGAACAATGGTCATAAGCTGATGGAGAATAGGTTTACAGATCAGAAGGCAATATTTT  
ACAGTTAGGGTGGCCAAAATCTGGAACCAACTTCCAGGGAAGTGGTCTCGCCCTACCTTGGTCA-AAATTCAGAGGGA  
GGTTGGACGATCACCTGTCTGGGGTCTTGTGAACCCAGCATTTCCTGACTGTGGCAGGGGGTTCAGG--CTAGATGAT  
CTGTTTCAGGTCCCTCCTGACCCCTAGCTACTACGAAACT-----GTTTATGTATGTACTGCACAGT--CAT  
CCAA----GCCGCATCAGCACCAATAAGCTAGGAGAAATGCTAGTAGG--AAACAGACCAGGAGGTAGA-GGGGAGAT  
ACTCAC---GTTCAAACCTCACCC

>Ami\_6279\_171750-173300

T-GAAGAAGAAAGAAAGAAAGGTTGAGATTTGCAAACAGG---AATGACAGTCTCTGTGCTGTTTACAGTAAACTACAGCC  
CTATTTGGCTTGGAGGCAAAGTTATGCTCTGTGGTTGTGATGCCAACAAA---CTTTGAAAGCACAGAACGAGAACGGG  
ATCTTGGAGTCATTAAGTACTGACTCCAAGATGAACATGAGCCGCAATGCCACACCACAGCCAGCAAGGCTAGCCATACTGTG  
TCATGCATCCAAAGGTGCATCTCAAGCCAGTCCAGAGAGGGCGATCCTCCCCCTCTATGCAACTTTGGTCAAGCCGCACT  
ATAGTACTGTCACAGTACTGGGCGCCGCACTTCAANAGGAGAGACTGAGGGACCTGAACTTGTTCAGCCTCAGCAAGAGGAG  
ACTTGGTGGAGAGGGCAGC-AGGACAGGCCCTATGAAAGAGAGACTGAGGGACCTGAACTTGTTCAGCCTCAGCAAGAGGAG  
GCTGAGGGGGGACCTGGTGGCTGCCTACAAACTCATCAGAGGAGATCAACAGCAAATAGGCAGAGCCCTTTTCTCCCCAG  
CACCACCTGGGGTGACAAGGAACAATGGTCATAAGCTGATGGAGAACAGGTTTACAGATCAGAAGGCAATATTTT  
ACAGTTAGGGTGGCCAAAATCTGGAACCAACTTCCAGGGAAGTGGTCTCGCCCTACCTTGGTCA-AAATTCAGAGGGA  
GGTTGGATGATCACCTGTCTGGGGTCTTGTGAACCCAGCATTTCCTGCTGTGGCAGGGGGTTCAGG--CTAGATGAT  
CCGTTTCAGGTCCCTCCTGACCCCTAGCTACTATGAAACTACTATGAA---ATTGTTTATGTATCTACTGCACATT--CAC  
TCATCCAAGCCACATCAGCACCAATAAACTAGGAGAAATGCTAGTAGG--AAACAGACCAGGAGGTAGA-GGGGAGAT  
ACTCAC---GTTCAAACCTCACCC

>Gallus\_GB

TTGAGGAAAAAAGGGAGAAATGAGTTTGTCAAATAAATACATTGACAAATCTTCTA---CCACTACTCAGTACAGAT  
CCTCCTGATCTAAG-----

-----ATGTGTTTTT-----GAG  
TTGCCCATTCCTGCCACCTCAGTAGA---GGAAAGGCAGAAATAAGGAACATCAGA-----CAGAAGGT  
ACTTAC---GTTCAAATTTCACCC

## AM25

>CR1-2

-----GGCGCCGCACTTCAAGAGGGATGTGGACAACATGGAGAGGGTCCAGAGGAGGGCCACTCGCATGATCAGGGGGCA  
GCAGGGCAGGCCCTACGAGGAGAGGCTACGGGACCTGAACC---TGTTT---AGCCTCCACAAGAGAAGGCTGAGGGGGG  
ATCTAGTGGCCTGTTACAAACTAGTCAGGGGGGACCAGCAGGCACTGGGGGAGTC--CCTGTTCCCCCGAGCACTGCCAG  
GAGTGACCAAGAAATAACGGTCAACAAGCTGGCAGAGGGTAGATTTCAGATTAGACATCAGGAGGGCCTACTTCACTGTGAG  
GGCGGCTAGGATCTGGAACCAACTTCCAAGCGAAGTGGTGTGGCTCCTACCCGAGGGGCTTTTAAAGAGGAGGCTGACG  
AWCACCTTGTGGGGTGGTTGACCCAGTACTCTTCTGCCATGGCAGGGGGTTCGGACTTGTATGATCTGCTCAGGTCC







TATGCAGCACAGTTCCCTATTTCTAGAGGTGC---CAAGTAGTCACTCTTCTCAGTAACTGGAAATAGGTGCTCATCACC  
TCCCAGTCAAGCCTGCTGTATTTCTGTCTTTTCTCCAAAAAC-----AGGATCTTTGTGGAGCGTG  
TGTGCTGGACCTGCCTGTTTCTCTACCAATCATCTGATCA-----GCAAGATCCTACTTAGCTGC---TGGACTCGATGA  
TCTCCCGAGGTCCCTTCCAGCCCTAATG-----TCTATGAAATCTA---TGA---CAGAACTGTGTCAACCACACTC  
TC---TTGCCGACGAATTTTACCCCGAGGTACGTGAAGC--GAGACAGAAAGAACAAGGGAGACAATGCTTAAATTAGGAA  
GAAAAGTTGCA-----TTGGATAGACACTG-TTTTCATGCTTCTGTGTACT-CCCTAAAATCCCTTACAAC  
TCTTCAGTAGTTTTTAGACAATGTCATTACACT-GGGCAACAC-AAATACTTACAAGCTGACTGCAGTATTT-AGCAAG  
A---TATTATTATTATTGCTGCTCTACTAAAATAGACCTGAAAAA-CCAGTTATTGCTCTGTGCATATTTATGAAACCCA  
AGACAAGATACTCCCATAT-GCTATTAATATCC---T-CTTA

>Cno  
CATCTGGG---CTGCAGCAGGGAACAAAAACCA---AGTCAGTGAGTGATTTACACC-TTCCT-----CCTGTCTATCA  
GGATCCAGCATCATTAGATGTATTT-ACTAGGAACAGTTAT-AACTTGGAAACACTTTGAGGTTCATCCTGGGGCATGAAG  
AATAGAATACCTTGTGGAACTCGGTGG---CCCCT-CTAGTTAA-CCAAAGTCATACTGATAGGCCTCC-AAAAGAACTC  
TCAGATATCCTCTG-TTGGGACAGAGATGGGAGGATACAGCCAAATCCTCAGGAGTCAATAAGGGGAC-----  
-AAAAGGGAAGAGGCCAAGAGCTACAGAGGCTCACAGGAAACACTATTT-----AAAAGCAATCCTGTT-  
TATGCAGCACAGTTCCCTATTTCTAGAGGTGC---CAAGTAGTCACTCTTCTCAGTAACTGGAAATAGGTGCTCATCACC  
TCCCAGTCAAGCCTGCTGTATTTCTGTCTTTGCTTTTCTCCAAAAAC-----AGGATCTTTGTGGAGCGTG  
TGTGCTGGACCTGCCTGTTTCTCTACCAATCATCTGATCA-----GCAAGATCCTACTTAGCTGC---TGGACTC---GA  
TCTCCCGAGGTCCCTTCCAGCCCTAATG-----TCTATGAAATCTA---TGA---CAGAACTGTGTCAACCACACTC  
TC---TTGCCGCAAGAATTTTACCCCGAGGTACGTGAAGC--GAGACAGAAAGAACAAGGGAGACAATGCTTAAATTAGGAA  
GAAAAGTTGCA-----TTGGATAGACACTG-TTTTCATGCTTCTGTGTACT-CCCTAAAATCCCTTACAAC  
TCTTCAGTAGTTTTTAGACAATGTCATTACACT-GGGCAACAC-AAATACTTACAAGCTGACTGCAGTATTT-AGCAAG  
A---TATTATTATTATTGCTGCTCTACTAAAATAGACCTGAAAAA-CCAGTTATTGCTCTGTGCATATTTATGAAACCCA  
AGACAAGATACTCCCATAT-GCTATTAATATCC---T-CTTA

>Cjo  
CATCTGGG---CTGCAGCAGGGAACAAAAACCA---AGTCAGTGAGTGATTTACACC-TTCCT-----CCTGTCTATCA  
GGATCCAGCATCATTAGATGTATTT-ACTAGGAACAGTTAT-AACTTGGAAACACTTTGAGGTTCATCCTGGGGCATGAAG  
AATAGAATACCTTGTGGAACTCAGTGG---CCCCT-CTAGTTAA-CCAAAGTCATACTGATAGGCCTCC-AAAAGAACTC  
TCAGATATCCTCTG-TTGGGACAGAGATGGGAGGATACAGCCAAATCCTCAGGAGTCAATAAGGGGAC-----  
-AAAAGGGAAGAGGCCAAGAGCTACAGAGGCTCACAGGAAACACTATTT-----AAAAGCAATCCTGTT-  
TATGCAGCACAGTTCCCTATTTCTAGAGGTGC---CAAGTAGTCACTCTTCTCAGTAACTGGAAATAGGTGCTCATCACC  
TCCCAGTCAAGCCTGCTGTATTTCTGTCTTTGCTTTTCTCCAAAAAC-----AGGATCTTTGTGGAGCGTG  
TGTGCTGGACCTGCCTGTTTCTCTACCAATCATCTGATCA-----GCAAGATCCTACTTAGCTGC---TGGACTCGATGA  
TCTCCCGAGGTCCCTTCCAGCCCTAATGTCATGAAATCTATGAAATCTA---TGA---CAGAACTGTGTCAACCACACTC  
TC---TTGCCGCAAGAATTTTACCCCGAGGTACGTGAAGC--GAGACAGAAAGAACAAGGGAGACAATGCTTAAATTAGGAA  
GAAAAGTTGCA-----TTGGATAGACACTG-TTTTCATGCTTCTGTGTACT-CCCTAAAATCCCTTACAAC  
TCTTCAGTAGTTTTTAGACAATGTCATTACACT-GGGCAACAC-AAATACTTACAAGCTGACTGCAGTATTT-AGCAAG  
A---TATTATTATTATTGCTGCTCTACTAAAATAGACCTGAAAAA-CCAGTTATTGCTCTGTGCATATTTATGAAACCCA  
AGACAAGATACTCCCATAT-GCTATTAATATCC---T-CTTA

>Ote  
CATCTGGG---CTGCAGCAGGGAACAAAAACCA---AGTCAGTGAGTGATTTACACC-TTCCT-----CCTGTCTATCA  
GGATCCAGCATCATTAGATGTATTT-ACTAGGAACAGTTAT-AACTTGGAAACACTTTGAGGTTCATCCTGGGGCATGAAG  
AATAGAATACCTTGTGGAACTCAGTGG---TCCCT-CTAGTCAA-CCAAAGTCATACTGATAGGCCTCC-AAAAGAACTC  
TCAGATATCCTCTG-TTGGGACAGAGATGGGAGGATAAAGCCAAATCCTCAGGAGTCAATAAGGGGAC-----  
-AAAAGGGAAGAGGCCAAGAGCTACAGAGGCTCACAGGAAACACTATTT-----AAAAGCAATCCTGTT-  
TATGTAGCACAGTTCCCTATTTCTAGAGGTGC---CAAGTAGTCACTCTTCTCAGTAACTGGAAATAGGTGCTCATCACC  
TCCCAGTCAAGCCTGCTGTATTTCTGTCTTTGCTTTTCTCCAAAAAC-----AGGTTCTTTGTGGAGCGTG  
TGTGCTGGACCTGCCTGTTTCTCTACCAATCATCTGATCA-----GCAAGATCCTACTTAGCTGC---  
-----TGCAGACAGAAC--TGTCAACCACACTC  
TC---TTGCCGCAAGAATTTTACCCCGAGGTACGTGAAGT--GAGACAGAAAGAACAAGGGAGACAATGCTTAAATTAGGAA  
GAAAAGTTGCA-----TTGGATAGACACTG-TTTTCATGCTTCTGTGTACT-CCCTAAAATCCCTTACAAC  
TCTTCAGTAGTTTTTAGACAATGTCATTACACT-GGGCAACAC-AAATACTTACAAGCTGACTGCAGTATTT-AGCAAG  
ATATTATTATTATTATTGCTGCTCTACTAAAATAGACCTGAAAAA-CCAGTTATTGCTCTGTGCATATTTATGAAACCCA  
AGACAAGATACTCCCATAT-GCTATTAATATCC---T-CTTA

>Tsc  
-----TTTCACNACCTTTCTTCC---CTGGTCTGTC  
GGATCCAGCATCATTAGATGCATTT-ACTAGGAACAGTTAT-AACTTGGAAACACTTTGAGGTTCATCCTGGGATGTGAAG  
AATAGAATACCTTGTGGAACTCAGTGG---TCCCT-CTAGTCAA-CCAAAGTCATACTGATAGGCCTCC-AAAAGAACTC  
TCAGACATCCTCTG-TTGGGACAGAGATGGGAGGATACAGCCAAATCCTCAGGAGTCAATAAGGGGAC-----  
-AAAAGGGAAGAGGCCAAGAGCTACAGAGGCTCACAGGAAATGCTATTT-----AAAAGCAATCCTGTT-  
TATACAGCACAGTTCCCTATTTCTAGAGGTGC---CAAGTAGTCACTCTTCTCAGTAACTGGAAATAGGTGCTCATCACC  
TCCCAGTCAAGCCTGCTGTATTTCTGCCTTTGCTTTTCTCCAAAAAC-----AGGATCTTTGTGGAGCATG  
TGTGCTGGACCTGCCTGTTTCTCTACCAATCATCTNATCA-----GCAAGATCCTACTTAGCTGC---  
-----TGCAGACAGAACTGTGTCAACCACACTC  
TC---TTGCCGCAACAATTTTACCCCGAGGTACGTGAAGCAGAGAGACAGAAAGAACAAGGGAGACAATGCTTAAATTAGGAA  
GAAAAGTTGCA-----TTGGATAGACACTG-TTTTCATGCTTCTGTGTACT-TCCTAAAATCCCTTACAAC  
TCTTCAGTAGTTTTTAGACAATGTCATTACACT-GGGTGACAC-AAATACTTACAAGCTGACTGCAGTATT-AGCAAG  
G---TATTATTATTACTACTACTAAAATAGACNTGAAAAA-CCAGTTATTGCTCTGTGCATATTTATGAAACCCA  
AGACAAGNCACTC-----

>Gga\_scaffold29835  
CATCTGGG---CTGCAGCAGGGAACAAAAACCA---AGTCAGTGAGTGATTTACACC-TTCCT-----CCTGTCTGTC  
GGATCCAGCATCATTAGATGCATTT-ACTAGGAACAGTTAT-AACTTGGAAACACTTTGAGGTTCATCCTGGGGTGTGAAG  
AATAGAATACCTTGTGGAACTCAGTGG---TCCCT-CTAGTCAA-CCAAAGTCATACTGATAGGCCTCC-AAAAGAACTC  
TCAGACATCCTCTG-TTGGGACAGAGATGGGAGGATACAGCCAAATCCTCAGGAGTCAATAAGGGGAC-----  
-AAAAGGGAAGAGGCCAAGAGCTACAGAGGCTCACAGGAAATGCTATTT-----AAAAGCAATCCTGTT-  
TATACAGCACAGTTCCCTATTTCTAGAGGTGC---CAAGTAGTCACTCTTCTCAGTAACTGGAAATAGGTGCTCATCACC  
TCCCAGTCAAGCCTGCTGTATTTCTGCCTTTGCTTTTCTCCAAAAAC-----AGGATCTTTGTGGAGCATG  
TGTGCTGGACCTGCCTGTTTCTCTACCAATCATCTNATCA-----GCAAGATCCTACTTAGCTGC---  
-----TGCAGACAGAACTGTGTCAACCACACTC  
TC---TTGCCGCAACAATTTTACCCCGAGGTACGTGAAGCAGAGAGACAGAAAGAACAAGGGAGACAATGCTTAAATTAGGAA  
GAAAAGTTGCA-----TTGGATAGACACTG-TTTTCATGCTTCTGTGTACT-TCCTAAAATCCCTTACAAC  
TCTTCAGTAGTTTTTAGACAATGTCATTACACT-GGGTGACAC-AAATACTTACAAGCTGACTGCAGTATT-AGCAAG  
G---TATTATTATTACTACTACTAAAATAGACNTGAAAAA-CCAGTTATTGCTCTGTGCATATTTATGAAACCCA  
AGACAAGNCACTC-----

-----TGCAGACAGAAGCTGTGTCAACCACACTC  
TC-TTGCACAAGAATTTTCACGCCAGGCTACGTGAAGCGAGAGACAGAAAGAACAAGGAGACAATGCTTAAATTAGGAA  
GAAAAGTTGCA-----TTGGATAGACACTG-TTTTCATGCTTCTGTGTACT-TCCTAAAAATCCCTTACAAC  
TCTTCAGTAGTTTTTAGACAATGTCATTACACT-GGGTGACAC-AAATACTTACAAGCTGACTGCAGTCATT-AGCAAG  
G---TATTATTATTACTGCACTACTAAAATAGACCTGAAAAA-CCAGTTATTGCTCTGTGCACATTTATGAAAACCCA  
AGACAAGACACTCCCATGTGCTTATTAATATCT---T-CTTA  
>Cya  
CATCTGGG---CTGTAGCAGGNAACAAAACGAAGTCAGTCAGTGAGTGATTCCACACCTT--CT-----TCCTCTGTCA  
GAATGCAGCGTCATTAGATGCATTT-ACTAAGAACAGTTATAAACTTGGGAACACTTAGGGGTATCCTGGGGTGTGAAG  
AGTAGAATAACCTTTTGCAGTCAGTGG---TCCCTCTAGTCAA-CCAAAGTCATACTGATAGGCCTAC-ACAAGGAGTC  
TCAGATATCCTGTG-TTGTGGTAGAGATGGGAGGATACAGCCAGATTCTCAGGAGTCAGTAAGGGGAC-----  
-AAAAGGGAAGAGGCCAAGAGCTACAGATGCCTTGTAGGAAACACTATGT-----AAAAACAATCTGT-  
TATGCAGCACAGTTCCTATTTCTAGAGGTGC---CAAGCAGTCACTCTTTTCAGTAAGTGGAAATAGGTGCTCATCACC  
TCCCAGTCAAGCCTGTGTATTTCTGCCTTTGCTTTTCTCCAAAAAC-----AGGATCTTTGTGGAGTGTG  
TGTGCTGGTACTGCCTATTTCTTACCAATCATCTGATCA----GCATGATCCTACTTAGCTGC-----  
-----TGCAGACAGAAGCTGCGTCAACCACACTC  
TC-TTGCACAAGAATTTTCACTCCAGGCTACGTGAAGCAAGAGACAGAAAGAACAAGGAGACAATGCCTAAAATTA-GAA  
GAAAAGTTGCA-----TTGGATAGACTG-TTTTCATGCTTCTGTATACT-TCCTAAAAATCCCTTACAAC  
TCTCGAGTAGTTTTTAGACAATGTCATTACAAT-GGGCAACAC-AAATACTTACAAGCTGACTGCAGTCATT-AGCAAG  
G---TATTATTAATATTGCTGCATTACTAAAATAGACCTGAAAAA-CCAGTTATTGCTCTTTCACATTTGNGGAAACCCA  
AGACAAGACACT-----  
>Mca  
CATCTGGG---CTGCAGCAGGAAACAAAACCA---AGTCAGTGAGTGATTTACACC-TTCCT-----CCTGTCTATCA  
GGATCCAGCATCATTAGATGATTTT-ACTAGGAACAGTTAT-AACTTGGAAACACTTTGAGGTATCCTGGGGCATGAAG  
AATAGAATAACCTTGTGCAACTCAGTGG---TCTCT-CTAGTCAA-CCAAAGTCATACTGATAGGCCTCC-AAAAGAAGTC  
TCAGATATCCTCTG-TTGGGACAGAGATGGGAAGATACAGCCAAATCCTCAGGAGTCAACAAGGGGAC-----  
-AAAAGGGAAGAGGCCAAGAGCTACAGAGCCTCAGAGCCAACTACTATTT-----AAAAGCAATCTGT-  
TATGCAGCACAGTTCCTATTTCTAGAGGTGC---CAAATAGTCACTCTTCTCAGTAAGTGGAAATAGGTGCTCATCACC  
TCCCAGTCAAGCCTGTGTATTTCTGTCTTTGCTTTTCTCCAAAAAC-----AGGATCTTTGTGGAAATG  
TGTCTGGACCTGCCTGTTTCTTACCAATCATCTGATCA----GCAAGATCCTACTTAGCTGC-----  
-----TGCAGACAGAAGCTGTGTCAACCACACTC  
TC-TTGCACAAGAATTTTCAACCCAGGCTACGTGAAGC--GAGACAGAAAGAACAAGGAGACAATGCTTAAATTAGGAA  
GAAAAGTTGCA-----TTGGATAGACACTG-TTTTCATGCTTCTGTGTACT-CCCTAAAAATCCCTTACAAC  
TCTTCAGTAGTTTTTAGACAATGTCATTACACT-GGGCAACAC-AAATACTTACAAGCTGACTGCAGTATTT-AGCAAG  
ATATTATTATTATTGCTGTCTTAAATAGACCTGAAAAA-CCAGTTATTGCTCTGTGCACATTTATGAAAACCCA  
AGACAAGATACTCCCATGT-GCTATTAATATCC---T-CTTA  
>Asi\_533473771  
CATCTGGG---CTGTAGCAGGAAACAAAACCAAGTCAGTCAATGAGTGATTCCACACCTT-CCT-----CCTGTGTCA  
GAATGCAGCATCATTAGATGCATTT-ACTAGGAACAGTTAT-AACTTGGGAACACTTTGGGGTATCCTGGGGTGTGAAG  
AGTAGAATAACCTTGTGCGACTCAGTGG---TCCCT-CTAGTCAA-CCAAAGTCATACTGACAGGCCTCC-AAAAGGAGTC  
TCAGATATCCTGTG-TTGGGATAGAGATGGGAGGATACAGCCAGATCCTCAGGAGTCAAGTAAGGGGAC-----  
-AAAAGGGAAGAGGCCA-----AGATGCCTCATAGGAAACACTATGT-----CAAAGCAATCTGT-  
TATGCAGCACAGTTCCTATTTCTAGAGGTGC---CAAGTAGTCACTCTTCTCAGTAAGTGGAAAT-----CACC  
TCCCAGTCAAGCCTGTGTATTTCTGCCTTTGCTTTTCTCCAAAAAC-----AGGATCTTTGTGGAAATGTG  
TGTGCTGGTCTGCCTATTTCTTACCAATCATCTGATCA----GCAAGATCCTACTTAGCTGC-----  
-----TGCAGACAGAAGCTGTGTCAACCACACTC  
TC-TTCCGCAAGAATTTTCAACCCAGGCTACGTGAAGC--GAGACAGAAAGAACAAGGAGACAATGCTTAAATTAGGAA  
GAAAAGTTGCA-----TTGGATAGACACTG-TTTTCATGCTTCTGTGTACT-CCCTAAAAATCCCTTACAAC  
TCTTCAGTAGTTTTTAGACAATGTCATTACAAT-GGGCAACAC-AAATACTTACAAGCTGACTGCAGTATTT-AGCAAG  
ATATTATTATTATTGCTGTCTTAAATAGACCTGAAAAA-CCAGTTATTGCTCTGTGCACATTTATGAAAACCCA  
AGACAAGATACTCCCATGT-GCTATTAATATCC---T-CTTA  
>Ami\_scaffold-5556  
CATCTGGG---CTGTAGCAGGAAACAAAACCAAGTCAGTCAGTGAGTGATTCCACACCTT-CCT-----CCTGTGTCA  
GAATGCAGCATCATTAGATGCATTT-ACTAGGAACAGTTAT-AACTTGGGAACACTTTGGGGTATCCTGGGGTGTGAAG  
AGTAGAATAACCTTGTGCGACTCAGTGG---TCCCT-CTAGTCAA-CCAAAGTCATACTGACAGGCCTCC-AAAAGGAGTC  
TCAGATATCCTGTG-TTGGGATAGAGATGGGAGGATACAGCCAGATCCTCAGGAGTCAAGTAAGGGGAC-----  
-AAAAGGGAAGAGGCCA-----AGATGCCTCATAGGAAACACTATGT-----AAAAGCAATCTGT-  
TATGCAGCACAGTTCCTATTTCTAGAGGTGC---CAAGTAGTCACTCTTCTCAGTAAGTGGAAAT-----CACC  
TCCCAGTCAAGCCTGTGTATTTCTGCCTTTGCTTTTCTCCAAAAAC-----AGGATCTTTGTGGAAATGTG  
TGTGCTGGTCTGCCTATTTCTTACCAATCATCTGATCA----GCAAGATCCTACTTAGCTGC-----  
-----TGCAGACAGAAGCTGTGTCAACCACACTC  
TC-TTCCGCAAGAATTTTCAACCCAGGCTACGTGAAGC--GAGACAGAAAGAACAAGGAGACAATGCTTAAATTAGGAA  
GAAAAGTTGCA-----TTGGATAGACACTG-TTTTCATGCTTCTGTGTACT-TCCTAAAAATCCCTTACAAC  
TCTTCAGTAGTTTTTAGACAATGTCATTACAAT-GGGCAACAC-AAATACTTACAAGCTGACTGCAGTATTT-AGCAAG  
G---TATTATTATTATTGCTGCCTACTAAAATAGACCTGAAAAA-CCAGTTATTGCTCTTTCACATTTATGAAAACCCA  
AGACAAGACACTCCCATGTGCTTATTAATATCC---T-CTTA  
>Gallus\_GB  
CATCTGGG---CTGCATGACAAGAATAAAAAA-ATAATTTAGCAAAGATTTTCTACTACTATGCTCCTTCTTAACCA  
GGATT-----TTTATTTACAGAGAAGAGATCT-CACTTGGAAACACTCCAGTGTCA-----  
-----GTAGAAAGCAGTAA-CCCCT-----TTTATGGGTTACT-----GTGGT  
TCAG-----TGGAAAGAGACAAGTAGATCCTCAATTAAGCAATTTTGTCCAAAG  
GGAAATAGAGAAGTCCAATGGCAATGTTACCTCAGGAGAAACCGTTTTTGGTGTGTGATATCAAGAACACCCCTGTTA  
CGTGACACATTTTCACTGCAGATGAAGCTATAGGTATCTTAACACTTCAATAGAAAAATTAACACAGG-----  
-----CTGTCTTTTCTTTTCCAGGAAATTTATATTGAACGGAGGTCCTTCTTATAGTCTA  
ACTGCTACTTCTGAAAAATACCTTCACTCAGCAGCCTTCTCAGTTACAAGGCTTTG-----GTGAGAACAGCAGCCACATGCTT  
TT-----CTCTCACCT-----TAGCTAAATAGGATACAGAACTGATGCTGAATATAACCT  
AAAGCATTACACAAACCTGAAGGCTGAATGGAGCCAAG-----AAGAAAAATCCATCACAAC



TACTATTCCACTTGGATGATTCAAGTAATGTGACTACTCCCTACATTTTGTCTTAG- AAATATCAGATTGCATCTATTC  
TGACTTTTTTC---ATATC---ATAGATTT-CATAGACATTAGGGCTGG-AAGGGACCTCGGGAGATCATCGAG---AT  
ATC---CGATATGAAAAAATT-ATTTGAACTTATCATTTGAAAAACATAAGAATACAATT-AATGAAGAATGAACGTGA-A  
TTTTTA-----AAGAAGCAGAAT--TTG-TCATTAGGA--TTATTAGCAAAACATAAGGGTACTGATAAGTGATAATAT  
CCTACTCCTTCCCTCCACCTTTTTCCCATGATTTCATCCTAAGACACAGCATC-TTTGAGATGCG-CTGTCTTTGAGGGGA  
AAAAATAAAGGTTAG--ATATCTGTTCTTTAATGTAGTTCAAAATAAATGTAGTCCTT--ATCCCTCCAATGCCTTTA  
>Cno  
-----AAAAGCATCATCAAGCAGAGATATTTAAAGATACAGAATCTTTAAAAA-----GGCTGTCCG  
GATTTACAATACATGTACTTTATTTTTTATGGCAGGTGACTAACTTCTCAACCTTAGTGGATCAAATTTACGTTTCCATA  
AGTTCAAGTAGAATAAACCATTAACAACAAAAATGGTGATAAATTCCTCACTGATTTTTGGTTTGAAGAGCGTCAAGACT  
TAAGATGATTGAATTCAGGTGACTTAATATTGGCACAGAA-----TTTTTCATA-----  
-----TATTGTATTTCCCGATTTGCTGTATCCCCAG-AAAAAGATAAATTCAGAAAT  
ATTCTTCATGGCAACACCATGGTTTTGGTCCTT-TCTGGGGCTCAATA-----AGCTAATTTTCACTTTATATTC  
TTGGAACAGATATATT-AAGTCAACCATTAAGAGAACTTTAACATTAACATATTAATTTAGGTTA-CAAAGAAATTAATA  
TTCCCTTAGATAAAAACAACTGAGTTCCCTTTGCCATCACACAGCATTTTAAAGAAAGCTGTTGCCATTATGAAAAATTA  
ATTACTGTTTAACTGAAATTAATTTACAACCTGGAACAGAAAGTAAT-AAAAAATGCT---ACACACACACTAAATGGCAC  
TACTATTCCACTTGGATGATTCAAGTAATGTGACTACTCCCTATATTTTGTCTTAG-AAATATCAGATTGCATCTATTC  
TGACTTTTTTC---ATATC---ATAGATTT-CATAGACATTAGGGCTGG-AAGGGACCTCGGGAGATCATCGAG---AT  
ATC---CGATATGAAAAAATT-ATTTGAACTTATCATTTGAAAAACATAAGAATACAATT-AATGAAGAATGAACGTGA-A  
TTTTTA-----AAGAAGCAGAAT--TTG-TCATTAGGA--TTATTAGCAAAACATAAGGGTACTGATAAGTGATAATAT  
CCTGCTCCTTCCCTCCACCTTTTTCCCATGATTTCATCCTAAGACACAGCATC-TTTGAGATGCG-CTGTCTTTGAGGGGA  
AAAAATAAAGGTTAG--ATATCTGTTCTTTAATGTAGTTCAAAATAAATGTAGNCCTTTATCCCTNCGATGCCTTTA  
>Cjo  
-----CAGAATCTTTAAAAA-----GGCTGTCTG  
GATTTACAATACATGTACTTTATTTTTTATGGCAGGTGACTAACTTCTCAACCTTAGTGGATCAAATTTACCTTTCCATA  
AGTTCAACTAGAATAAACCATTAACAACAAAAATGGTGATAAATTCCTCACTGATTTTTGGTTTGAAGAGCGTCAAGACT  
TAAGATGATTGAATTCAGGTGACTTAATATTGGCACAGAA-----TTTTTCATA-----  
-----TATTGTATTTCCCGATTTGCTGTATCCCCAG-AAAAAGATAAATTCAGAAAT  
ATTCTTCATGGCAACACCATGGTTTTGGTCCTT-TCTGGGGCTCAATA-----AGCTAATTTTCACTTTATATTC  
TTGGAACAGATATATT-AAGTCAACCATTAAGAGAACTTTAACATTAACATATTAATTTAGGTTA-CAAAGAAATTAATA  
TTCCCTTAGATAAAAACAACTGAGTTCCCTTTGCCATCACACAGCATTTTAAAGAAAGCTGTTGCCATTATGAAAAATCA  
ATTACTGTTTAACTGAAATTAATTTACAACCTGGAACAGAAAGTAAT-AAAAAATGCT---ACACACACACTAAATGGCAC  
TACTATTCCACTTGGATGATTCAAGTAATGTGACTACTCCCTATAGTTTGTCTTAGAAAAATATCAGATTGCATCTATTC  
TGACTTTTTTC---ATATC---ATAGATTTCCATAGACATTAGGGCTGGAAAGGGACCTCGGGAGATCATCGAG---AT  
ATC---CGATATGAAAAAATT-ATTTGAACTTATCATTTGAAAAACATAAGAATACAATT-AATGAAGAATGAACGTGA-A  
TTTTTA-----AAGAAGCAGAAT--TTG-TCATTAGGA--TTATTAGCAAAACATAAGGGTACTGATAAGTGATAATAT  
CCTGCTCCTTCCCTCCACCTTTTTCCCATGATTTCATCCTAAGACACAGCATC-TTTGAGATGCG-CTATCTTTGAGGGGA  
AAAAATAAAGGTTAG--ATATCTGTTCTTTAATGTAGTTCAAAA-----  
>Ote  
ATACAAA---CTGAAAAGCATCATCAAGCAGAGATATTTAAAGATACAGAATCTTTAAAAA-----GGCTGTCTG  
GATTTACAATACATGTACTTTATTTTTTATGGCAGGTGACTAACTTCTCAACCTTAGTGGATCAA- TTGCCTTTCCATA  
AGTTCAACTAGAATAAACCATTAACAACAAAAATGGTGATAAATTCCTCACTGA-TTTTGGNTTGAAGAGTGTCAAGACT  
TAAGATGATTGAATTCAGGTGACTTAATATTGGCACAGAA-----TTTTTCATA-----  
-----TATTGTATTTCCCGATTTGCTGTATCCCCAG---AAGATAAATTCAGAAAT  
ATTCTTCATGGCAACACCATGGTTTTGGTCCTT-TCTGGGGCTCAATA-----AGCTAATTTTCACTTTATATTC  
TTGGAACAGATATATT-AAGTCAACCATTAAGAGAACTTTAACATTAACATATTAATTTAGGTTA-CAAAGAAATTAATA  
TTCCCTTAGATAAAAACAACTGAGTTCCCTTTGCCATCACACAGCATTTTAAAGAAAGCTGTTGCCATTATGAAAAATTA  
ATTACTGTTTAACTGAAATTAATTTACAACCTGGAACAGAAAGTAAT-AAAAAATGCT---ACACACACACTAAATGGCAC  
TACTATTCCACTTGGATGATTCAAGTAATGTGACTACTCCCTATATTTTGTCTTAG-AAATATCAGATTGCATCTATTC  
TGACTTTTTTC---ATATC---ATAGATTTCCATAGACATTAGGGCTGGAAAGGGACCTCGGGAGATCATCGAG---AT  
ATC---CGATATGAAAAAATT-ATTTGAACTTATCATTTGAAAAACATAAGAATACAATT-AATGAAGAATGAACGTGA-A  
TTTTTA-----AAGAAGCAGAAT--TTG-TCATTAGGA--TTATTAGCAAAACATAAGGGTACTGATAAGTGATAATAT  
CCTGCTCCTTCCCTCCACCTTTTTCCCATGATTTCATCCTAAGACACAGCATC-TTTGAGATGCG-CTGTCTTTGAGGGGA  
AAAAATAAAGGTTAG--ATATCTGTTCTTTAAGTAGTTCAAGATAAATGTAGTCCTT--ATCCCTCCAATGCCTTTA  
>Mca  
ATNCAAAA---CTGAAAAGCATCATCAAGCAGANATATTTAAAGATNCAAGATCTTTAAAAA-----GGCTGTCTG  
GATTTACAATACATGTACTTTATTTTTTATGGCAGGTGACTAACTTCTCAACCTTAGTGGATCAAATTTGCCTTTCCATA  
AGTTCAACTAGAATAAACCATTAACAACAAAAATGGTGATAAATTCCTCACTGATTTTTGGTTTGAAGAGTGTCAAGACT  
TAAGATGATTGAATTCAGGTGACTTAATATTGGCACAGAA-----TTTTTCATA-----  
-----TATTGTATTTCCCGATTTGCTGTATCCCCAG-AAGAAGATAAATTCAGAAAT  
ATTCTTCATGGCAACACCATGGTTTTGGTCCTT-TCTGGGGCTCAATA-----AGCTAATTTTCTTTTATATTC  
TTGGAACAGATCTATT-AAGTCAACCATTAAGAGAACTTTAACATTAACATATTAATTTAGGTTA-CAAAGAAATTAATA  
TTCCCTTAGATAAAAACAACTGAGTTCCCTTTGCCATCACACAGCATTTTAAAGAAAGCTGTTGCCATTATGAAAAATTA  
ATTACTGTTTAACTGAAATTAATTTACAACCTGGAACAGAAAGTAAT-AAAAAATGCT---ACACACACACTAAATGGCAC  
TACTATTCCACTTGGATGATTCAAGTAATGTGACTACTCCCTATATTTTGTCTTAG-AAATATCAGATTGCATCTATTC  
TGACTTTTTTC---ATATC---ATAGATTTCCATAGACATTAGGGCTGGAAAGGGACCTCGGGAGATCATCGAG---CT  
ATC---CGATATGAAAAAATT-ATTTGAACTTATCATTTGAAAAACATAAGAATACAATT-AATGAAGAATGAACGTGA-A  
TTTTTA-----AAGAAGCAGAAT--TTG-TCATTAGGA--TTATTAGCAAAACATAAGGGTACTGATAAGTGATAATAT  
CCTGCTCCTTCCCTCCACCTTTTTCCCATGATTTCATCCTAAGACACAGCATC-TTTGAGATGCG-CTGTCTTTGAGGGGA  
AAAAATAAAGGTTAGCATATCCTGTTCTTTAAGTAGTTCAAGATAAATGTAGTCCTT--ATCCCTCCAATGCCTTTA  
>Tsc  
ATACAAA---CTGAAAAGCATCATCAAGCAGAGATATTTAAAGATACAGAATCTTTAAAAA-----GGCTGTCTG  
GATTTATAATACATGTACTTTATTTTTTATGGCAGGTGACTAACTTCTCAACCTTGGTGGATCAAATTTGCCTTTCCGTA  
AGTTCAACTAGAATAAACCATTAACAACAAAAATGGTGATAAATTCCTCACTGATTTTTGGTTTGAAGAGTGTCAAGACT  
CAAGATGATTAAATTCAGGTGACTTAATATTGGCACAGGA-----TTTTTCATA-----  
-----TATTGTATTTCCCGATTTGTTGATCCCCAG-AAAAAGATAAATTCAGAAAT  
ATTCTTCATGGCAACACTGTGGTTTTGGTCCTT-TCTGGGGCTCGATA-----AGCTAATTTTCACTTTTATATTC  
TTGGAACAGATATATT-AAGTCAACCATTAAGAGAACTTTAACATTAACATATTAATTTAGGTTA-CAAAGAAATTAATA

TTCCCTTAGATAAAAACTGAGTTTCCCTTTGCCATCACACAGCATTTTAAAGAAAGCTGTTGCCATTATGAAAAATTA  
ATTACTGTTTAACTGAAATTAATTTACAACAGGAACAGAAAGTAATAAAAAATGCT---ACACACACTAAATGGC  
TACTATTCCACTTGGATGATTCAGTAATGTGACTATTCCCTATATTTTGTTCAG-AAATATCAGATTGCATCTATT  
TGCTCTTTTTTC-----AT  
ATC---CGATATGAAAAAATT-ATTTGAACCTCATCATGAAAACATAAGAATACAATT-AATGAAGAATGAACGTGATA  
TTTTTA-----AAGAAGTAGAAT--TTG-TCATCAGGA--TTATTAGCAAAACATAAGGGTACTGATAAGTGATAAT  
CCTGCTCCTTCCCTCCACTTTTTCCCATGATTATCCTTAAGACACAGCATC-TTTGAGATGCA-TTGTCTTTGAGGGGA  
AAAATAAAAGGTTAG--ATATCTGTTCTTAAATGTAGTCAAATAAAA--TTAGTCCTT--ATCCTTCCAATGTCTTTA  
>Gga\_scaffold11806  
ATACAAA---CTGAAAAGCATCATCAGGCAGAGATATTAAAAGATACAGAATCCTTAAAAA-----GGCTGTCTG  
GATTTACAATACATGTACTTTATTTTTATGGCAGGTGACTAACTTCTCAACCTTGGTGGATCAAATTTGCCTTTCCGTA  
AGTTCAACTAGATAAACCATTAAACAAAAAATGGTGATAAATTCCTCACTGATTTTTGGTTTGAAGAGTGTCAAGACT  
CAAGATGATTAATTCAGGGTGAATTAATATTGGCACAGGA-----TTTTTCATA-----  
-----TATTGTATTTCCCGATTTGTTGATCCCCAG-AAAAAGATAAATTCAGAAAT  
ATTCTTCATGGCAACACTGTGGTTTGGTCCTT-TCTGGGGCTCAATA-----AGCTAATTTTCACTTTTATATTC  
TTGGAACAGATATATT-AAGTCAACCATTAAAGAGAACTTTAAACATTAACATATTAATTTAGGTTA-CAAAGAAATTAATA  
TTCCCTTAGATAAAAACTGAGTTTCCCTTTGCCATCACACAGCATTTTAAAGAAAGATGTTGCCATTATGAATAATTTA  
ATTACTGTTTAACTGAAATTAATTTACAACAGGAACAGAAAGTAATAAAAAAATGCTACACACACACACTAAGTGGC  
TACTATTCCACTTGGATGATTCAGTAATGTGACTATTCCCTATATTTTGTTCCTAG-AAATATCAGATTGCATCTATT  
TGACTTTTTTC-----AT  
ATC---TGATATGAAAAAATT-ATTTGAACCTCATCCTGAAAACATAAGAAAACAATT-AATGAAGAATGAACGTGATA  
TTTTTA-----AAGAAGTAGAAT--TTG-TCATCAGGA--TTATTAGCAAAACATAAGGGTACTGATAAGTGATAAT  
CCTGCTCCTTCCCTCCACTTTTTCCCATGATTATCCTTAAGACACAGCATC-TTTGAGATGCA-TTGTCTTTGAGGGGA  
AAAATAAAAGGTTAG--ATCTCTGTTCTTAAATGTAGTTCAAATAAATTTAGTCCTT--ATCCTTCCAATGTCTTTA  
>Cya  
-----AAAGATACAGAGTCTTAAAAA-----GGCTGTATG  
GATTTACAATACATGTACTTTAATTTTTATGGCAGGTAACACTGCTCCTCAACCTTGGTAGATCAAATTTGCCTTTCCGTA  
AGTTCAAGTAGATAAAGCATTAACAAAAAATGGTGATAAATTCCTCACTATTTTTGGTTTAGCAGTGTTTAATACT  
CCCGATGATTAATTCAGGGCAACTTAATACTGGCACAGAAATTTTTTTTTTATT-----  
-----TATTGGGGTTCCCGATTTGGTGAACCCCA-AAAAAGATAAATTCAGAAAT  
ATTCTTCACAGAAACACCGTGGTTTGGTCCTT-TCTGGGGCTGATA-----AGCTAATTTTCACTTTTATATTC  
TTGGAACAGATATATTAAAGCTAGCCATTAAAGAGAACTTTAAACATTAACGT---ATTTAGGTTA-CATAGAAATTAATA  
TTCCCTTAGATAAAAAGAAATAAGTTGCCATTGACATCAGAAAGCATTTTAAAAAAGCTGTTGCCATTATGAAAAATTA  
ATTACTGTTTAACTTTAATTA---ACAGCAGGGACAGAAAGTAAT--AAAAATGCT---ACACACACTAAATAGCAC  
TACTATTGCACCTGGATGAGTCAAGTAACGTGACTATTCCCAATATTTGTTCTTAG-AAGTATCAAATGCATCTAGTC  
TGACTTTTTTC-----AT  
ATC---CCATATGAAAAAATT-ATTTGAATCTAATCATGAAAACACAAGGATACAATT-ACTGAAGAAGCAACTGAA-G  
TTTTTT-----AAAAAGTAGGCT--T---TTATCAGGA--TTATTAGCCAATCATAAGGGTACTG---AGTGATAAT  
CCTGCTCCTTCCCTACCTTTTTTGGCATGATTATCCTTAAGACACAGCATC-----TTTGGGGGA  
AAAATGAGAGGCTAG--ATACCTGTTCTTGTAGTGTAGT-CAAATAAAA-----  
>Asi\_533457734|gb|AVPB01021305.1|\_36473-36740  
ATACAAA---CTGAAAAGCATCATCAAGCAAAGATATTAAAAGATACAGAGTCTTAAAAA-----GGCTGTATG  
GATTTACAATACATGTACTTTAATTTTTATGGCAGGTGACTAACTTCTCAACCTTGGTAGATCAAATTTGCCTTTCCATA  
AGTTCAACTAGATAAACCATTAAACAAAAAATGGTGATAAATTCCTCACTAATTTTTGGTTTAGCAGTGTGTTAATACT  
CCGGATGATTAATTCAGGGTGAATTAATATTGGCACAGAA-----TTTTTTTATA-----  
-----TATTGTATTTCCCGATTTGTTGATCTCCAG-AAAAAGATAAATTCAGAAAT  
ATTCTTCACAGAAACACCGTGGTTTGGTCCTT-TCTGGGGCTGATA-----AGCTAATTTTCACTTTTATATTC  
TTGGAACAGATATATT-AAGCTAGCCATTAAAGAGAACTTTAAACATTAATGTAATAATTTAGGTTA-CATAGAAATTAATA  
TTCCCTTAGATAAAAAGAAATTAATTTGCCCTTTGACATCA-ACAGCATTTTAAAGAAAGCTGTTGCCATTATGAAAAATTA  
ATTACTGTTTAACTTTAATTA---ACAGCAGGGACAGAAAGTAAT--AAAAATGCTACACACACAC---TAAATAGCAC  
TACTATTCCACTTGGATGATTCAGTAACGTGACTATTCCCAATATTTGTTCTTAG-AAGTATCAAATGCATCTACTC  
TGACTTTTTTC-----AT  
ATC---CGATATGAAAAAATTATTTGAACCTAATCATGAAAACATAAGGATACAATT-AATGAAGAATGAACGTGTA-A  
TTTTTT-----AAAAAGTACGAT--TTT-TCATCAGGA--TTATTAGCAAAACATAAGGGTACTGATGAGTGATAAT  
CCTGCTCC-TCCCTTACCTTTTTTGGCATGATTATCCTTAAGACATAGCATC-----TTTTGGGGGA  
AAAATAAGAGGCTAG--ATATCTGTTCTTGGTGTAGTTCAAATAAATTTAGTCCTT--ATCCTTCCAATGTCTTTA  
>Ami\_scaffold-2097  
ATACAAA---CTGAAAAGCATCATCAAGCAAAGATATTAAAAGATACAGAGTCTTAAAAA-----GGCTGTATG  
GATTTACAATACATGTACTTTAATTTTTATGGCAGGTGACTAACTTCTCAACCTTGGTAGATCAAATTTGCCTTTCTGTA  
AGTTCAACTAGATAAACCATTAAACAAAAAATGGTGATAAATTCCTCACTAATTTTTGGTTTAGCAGTGTGTTAATACT  
CCCGATGATTAATTCAGGGTGAATTAATATTGGCACAGAA-----TTTTTTTATA-----  
-----TATTGTACTTCCCGATTTGTTGATCCCCAG-AAAAAGATAAATTCAGAAAT  
ATTCTTCACAGAAACACCGTGGTTTGGTCCTT-TTTGGGGCTGATA-----AGCTAATTTTCACTTTTATATTC  
TTGGAACAGATATATT-AAGCTAGCCATTAAAGAGAACTTTAAACATTAACGTATTAATTTAGGTTA-CATAGAAATTAATA  
TTCCCTTAGATAAAAAGAAATTAAGTCCCTTTGACATCA-ACAGCATTTTAAAGAAAGCTGTTGCCATTATGAAAAATTA  
ATTACTGTTTAACTTTAATTA---ACAGCAGGGACACAGAAAGTAAT--AAAAATGCTACACACACACACTAAATAGCAC  
TACTATTCCACTTGGATGATTCAGTAACGTGACTATTCCCAATATTTGTTCTTAG-AAGTATCAAATGCATCTACTC  
TGACTTTTTTC-----AT  
ATC---CGATATGAAAAAATTATTTGAACCTAATCATGAAAACATAAGGATACAATT-AATGAAGAATGAACGTGTA-A  
TTTTTT-----AAAAAGTACGAT--TTT-TCATCAGGA--TTATTAGCAAAACATAAGGGTACTGTTGAGTGATAAT  
CCTGCTCC-TCCCTTACCTTTTTTGGCATGATTATCCTTAAGACATAGCATC-----TTTTGGGGGA  
AAAATAAGAGGCTAG--ATATCTGTTCTTGGTGTAGTTCAAATAAATTTAGTCCTT--ATCCTTCCAATGTCTTTA  
>Gallus\_GB  
AAACAAA---CTGAAAAGAAATCATCACGCACCAGTATTAAAAGGTAAGTCTCAAAAAAAAAAAAAACAAGATAAACATTTA  
GATTTACAGATGTAATACCCATCATCAAAAAAAGTTGTTCA-----AACTGCAGTCAGCCAAATTTTTCTTATCAGC  
AGTTCCAGCTGTAGTAAGCAGATGAATACATAGTACTTGCA-----TACGATCTTGAATTAGAG-----GAGCC  
CAAGATTGATCAGAGCAAGATGATTTAGCATACCAGCCATTTTTGTTTCCAGCAGCTACAACCCGCTGCTTCTAGAGATG  
AAGTTCCAGTTTCCATAGCTGATATTGTGCTGTACGTTAGCTTTTTTGTGTGCTATTTA-AAAGGGATAAGAGAGA---

---TTGAAAGAAAAACTTTGCTTTTGTTTTTT-ITTGTTTGTGGTTATTACTATTTCAAATTATTTTCATT---TATTG  
TTTAAA-----AAGTCAATCATCAAGAAAACTATCATTTACTCCTTTTCATGAGAGCAACCACAAAACGAATC  
AACTCTGGATTTAAA-----ACACACTGCAGGAAAAAAGAAAGTTCTACGATCA-----  
---TCTGCTTAGCCAAGAGTA---AGCACTAGAACAGATATCTT--AAGAATATTCCA-GCACCTACACTA-----  
-----TTCAAATGTGACCACCTCACTATAACTTGGAAAAAATGTATTTAAGTTTATAACTTTTT  
TTTTTTTTTTTGGCAA-----AT  
ATT---TGGGATTAACCTGTCTTCTTAAA-----GAAACCTAGGTCAATCAACAGAAAGGAAATACAGTGT-T  
CTCTTATTTGACAAGTTGCAAAATCATTTGTGTATGATGGTTTTTGGCAAC-----AGGCGAACAGGCATGAGATTCCCA  
GACAGAATTTCTCTCACTCTTCATAATTAATTTAGGTAA-----CTTTCTGTTCAGCAGTTATTAGGAGCT  
GAAA-CAGA-----GCTCCTACAATCTGGATTAGTCGCAGA-----

## CP07

>CR1-2C

-----GCACCTACATTGAACAC  
CTTCAAGAGCAAA-----T--TG--GATGCTTATCTTGCTGGGATCCTATGACCCAGCTGACTTCTCTGC  
CCTTCGGGCGGGGGCTGGACTCGATGATCTTCCGAGTCCCCTCCAGCCCTAATGTCTATGAAATCTA---TG-----  
AAA-----

>Exon

TTACAG-----

>Cpo\_933\_60850-62400

TTACAG---GTAAGGCACTTACCAGCTCCGGGGAGAGGGGGTGTAGTAAAGCTGTCTCCT--TAGTGCTGGGGATCCACTTG  
CGCTGCATGATGTGCCAATCGGCAGGAGAAGGAAGCATCTTGGTGCCTGTGGAGGTACAG-TTTGCTGCGTACAAATA  
AGTGAGTTGTGTGTCAGCCGGACACCTTT--TG--GATGCTTATCTTGCTGGGATCCTATGACCCAGCTGACTTCTCTGC  
CCTTTGGGCAGGGGGCTGGACTCAGTGTCTCCGAGGTCCCCTCCAGCCCTAATGTCTATGAAATCTA---TG---CCT  
TGTGGCTTGACCTCCTGTGTGGCCGCGGGAGCAGA-----CAC  
CACACGCAGTGACAGTGTCTCGTTGCCG-----CCCTCCTGTCCGTAGGTGCGTGAGGA-----GA  
GCCCGGCCTTTACGGCCCTCAGGTTCTGCGCTGAGGC-TTGCCCAAGAGGTTTGATATTTGTGCGGCTGCCATGGTGGC  
-----CATCTTTGCGGGTCAGCTCAAGC---AGGACCTGGCTTGAGTT  
TCACTTTTAAGATGCTTGAATAATGTCAAGTCCCTTTATAATGAGGCTTTTGTGAGCGTGTCTTGAACCTGCAGCTC-----  
-----ATGCAGTGTAGACTCTGCTTTCCTCCCTTCCCTAAGCCAGAGTCAAGTGTCTGCTCCTGTTGCCAGCTGTT-GAT  
TGCTTTACC-----TATAGCCGGAGGATTACACTAAGAATGGAGTGTTTTGGGACAGTAACGCAGACTTACTGAGGCT  
TCTCTCTCCTCTCTTGATTCCA

>Cni

TTACAG---GTAAGGCACTTACCAGCTCCGGGGAGAGGGGGTGTAGTAAAGCTGTCTCCT--TAGTGCTGGGGATCCACTTG  
CGCTGCATGATGTGCCAATCAGCAGGAGAAGGAAGCATCTTGGTGCCTGTGGAGGTACAG-TTTGCTGCGTACAAATA  
AGTGAGTTGTGTGTCAGCCGGACACCTTT--TG--GATGCTTATCTTGCTGGGATCCTATGACCCAGCTGACTTCTCTGC  
CCTTTGGGCAGGGGGCTGGACTCAGTGTCTCCGAGGTCCCCTCCAGCCCTAATGTCTATGAAATCTA---TG---CCT  
TGTGGCTTGACCTCCTGTGTGGCTGCGGGAGCAGA-----CAC  
CACACGCAGTGACAGTGTCTCGTTGCCG-----CCCTCCTGTCCGTAGGTGCGTGAGGA-----GA  
GCCCGGCCTTTACGGCCCTCAGGTTCTGCTGCTGAGGC-TTGCCCAAGAGGTTTGATATTTGTGCGGACTGCCATGGTGGC  
-----CATCTTTGCGGGTCAGCTCAAGC---AGGACCTGGCTTGAGTT  
TCACTTTTAAGATGCTTGAATAATGTCAAGTCCCTTTATAATGAGGCTTTTGTGAGCGTGTCTTGAACCTGCAGCTC-----  
-----ATGCAGTGTAGACTCTGCTTTCCTCCCTTCCCTAAGCCAGAGTCAAGTGTCTGCTCCTGTTGCCAGCTGTT-GAT  
TGCTTTACC-----TATAGCCGGAGGATTACACTAAGAATGGAGTGTTTTGGGACAGCAGCGCAGACTTACTGAGGCT  
TCTCTCTCCTCTCTTGATTCCA

>Cno

TTACAG---GTAAGGCACTTACCAGCTCCGGGGAGAGGGGGTGTAGTAAAGCTGTCTCCT--TAGTGCTGGGGATCCACTTG  
CGCTGCATGATGTGCCAATCGGCAGGAGAAGGAAGCATCTTGGTGCCTGTGGAGGTACAG-TTTGCTGCGTACAAATA  
AGTGAGTTGTGTGTCAGCCGGACACCTTT--TG--GATGCTTATCTTGCTGGGATCCTATGACCCAGCTGACTTCTCTGC  
CCTTTGGGCAGGGGGCTGGACTCAGTGTCTCCGAGGTCCCCTCCAGCCCTAATGTCTATGAAATCTA---TG---CCT  
TGTGGCTTGACCTCCTGTGTGGCTGCGGGAGCAGA-----CAC  
CACACGCAGTGACAGTGTCTCGTTGCCG-----CCCTCCTGTCCGTAGGTGCGTGAGGA-----GA  
GCCCGGCCTTTACGGCCCTCAGGTTCTGCGCTGAGGC-TTGCCCAAGAGGTTTGATATTTGTGCGGACTGCCATGGTGGC  
-----CATCTTTGCGGGTCAGCTCAAGC---AGGACCTGGCTTGAGTT  
TCACTTTTAAGATGCTTGAATAATGTCAAGTCCCTTTATAATGAGGCTTTTGTGAGCGTGTCTTGAACCTGCAGCTC-----  
-----ATGCAGTAAACTCTGCTTTCCTCCCTTCCCTAAGCCAGAGTCAAGTGTCTGCTCCTGTTGCCAGCTGTT-GAT  
TGCTTTACC-----TATAGCCGGAGGATTACACTAAGAATGGAGTGTTTTGGGACAGCAACGCAGACTTACTGAGGCT  
TCTCTCTCCTCTCTTGATTCCA

>Cjo



TTACAG---GTAAGGCACCTTACCAGCTCCGGGGAGAGGGGGTGTAGTAAAGCTGTCCTC--TAGTGCTGGGGATCCACTTG  
CACTGCGATGATGTGCCCAATCGGCAGGAGAAGGAAGCATCTTGGTGCCTGTGGAGGTACAG-TTGCTGCGTACAAATA  
AGTGAGTTGTGTGCTGAGCTGGACACCTTT---TG---GATGCTTATCTTGTGGGATCCTATGACCCAGCTGACTTCTGCTG  
CCTTTGGGCAGGGGGCTGGACTCAGTGTCTCCCGAGGTCCCTTCCAGCCCTAATGTCTATGAAATCTA---TG---CCT  
TGTGGCTTGACCTCGTGTGTGGCCGCGGGAGCAGA-----CAC  
CACACGCAGTGACAGTGTCTGTTGCCG-----CCCTCCTGTCCGTAGGTGCGTGAGGA-----GA  
GCCCGGCTTTACGGCCCTCAGGTTCTGCGCTGAGGC-TTGCCCCAAGAGGTTTGATATTTGTGCGACTGCCATGGTGGC  
-----CATTTTTGCGGGTCAGCTCAAGC---AGGACCTGGCTTGAGTT  
TCACTTTTAAGATGCTTGAATAATGTCAAGTCCCTTTATAATGAGGCTTTTGTGCGTGTGTTGAACCTGCGGCTC-----  
-----ATGCAGGTAACTCTGCTTTCCCTCCCTTCCCTAAGCCAGAGTCAAGTGTCTGCTCCTGTTTGGCAGCTGTT-GAT  
TGCTTTACC-----TATAGCCGGAGGATTACACTAAGAATGGAGTGTTTTGGGACAGCAACGCAGACTTACTGAGGCT  
TCTCTCTCTCTCTTGATTCCA

>Ote

TTACAG---GTAAGGCACCTTACCAGCTCCGGGGAGAGGGGGTGTAGTAAAGCTGTCCTC--TAGTGCTGGGGATCCACTTG  
CGCTGCGATGATGTGCCCAATCGACAGGAGAAGGAAGCATCTTGGTGCCTGTGGAGGTACAG-TTGCTGCGTACAAATA  
AGTGAGTTGTGTGCTGAGCCGGACACCTTT-----TG---CCT  
TGTGGCTTGACCTCCTGTGTGGCCGCGGGAGCAGA-----CAC  
CACACGCAGTGACAGTGTCTGTTGCCG-----CCCTCCTGTCCGTAGGTGCGTGAGGA-----GA  
GCCCGGCTTTACGGCCCTCAGGTTCTGCGCTGAGGC-TTGCCCCAAGAGGTTTGATATTTGTGCGACTGCCATGGTGGC  
-----CATCTTTGCGGGTCAGCTCAAGC---AGGACCTGGCTTGAGTT  
TCACTTTTAAGATGCTTGAATAATGTCAAGTCCCTTTATAATGAGGCTTTTGTGCGTGTGTTGAACCTGCGGCTC-----  
-----ATGCAGGTAGACTCTGCTTTCCCTCCCTTCCCTAAGCCAGAGTCAAGTGTCTGCTCCTGTTTGGCAGCTGTT-GAT  
TGCTTTACC-----TATAGCCGGAGGATTACACTAAGAATGGAGTGTTTTGGGAAAGCAACGCAGACTTACTGAGGCT  
TCTCTCTCTCTCTTGATTCCA

>Mca

TTACAG---GTAAGGCACCTTACCAGCTCCGGGGAGAGGGGGTGTAGTAAAGCTGTCCTC--TAGTGCTGGGGATCCACTTG  
CGCTGCGATGATGTGCCCAATCGACAGGAGAAGGAAGCATCTTGGTGCCTGTGGAGGTACAG-TTGCTGCGTACAAATA  
AGTGAGTTGTGTGCTGAGCCGGACACCTTT-----TG---CCT  
TGTGGCTTGACCTCCTGTGTGGCCGCGGGAGCAGA-----CAC  
CACACGCAGTGACAGTGTCTGTTGCCG-----CCCTCCTGTCCGTAGGTGCGTGAGGA-----GA  
GCCCGGCTTTACGGCCCTCAGGTTCTGCGCTGAGGC-TTGCCCCAAGAGGTTTGATATTTGTGCGACTGCCATGGTGGC  
-----CATCTTTGCGGGTCAGCTCAAGC---AGGACCTGGCTTGAGTT  
TCACTTTTAAGATGCTTGAATAATGTCAAGTCCCTTTATAATGAGGCTTTTGTGCGTGTGTTGAACCTGCGGCTC-----  
-----ATGCAGGTAGACTCTGCTTTCCCTCCCTTCCCTAAGCCAGAGTCAAGTGTCTGCTCCTGTTTGGCAGCTGTT-GAT  
TGCTTTACC-----TATAGCCGGAGGATTACACTAAGAATGGAGTGTTTTGGGAAAGCAACGCAGACTTACTGAGGCT  
TCTCTCTCTCTCTTGATTCCA

>Tsc

TTACAG---GTAAGGCACCTTACCGGCTCTGGAGAAAGGGGGCAGTAAAGCTGTCCTC--TAGTGCTGGCGATCCACTTG  
TGCTGCGATGATGTGCCCAATCGGCAGGAGAAGGAAGCATCTTGGTGCCTGTGGAGGTACAG-TTCGCTGCGTACAAATA  
AGCGAGTGTGTGCTGAGCCGAACACCTTT-----TG---CCT  
TGTGGCTTGACCTCCTATGTGGCCGCGGGAGCAGA-----CGC  
TACACGCAGTGACAGTACTCGTTGCCG-----CCCTCCTGTCCGTAGGTGCGTGAGAA-----GA  
GCCCAGCTTTATGGCCCTCAGGTTGTGTGCTGAGGC-TTGCCCCAAGAGGTTTGATATTCATGCGACTGCCATGGTGGC  
-----CATCTTTGCGGGTCAGCTCAAGC---AGGACCCAGCTTGAGTT  
TCAGTTTTAAGATGCTTGAATAATATCAGTCCCTTTACAATGAGGCTTTTGTGCGTGTGTTGAACCTGCGGCTC-----  
-----ATGCAGGTAGACTCTGCTTTCCCTCCCTTCCCTAAGCCAGAGTCAAGTGTCTGCTCCTGTTTGGCAGCTGTT-GAT  
TGCTTTACC-----TATAGCCGGAGGATTACACTAAGAATGGAGTGTTTTGGGAGAGCAACGCAGACTTACTGAGGCT  
--TCTCTCTCTCTTGATTCCA

>Gga\_scaffold41614

TTACAG---GTAAGGCACCTTACCGGCTCCGGGGAGAGGGGGCAGTAAAGCTGTCCTC--TAGTGCTGGCGATCCACTTG  
TGCTGCGATGATGTGCCCAATCGGCAGGAGAAGGAAGCATCTTGGTGCCTGTGGAGGTACAG-TTCGCTGCGTACAAATA  
AGCGAGTGTGTGCTGAGCCGGACACCTTT-----TG---CCT  
TGTGGCTTGACCTCCTATGTGGCCGCGGGAGCAGA-----CGC  
TACACGCAGTGACAGTACTCGTTGCCG-----CCCTCCTGTCCGTAGGTGCGTGAGAA-----GA  
GCCCAGCTTTATGGCCCTCAGGTTGTGTGCTGAGGC-TTGCCCCAAGAGGTTTGATATTCATGCGACTGCCATGGTGGC  
-----CATCTTTGCGGGTCAGCTCAAGC---AGGACCCAGCTTGAGTT  
TCAGTTTTAAGATGCTTGAATAATATCAGTCCCTTTACAATGAGGCTTTTGTGCGTGTGTTGAACCTGCGGCTC-----  
-----ATGCAGGTAGACTCTGCTTTCCCTCCCTTCCCTAAGCCAGAGTCAAGTGTCTGCTCCTGTTTGGCAGCTGTT-GAT  
TGCTTTACC-----TATAGCCGGAGGATTGACTAAGAATGGAGTGTTTTGGGAGAGCAACGCAGACTTACTGAGGCT  
--TCTCTCTCTCTTGATTCCA

>Cya

TTACAG---GTAAGGCACCTTACCGGCTCCGGGGAGAGGGGGCAGTAAAGCTGTCCTCCTGTAGTGCTGGGGATCCGCTTG  
CGCTGCGTGTGATGTGCCCACTCGACAGGAGAAGGAAGCGTCTTGGTGTCTGTGAGGTACAG-TCCGCTGCGTACAAATA  
AGCGAGTTGTGTTGGCTGGACACCTTT-----TG---CCT  
TGACGCTTGGCATCCTGTGCGGCCACGGGAGCAGA-----CAC  
TACACGCAGCAGTGGTGTCTGTTGCCG-----CGCTCCTGTCCGTAGGTGCGTACAGAA-----GA  
GCCCTGGCCTTTACGGCCCTCAGGCTCTGTGCCGAGAC-TTGCCCCGAGAGGTTTGATATTCGTGCGACTGCTGCGGTGGC  
-----CATCTTTGCGGGTCAGCTCAAGG---AGGACCTGGCTTAGGTT  
TTGCTTTTAAGATGCTTGAATAATGTCAAGTCCCTTTACAATGAGGCTTTTGGGCGAGCTTTGAACCTGTAGCTC-----  
-----ATGCAGGTAGACTCTGCTGTCTCCCTTCCCTAAGCCAGAGTCAAGTGTCTGCTCCTGTTTGGCAGCTGTT-CAGT  
TGCTTTACC-----TATAGCCGGAGGATTGACTAAGAATGGAGTGTCTGGGAAAGCAGCGCAGACTGACTGAGGCT  
TCTTTCTCTCTCTTGATTCCA

>Asi\_533499093

TTACAG---GTAAGGCACTTACCGGCTCCGGGGAGAGGGGGCGAGTAAAGCTGTCTCTGTAGTGCTGGGGATCCGCTTG  
CGCTGCATGATGTGCCAGTCAACAGGAGAAGGGAAGCATCTTGGTGCCTGCGCAGGTACAG-TCCGCTGCGTACAAATA  
AGCGAGTGTGTGTAGCCGGACGCTTG-----TG---GCT  
TG-----ACGTCCTGTGTGGCCGAGGAGCAGA-----TGC  
TACACGCAGCAACGGTGTCTGTTGCCG-----CCCTCCTGTCTGTAGGTGCGTGAGAA-----GA  
GCCCGGCTTTACGGCCCTCGGGCTCTGTGCCGAGAC-TTGCACCGAGAGGTTTGATATTCGTGCGACTGCTGCGGTGGC  
-----CATCTTTGCTGGTCAGCTCAAGG---AGGACCTGGCTTGGGTT  
TTGCTTTTAAGATGCTTGAATAATGTCAAGTCCCTTTACAATGAGGCTTTTGGGCAAGCTTTGAACCTGCAGCTC-----  
-----ATGCAGGTAGACTCTGTCTCCTCCCTTCCTAAGCC--AGTCAGTTGCTCTGCTCTGTTTGGCAGCTGTTGCT  
TGCTTTACC-----TAGAGCCGAGGATTACACTAAGAATTGAGTGTTTTGGGAAAGCAGCGCAGACTGACTGAGGCT  
TCTCTCTCCCCTCTTGATTCCA  
>Ami\_scaffold-7861  
TTACAG---GTAAGGCACTTACCGGCTCCGGGGAGAGGGGGCGAGTAAAGCTGTCTCTGTAGTGCTGGGGATCCGCTTG  
NGCTGCTGATGTGCCAGTCAACAGGAGAAGGGAAGCATCTTGGTGCCTGCGCAGGTACAG-TCCGCTGCGTACAAATA  
AGCGAGTGTGTGTAGCCGGACACCTTT-----CG---CCT  
TGTGGCTTGACGTCCTGTGTGGCCGAGGNGCAGN-----TGC  
TACACGCAGCAACGGTGTCTGTTGCCN-----CCTTCCTGTCTGTAGGTGCGTGAGAA-----GA  
GCCCGGCTTTACGGCCCTCAGGCTCTGTGCCGAGAC-TTGCACCGAGAGGTTTGATATTCGTGCGACTGCTGC-----  
-----TGTCAGCTCCAGG---AGGACCTGGCTTGGGTT  
TTGCTTTTAAGATGCTTGAATAATGTCAAGTCCCTTTACAGTGAGGCTTTTGGGCAAGCTTTGAACCTGCAGCTC-----  
-----ATGCAGGTAGACTCTGTCTCCTCCCTTCCTAAGCC--AGTCAGTTGCTCTGCTCTGTTTGGCAGCTGTTGCT  
TGCTTTACC-----TATAGCCGAGGATTACACTAAGAATTGAGCGTTTGGGAAAGCAGCGCAGACTGACTGAGGCT  
TCTCTCTCCCCTCTTGATTGCA  
>Gallus\_GB  
TGACAG---GTGAGCAAACCCACGCTTGCA-----GAGCCAGCTGCC-----TGGTGCTG-----CCTTTG  
TGAGGGGAGA-----GCCGGGGCAGAGCCGGGCGTCACTGCCCTTCGGGACTCTGTTTACCTCCTGTGCGGTG  
CTGAGTTCTGTGGTGTGGGGCTCTGTCCAGCCCTGCCCTCAGCAC-----AG---CGC  
TGCGTGCTGCTGACTCACGCATCCACGGGAGCTGAGCTCCTTCTCTGCCAGGCTGCCAGCAAGGATTATTTTCAAGTGT  
TCCATACGGTGGAGAATCTGGTGCAGTTGGACATTTGGAAACGGTTTCTGCATAGGTCACTGAAAAAGCTGGAGTTGA  
ATCCATCCTTCA-----GCCCGGGC-TCATACCAATAAGTGTAAATGC-----AAACTGAGGTTATGGC  
TCCTAAAGCAAAGGGAGAGCAGAGACCCGAGTGTGCCCTTTGTAGCCCCACATACTCAGATGAGCTGTGCCGTGTT  
GTGCCGTGGAGGTGCTCGGACAG-----ATCTGTAGTTCATCCGG  
CTGGAAATGAGGATGATTTGTCTCAGCTCCAGCTTTAGTTC--AGTAAACGATTCCGGGAATTATAGCAGCCTGGT-TTT  
TGCTGTATCCTAATGTTGTGCCCTGGAGAT-----ACCGGGGCCAACACCCTGCCTTTCTG-----  
-----TCCCTCTCCCGCA

**CP08**

>CR1-L3A

-----AGNTTACCAAG  
GGANGTGGTGGANTCTCCATCNCCTGGAGGTCTTTAAANCAAGATTGGATGCTTTTCTAGAAGACANGCTCTGGTTCAAAC  
AGGAATTAATTCGGGGAAGTCCCTGTGGCCTGCGTTA-----  
-----GCAGGGGCTCGGACTAGATGATCTNCNGAGGTCCCTTCCGGCCCTANNATCTATGAA-TCTATGAA-----  
-----

>Exons

-----  
-----  
-----  
-----  
-----

-----TTGCTGATATTCCTG  
GTATAATAAGAGGAGCTCATCAAAACAAAGGCCTAGGGCTGA  
>Cpo\_981\_303300-304850  
TATGAGTTACAAAAGGCTGTACAT-----TACTGCTTCTTTACCCTTATTCTCTGACTTGGGA  
TGT----GCATTATGCATGTCTGGTGAATG-----  
-----ATGTGCCTTTTCAGGGCTGCAAGAAACAAAGCAGCCAAGTTCATGCAGTCT-----GCTCAA  
GT----GCAGGGGCTGGACTCGATGATCTCTCGAGGTCCCTTCCAGCCCTGATGTCTATGAAATCTATAAA-----TGG  
TAGCTGGACAAGTATCTAGACAGATCAGTCACGTACTGTTCTTGTGTTA-AACATCTTCAGTTGCA-----  
-----TTTCTCTTGTAG---TTGCTGATATTCCTG  
GTATAATAAGAGGAGCTCATCAAAACAAAGGCCTAGGGCTGA

>Cno

TATGAGTTACAAAAGGCTGTACAT-----TACTGCTTCTTTACCCTTATTCTCTGACTTGGGA  
TGT----GCAGTATGCATGTCTGGTGAATG-----  
-----ATGTGCCTTTTCAGGGCTGCAAGAAACAAAGCAGCCAAGTTCATGCAGTCT-----GCTCAA  
GT----GCAGGGGCTGGACTCGATGATCTCTCGAGGTCCCTTCCAGCCCTGATGTCTATGAAATCTATAAA-----TGG  
TAGCTGGACAAGTATCTAGACAGATCAGTCACGTACTGTTCTTGTGTTA-AACATCTTCAGTTGCA-----  
-----TTTCTCTTGTAG---TTGCTGATATTCCTG  
GTATAATAAGAGGAGCTCATCAAAACAAAGGCCTAGGGCTGA

>Ote

TATGAGTTACAAAAGGCTGTACAT-----TACTGCTTCTTTACCCTTATTCTCTGACTTGGGA  
TGT----GCAGTATGCATGTCTGGTGAATG-----  
-----ATGTGCCTTTTCAGGGCTGCAAGAAACAAAGCAGCCAAGTTCATGCAGTCT-----GCTCAA  
GT----GCAGGGGCTGGACTCGATGATCTCTCGAGGTCCCTTCCAGCCCTGATGTCTATGAAATCTATGAA-----TGG  
TAGCTGGACAAGTATTTAGACAGATCAGTCACGTACTGTTCTTGTGTTA-AACATGTTTCAGTTGCA-----







>Exons

TCTGGAGGACATTCGGGAGGAGCTTGCCATGGTTATACTG-----

>Cpo\_3905\_100600-102150

TCTGGAGGACATTCGGGAGGAGCTTACCATGATTATACTG---GTAGGCATGAATGCCATTTT-----GAGTCCTGCTAG  
GAAACATGATATCTAGCCAGAGGCAAAATCA--TGTTTTCAGAAATCTGAACTTGGTGTCT--GTTCTGAAGTTTACT  
TC--AAATTGCTGAAATCTT--GTTCCGGTTGATCTTTTGTCTGTATCTTATTTAAAAAACCTTGTATTTTGTGAATAAA  
GGTAGACAGCTAATTTTTTTTCTTTGATTT-----ATGCTTCCCTTTTCAATGACAAGAT  
GTATTTAATGAGAGAG-----CTTA---TTTCATAGATTTTCATAGACATCAGGGCTGGAAGGGACCTCCGG  
AG--ATCGAGTCCAGCCCTTGCCCAAAGGGCAGGAAGTCAGCTGGGGTTATAGGATCCCAGCAAGATAAGCATCCAAT  
TTATTCCTGAAGGTGTTCAATGTAGGTGCTTGAACCACCTCCGATGGCAGACTATCCAGACCTTGGGGGCTTGGACAGT  
AAAGAAATCTTCTTATGTCCAGCCTGAAACGGTCTTGCAGGAG-TTTATGGCCGTTTCGACCTAGTCATCCCTTGGGGC  
GCTCTGGTGAACAAACGTTCCCCAGATCCTGGTGGTCACCCCTGATAAACTTATAGGTGGCCATCAGATCACCCCTGTG  
CCTATGCTCTTCCAGGCTAAAGAGTCCCATGTTTCTCAGCCTATCATCGTAAGAT---CTTA---TAT-CAATGCTGCC  
TTAGAAATGCTCTTTGATCTGT---GTTAATCAAAGACCTATCCTCA-----

-----TTTTTTTTT  
TTTTCTGACAA-TTTCCTAATTTAAAGAAAGTACATGCCTGTGTTTTAGTGTAC-TTTCCTCTCCTCAACAA-CCTTCA  
TGTAAGCTCACCATAGACTCAGTTTAGGAAAGAGTTTTTAATTACAAG-GCTCTACTGTCAATTTCTCAGTTAA--  
-----GCTGTATGTGAAAGCCATTTGCTACCACAAACAAGAAAGGGCCCATCTAGTTGTTTGTATATGAAT-ATA----  
-----TGCTGGTTCAGCTCAGGTGAAAGTCTTTGTACCTT-TGTTTTGGCTTCCGCTTTAGTTGCACCTTGTGAA  
AC-TTTAAGATCAGTGCTTCACTGTTATTTGTTGGGTTTTATCATAG

>Cno

-----TACTG---GTAGGCATGAATGCCATTTT-----GAGTCCTGCTAG  
GAAACATGATATCTAGCCAGAGGCAAAATCA--TGTTTTCAGAAATCTGAACTTGGTGTCT--GTTCTGAAGTTTACT  
TC--AAATTGCTGAAATCTT--GTTCCGGTTGATCTTTTGTCTGTATCTTATTTAAAAAACCTTGTATTTTGTGAATAAA  
GGTAGACAGCTAA-TTTTTTTCTTTGATTT-----ATGCTTCCCTTTTCAATGACAAGAT  
GTATTTAATGAGAGAG-----CTTA---TTTCATAGATTTTCATAGACATCAGGGCTGGAAGGGACCTCCGG  
AG--ATCGAGTCCAGCCCTTGCCCAAAGGGCAGGAAGTCAGCTGGGGTTATAGGATCCCAGCAAGATAAGCATCCAAT  
TTATTCCTGAAGGTGTTCAATGTAGGTGCTTGAACCACCTCCGATGGCAGACTATCCAGACCTTGGGGGCTTGGACAGT  
AAAGAAATCTTCTTATGTCCAGCCTGAAACGGTCTTGCAGGAG-TTTATGGCCGTTTCGACCTAGTCATCCCTTGGGGC  
GCTCTGGTGAACAAACGTTCCCCAGATCCTGGTGGTCACCCCTGATAAACTTATAGGTGGCCATCAGATCACCCCTGTG  
CCTATGCTCTTCCAGGCTAAAGAGTCCCATGTTTCTCAGCCTATCATCGTAAGAT---CTTA---TAT-CAATGCTGCC  
TTAGAAATGCTCTTTGATCTGT---GTTAATCAAAGACCTATCCTCA-----

-----TTTTTTTTT  
TTTTCTGANAA-TTTCCTAATTTAAAGAAAGTACATGCCTGTGTTTTAGTGTAC-TTTCCTCTCCTCAACAA-CCTTCA  
TGTAAGCTCACCATAGACTCAGTTTAGGAAAGAGTTTTTAATTACAAG-GCTCTACTGTCAATTTCTCAGTTAA--  
-----GCTGTATGTGAAAGCCATTTGCTACCACAAACAAGAAAGGGCCCATCTAGTTGTTTGTATATGAAT-ATA----  
-----TGCTGGTTCAGCTCAGGTGAAAGTCTTTGTACCTTTTGTGTTGGCTTCCGCTTTAGTTGCACCTTGTGAA  
AC-TTTAAGA-----

>Ote

-----TGATTATACTG---GTAGGCATGAATGCCATTTT-----GAGTCCTGCTAG  
GAAACATGATATCTAGCCAGAGGCAAAATCA--TGTTTTCAGAAATCTGAACTTGGTGTCT--GTTCTGAAGTTTACT  
TC--AAATTGCTGAAATCTT--GTTTGGTTGATCTTTTGTCTGTATCTTATTTAAAAAACCTTGTATTTTGTGAATAAA  
GGTAGACAGCTAATTTTTTTTCTTTGATTT-----ATGCTTCCCTTTTCAATGACAAGAT  
GTACTTAAATGAGAGAG-----CTTA---TTTCATAGATTTTCATAGACATCAGGGCTGGAAGGGACCTCCAG  
AGATCATCGAGTCCAGCCCTTGCCCAAAGGGCAGGAAGTCAGCTGGGGTTATAGGATCCCAGCAAGATAAGCATCCAAT  
TTATTCCTGAAGGTGTTCAAGTGTAGGTGCTTGAACCACCTCCGCTGGCAGACTGTTCCAGACCTTGGGGGCTCGGACAGT  
AAAGAAATCTTCTTATGTCCAGCCTGAAACAGTCTTGCAGGAGTTTTATGGCCATTCGACCTGGTTCATCCCTTGGGGC  
GCTCTGGTGAACAAACGTTCCCCAGATCCTGGTGGTCACCCCTGATAAACTTATAGGTGGCCATCAGATCACCCCTGTG  
CCTACGCTTTTCCAGGCTAAAGAGTCCCATGTTTCTCAGCCTATCATCGTAAGAT---CTTA---TAT-CAATGCTGCC  
TTAGAAATGCTCTTTGATCTGT---GTTAATCAAAGACCTATCCTCA-----

-----TTTTTTTTT  
TTCCCTGACAAATTTCTAATTTAAAGAAAGTACATGCCTGTG-TTATAGTGTAC-TTTCCTCTCCTCAACAA-CCTTCA  
TGTAAGCTCACCATAGACTCAGTTTAGGAAAGAGTTTTAATTACGAGAGCTCTACTGTCAATTTCTCAGTTAA--  
-----GCTGTGTGAAAGCCATTTGCTACCACAAACAAGAAAGGGCCCATCTAGTTGTTTGTATATGAAT-ATA----  
-----TGCTGGTTCAGCTCAGGTGAAAGTCTTTGTACCTT-T-ATTTTGGCTTCCACTTTAGTTGCACCTTGTGAA  
AC-TTTAAGATCAGTGCTCAGTCA-----

>Mca

-----TACTG---GTAGGCATGAATGCCATTTT-----GAGTCCTGCTAG  
GAAACATGATATCTAGCCAGAGGCAAAATCA--TGTTTTCAGAAATCTGAACTTGGTGTCT--GTTCTGAAGTTTACT  
TC--AAATTGCTGAAATCTT--GTTTGGTTGATCTTTTGTCTGTATCTTATTTAAAAAACCTTGTATTTTGTGAATAAA







GTCTTGTAGGCCTTAGATGATTTAGATGGGTGTCAGAACCAAGATGCAATTATGTTCTGACCCAAACTAGTCATATAG  
 GGTAAAGTAAAACATATAAAGTGAATTTTGGCTTTTATACGCTTTTAAATATTATCAACTT---AATAGT---TTCATAG  
 TTTGTAGGGTCGGAAGGACCTGAGCAGATCATCTAGTCCGATCCCCTGCCATGGCAGGAAAGAATACTGGGGTCAAATG  
 ACCCCAGCAAGATGTTTATCATATGTTGTG---AATGGT---GAAGATGTTATCCATGTATTTAATGAAGATGTCGATTTA  
 ACCAGATTTTCTCTGGGTATTTTATTCCCCTGTTCTCAGTCATTTCACTGCGGTCACTAATTGATGCAGTGTGCTTGA  
 CTGAAAGATAGTAATTGAAGTC-TTCATATTCTACAAGGTA--AATGACAACCTAGAGG  
 >Ote  
 -----ACATCATGACTCTG---GTGAGT---TGAGACAGAACTAGCTCCCT-----  
 -ATTTCTTGAGGCCTAGACTGTGTTTTAAGCTG-TTTTATAAAATTTACTGTTCCCA-----ATAGAATGTAGGACTACAA  
 TGCCCTGAAACAGTCGAAATTTTCATTTTAATACTTCTGGTGTGTTGAGAGCTGTACTGCTATAAATTTACATAAAATCTCTGG  
 CAGTCCAAGTCCCAAATCAACAACTAATGTGCTTCTGAGTTCAGTTTAAAACATTTTCAAATGGGACTACTTCCCA  
 TCTGAATCAAGTACATGACGTAA-TTTTTTAAGCATGAAATGTGCTGACATTACTATGTTGGACCTGGTAATACGGCTTT  
 CCACATCACTTCTGTACCTTACAATGATCAGGTAAGTTTTCAGGAGAAAAACATCTTTGATTTAACAATAATGTTT  
 CTGCTCTAGGAGGGTCTCTAACTTAAAGGAAAAATTTTTTGGGTCCTTTCCCCTTTAATGGGGGGGGGGTGGAA  
 GTCTTGTAGGCCTTAGATGATTTAGATGGGTGTCAGAACCAAGATGCAATTATATTCTGACCCAAACAGTCATATAG  
 GGTAAAGTAAAACATATAAATGAATTTTGGCTTTTATACGCTTTTAAATATTATCAACTT---AATAGT---TTCATAG  
 TTTGTAGGGTTGGAAGGACCTGAGCAGATCATCTAGTCCGACCTCTGCCATGGCAGGACCGAATACCCGGGTCAAATG  
 ACCCCAGCAAGATGTTTATCATATGTTGTG---AATGGT---GAAGATGTTATCCATGTATTTAATGAAGATGTCGCTTTA  
 ACCAGATTTTCTCTGGGATCTTTATTCCCCTGTTCTCAGTCATTTCACTGCGGTCACTAACTGATGCAGTGTGCTTGA  
 CTGAACAGAT-----  
 >Mca  
 AGATCTTGCCAGGGACTTGGCAAATGACATCATGACTCTG---GTGAGT---TGAGACAGAACTAGCTCCCT-----  
 -ATTTCTTGAGGCCTAGACTGTGTTTTAAGCTG-TTTTATAAAATTTACTGTTCCCA-----ATAGAATGTAGGACTACAA  
 TGCCATGAAACAGTGTAAATTTTCATTTTAATACTTCTGGTGTGTTGAGAGCTGTACTGCTATAAATTTACATAAAATCTCTGG  
 CAGTCCGAGTCCCAAATCAACAACTAATGTGCTTCTGAGTTCAGTTTAAAACATTTTCAAATGGGACTACTTCCCA  
 TCTGAATCAAGTACCCGACGTAA-TTTTTTAAGCATGAAATGTGCTGACATTACTATGTTGGACCTGGTAATACAGCTTT  
 CCACATCACTTTTGTCACTTACAATGATCAGATTAGTTTTCAGGAGGAAAAACAGTCTTGAATCTAACAGATGATGTTT  
 CTGCTCTAGGATGTGTTCTCTGACATAAATGGAGATTTTT--TGGGTACTTTTCTCCTTTTATTGTGTGTGCTGTTGAA  
 GTCTTGTAGGCCTTAGATGATTTAGATGGGTGTCAGAACCAAGATGCAATTATATTCTGACCCAAACAGTCATATAG  
 GGTAAAGTAAAACATATAAATGAATTTTAGCTTTTATACGCTTTTAAATATTATCAACTT---AATAGT---TTCATAG  
 TTTGTAGGGTTGGAAGGACCTGAGCAGATCATCTAGTCCGACCTCTGCCATGGCAGGACCGAATACCCGGGTCAAATG  
 ACCCCAGCAAGATGTTTATCATATGTTGTG---AATGGT---GAAGATGTTATCCATGTATTTAATGAAGATGTCGATTTA  
 ACCAGATTTTCTCTGGGATATTTATTCCCCTGTTCTCAGTCATTTCACTGCGGTCACTAATTGATGCAGTGTGCTTGA  
 CTGAAAGATAGTAATTGAAGTC-TTCATATTCTACAAGGTA--AATGACNACCTAGAGG  
 >Tsc  
 AGATCTTGCCAGGGACTTGGCAAATGACATCATGACTCTG---GTGAGT---TGAGACAGAACTAGCTCCCTATTTCTG  
 GATTTCTTGAGGCCTAGACTGTGTTTTAAGCTG-TTTTATAAAATTTACTGTTCTCA-----ATAGAATGTAGGACTACTA  
 TGCTGAAACGGTCGTAATTTTCATTTTAATACTTCTGGTGTGTTGAGAGCTGTACTGCTATAAATTTACATAAAATCTCTGG  
 CAGTCCAAGTCCCAAATCAACAACTAATGTGCTTCTGAGTTCAGTTTAAAACATTTTCAAATGGGACTACTTCCCA  
 TCTGAATCAAGTACATGATGCAATTTTTTAAAGCATGAAATGTGCTGACATGACTATGTTGGACCTGGTAATACGGCTTT  
 CCACATCACTTCTGTACCTTACAATGATCAGATTAGTTTTCAGGAGGAAAAACAGTCTTGAATCTAACGGATGATGTTT  
 CTGCTTCAAGATGTGTTCTCTGACATAAATGGGATTTTT--TTGGTACTTTTCTCCTTTTACTGTGTGTCCTTTGAA  
 GTCTTGTCCGCACTTAGATGATTTAGATGGGTGTCAGAACCAAGATGCAATTATATTCTGACCCAAACAGTCATATAG  
 GGTAAAGTAAATACATATAAATGAATTTCTGGCTTTTATACATCTTTTAAATATTATCAACAT-----  
 -----AATGGT---GAAGATGTTATCCATGTATTTAATGAAAAATGTCGATTTA  
 ACCAGATTTTCTCTGGGATATTTATTCCCCTGTTCTCAGTCATTTCACTGCGGTCACTAATTGATGCAGTGTGCTTGA  
 CTGAAAGATAGTAATTGAAGTC-TTCATATTCTACAAGGTA--AATGACAGCCTANAGG  
 >Gga\_scaffold8751  
 AGATCTTGCCAGGGACTTGGCAAATGACATCATGACTCTG---GTGAGT---TGAGACAGAACTAGCTCCCTATTTCTG  
 GATTTCTTGAGGCCTAGACTGTGTTTTAAGCTG-TTTTATAAAATTTACTGTTCCCA-----ATAGAATGTAGGACTACAA  
 TGCCCTGAAACAGTGTAAATTTTCATTTTAATACTTCTGGGTTTGGAGAGCTGTACTGCTATAAATTTACATAAAATCTCTGG  
 CAGTCCAAGTCCCAAATCAACAACTAATGTGCTTCTGAGTTCAGTTTAAAACATTTTCAAATGGGACTACTTCCCA  
 TGTGAATCAAGTACATGATGCAATTTTTTAAAGCATGAAATGTGCTGACATTACTATGTTGGACCTGGTAATACGGCTTT  
 CCACATCACTTCTGTACCTTACAATGATCAGATTAGTTTTCAGGAGGAAAAACAGTCTTGAATCTAACGGATGATGTTT  
 CTGCTTCAAGATGTGTTCTCTGACATAAATGGGATTTTT--TTGGTACTTTTCTCCTTTTACTGTGTGTCCTTTGAA  
 GTCTTGTCCGCACTTAGATGATTTAGATGGGTGTCAGAACCAAGATGCAATTATATTCTGACCCAAACAGTCATATAG  
 GGTAAAGTAAATACATATAAATGAATTTCTGGCTTTTATACATCTTTTAAATATTATCAACAT-----  
 -----AATGGT---GAAGATGTTATCCATGTATTTAATGAAAAATGTCGATTTA  
 ACCAGATTTTCTCTGGGATATTTATTCCCCTGTTCTCAGTCATTTCACTGCGGTCACTAATTGATGCAGTGTGCTTGA  
 CTGAAAGATAGTAATTGAAGTC-TTCATATTCTACAAGGTA--AATGACAGCCTAGAGG  
 >Cya  
 AGATCTTGCCAGGGACTTGGCAAATGACATCATGACTCTG---GTGAGT---TGAGACAGAACTAGCTCCCTATTTCTG  
 GATTTCTTGAGGCCTAGACTGTGTTTTAAGCTG-TTTTATAAAATTTACTGTTCCCA-----ATAGATGTAGGACTACAA  
 TGCCCTGAAACAGTGTAAATTTTCATTTTAATACTTCTGGTGTGTTGAGAACTGTACTGCTATAAATTTGCAATTAATCTCTGG  
 CAGTCCAAGTCCCAAATCAGCAAACTAATGTGCTTCTGAGTTCAGTTTAAAACATTTTCAAATGGGACTACTTCCCA  
 TCTGAATCAAGTACACGATGCAA-TTTTTTAAGCATGAAATGTGCTGACATTACTATGTTGGACCTGGTAATACGGCTTT  
 CCACGTCACCTTCTGTACCTTACAATTTATCAGATTGTTTTCTCTCTGAAAACTAATCTTGAACCTAACAGATGTTGTTT  
 CTGCTCCAGGATGTGTTCTCTGACACACGTGGGGATTTTT--T-GGTACTTTCTCCTTTTATTGTTGTGTCCTTTGAA  
 GTCTTGTCCGCACTTAGATGATTTAGATGGGTGTCAGAACCAAGGTGCAATTATATTCTGACCCAAACAGTCGTTTGA  
 GGTAAAGTAAATACATATAAATGAATCTGGCTTTTATACATCTTTTAAATATTATCAACAT-----  
 -----AATGGT---GAAGAAGTTATCCATGTGTTAATGAAGATGTCAGTTTA  
 ACCAGATTTTCTCTGGGATATTTATTCCCCTGTTCTCAGTCATTTCACTGCGGTCACTAATTGATGCAGTGTGCTTGA  
 CTGAAAGATAGTAATTGAAGTC-TTCATATTCTACAAGGTA--AATGACAGCCTAGAGG  
 >Asi\_53311147  
 AGATCTTGCCAGGGACTTGGCAAATGACATCATGACTCTG---GTGAGT---TGAGACAGAACTAGCTCCCTATTTCTG



ATTTTTGAAATCAGGA--ACAG-AGTCAGCCAAGGCAGACTTTGTAGCCTTTCTACCTTTTGTAGGTTCTTAAACAACCAC  
 ATGGGCATTGTTCCCTTAAGAAAAACTTGGATTGTTTT-----GCAGATTCAGATCCTTCAGTGA  
 AAATTGAAGTCTCACAAGCCTGCTGTAATAAGGAGTTTTATACCTACTATATA-GTGTACAATCTGTACAAGATCAACT  
 TGCCAGATCCACACAGTGAGGCATTGACAAAG--TTTCATAGTTTCATAGTAGCTAGAGTCGGAAGGGACCTAGGTAG  
 ATCATCTAGTCCGACCCCTGCCTTGG-CAGGAAAGAGCACC--GATTTAGTGGGACCCGAATCTTGTCTTCTGTCCC  
 TCAAA-CCAGGATAACTAGGAAAAGCTGATTTAGAAAGAAAACACCGTTGTACATAAAAAGCAACTTGGATCTCTATTTT  
 TAATACAC---CCAGTGTACGCCAG--TTTTTCTTGATCTTTGACTTGAATCACTTTGTCAAGTAACTGAACCTGTTTT  
 TAATTCATCTTCCCTTCAAGCAACACTTCATTTCCGAGGTAGAAAGACCTATAAATG-AC-----  
 ---TGCGGTAAAGCGGTGACTAATGCTTCTCCTTCTGTTGTGGATGTTTCA  
 >Cpa  
 -----TTGTTGGCGTGCTACA----GAA  
 TCTAG--GAGTGTGACTGCTTTCGCGGGGGATGAGGG-----  
 -GGAGGTATTAAATTTGTATGTCACTACTGAGCTCCTTCTAGT--AAAGTGTGACTGCTTCCAAAAATGTCAAAGCT  
 TTAATTTTCATCTTGTTCCTTGAATGCTGGAAGTTAGCTTGAGACGTTTTTCAGAACT-----  
 -----TTACTTTATAGATGAGTGCGAAGTGGAAAGCCTTTTGTGCTTTGAATTGGTAGTGGAAGTGGT  
 ATTTTTGAAATCAGGA--ACAG-AGTCAGCCAAGGCAGACTTTGTAGCCTTTCTGCCTTTTGTAGGTTCTTAAACAACCAC  
 ATGGGCATTGTTCCCTTAAGAAAAACTTGGATTGTTTT-----GCAGATTCAGATCCTTCAGTGA  
 AAATTGAAGTCTCACAAGCCTGCTGTAATAAGGAGTTTTATAGTACTATATA-GTGTACAATCTGTACAAGATCAACT  
 TGCCAGATCCACACAGTGAGGCATTGACAAAG-----  
 -----GATTTAGTAGGACCCGAATCTTGTCTTCTGTCCC  
 TCAAA-CCAGGATAACTAGGAAAAGCTGATTTAGAAAGAAAACACCTTGTACATAAAAAGCAACTTGGATCTCTATTTT  
 TAATACAC---CCAGTGTACGCCAG--TTTTTCTTGATCTTTGACTTGAATCACTTTGTCAAGTAACTGAACCTGTTTT  
 TAATTCATCTTCCCTTCAAGCAACACTTCATTTCCGAGGTAGAAAGACCTATAAATG-AC-----  
 ---TGCGGTAAAGCGGTGACTAATGCTTCTCCTTCTGTTGTGGATGTTTCA  
 >Cmi  
 -----CTCCTTCA-----AGGGTCGGATGGCGTGCTACA----GAA  
 TCTAG--GAGTGTGACTGCTTTCAGGGGGATGAGGG-----  
 -GGAGGTATTGATTTGTATGTCACTACTGAGCTCCTTCTAGT-AAAAGTGTGGCTGCTTGGCAAAAATGTCAAAGCT  
 TTAATTTTCATCTTGTTCCTTGAATGCTGGAAGTTAGCTTGAGACGTTTTTCAGAACT-----  
 -----TTACGGTATAGATGAGTGCAAAGTGGAAAGCCTTTTGGCTGGTTGAAGTGTAGGGGAAACTGCT  
 ATTTTTGAGGTCAGGA--ACAG-ACTCAGCCAAGGCAGACTTTGTAGCCTTTCTACCTTTTGTAGGTTCTTAAACAACCAC  
 ATGGGCATTGTTCCCTTAAGAAAAACTTGGATTGTTTT-----GCAGATTCAGATCCTTCAGGGA  
 AAAGTGAAGTGTACAAGCCTGCTGTAGGAGGGAGTTGTATACCTAGTATATG-GTGTACGAGCTGTACAAGATCAACT  
 TGCACAGATCCACACAGTGAGGCATTGACAAAG-----  
 -----GATTTAGTGGGACCCGAATCTTGTCTTCTGTCCC  
 TCAAA-CCAGGATAACTAGGAAAAGCTGATTTAGAAAGAAAACACCTTGTACATAAAAAGCAACTTGGATCTCTATTTT  
 TAATACAC---CCAGTGTACGCCAG--TTTTTCTTGATCTTTGACTTGAATCACTTTGTCAAGTAACTGAACCTGTTTT  
 TAATTCATCTTCCCTTCAAGCAACACTTCATTTCCGAGGTAGAAAGACCTATAAATG-AC-----  
 ---TGCGGTAAAGCGGTGACTAATGCTTCTCCTTCTGTTGTGGATGTTTCA  
 >Gga\_scaffold15258  
 ACTTGTACG---GTAACTTTTTCTAACAAAAACTCCTTCA-----AGGGTGTATGGCATGCTACA----GCA  
 TCTAGGAGAGTGTGCTGCTTGGCGGGGATGAGGG-----  
 -GGAGGTATTGATTTGTATGTCACTACTGAGCTCCTTCTAGT--AAAGTGTGACTTCTTCCAAAAATGTCAAAGCA  
 TTAATTTTCATCTTGTTCCTTGAATGCTGGAAGTTAGCTTGAGATGTTTTTCAGAACT-----  
 -----TTACTTTATAGATGAGTGCAAAGTGGAAAGCCTTTTGTGCTTTGAATTGATAGTGGAAGTGGT  
 ATTTTTGAAATCAGGAACACAG-AGTCAGCCAAGGCAGACTTTGTAGCCTTTCTACC-TTTGTAGGCTCTTAAACAACCAT  
 ATGGGCATTGTTCCCTTAAGAAAAACTTGGATTGTTTT-----GCAGATTCAGATCCTTCAGTGA  
 AAATTGAAGTCTCACAAGCCTGCTGTAATGAGG--TTTTATACCTCCTATATAGGTGTACAATCTGTACAAGATCAACT  
 TGCCAGATCCTCACAGTGAGGCATCGACAAAG-----  
 -----GATTTAGTAGGACCCGAGTCTTGTCTTCTGTCCC  
 TCAAA-CCAGGATAACTAGGAAAAGCTGATTTAGAAAGAGAACACCCATGTACAAAAAGCAACTTAAATCTCTATTTT  
 TAATACAC---CCAGTGTACGCCAG--TTTTTCTTGATCTTTGACTTGAATCACTTTGTCAAGTAACTGAACCTGTTTT  
 TAATTCATCTTCCCTTCAAGCAACACTTCATTTCCGAGGTAGAAAGACCTATAAATG-AC-----  
 ---TGCGGTAAAGCGGTGACTAATACTTCTCCTTCTGTTGTGGACGTTTCA  
 >Asi\_533334148  
 ACTTGTACG---GTAACTTTTTCTAACGAAAAACTCCTTCA-----AGGGTCATATGGCGTGCTACA----GCA  
 TCTAGGAGAGTGCCTGCTTGGCGGGGATGAGGG-----  
 -GGAGGTATTGATTTGTATGTCACTACTGAGCTCCTTCTAGT--AAAGTGTGACTGCTTCTAAAAATGTCAAAGCT  
 TTAATTTTCATCTTGTTCCTTGAATGCTGGAAGTTAGCTTGAGACATTTTCAGGACT-----  
 -----TTACTTTATAGATGAGTGCAAAGTGGAAAGCCTTTTGTGCTTTGAATTGATAGTGGAAGTGGT  
 ACTTTTGAATCAGGAACACAG-AGTCAGCCAAGGCAGACTTTATAGCCTTTCTACCC-TTTGAGGCTCTTAAAAACCAT  
 ATGGGCATTGTTTCCCTTAAGAAAGAACTTGGATTGTTTTGCCTTTGCTTTTATAAAGCAGATTTAGATCCTTCAGTGA  
 AAATTGATGCTCACAAGCCTGCTGTAATGAGGCTTTTACCTACTATATAGGTGTACAATCTGTAGAAGATCAGCT  
 TGCCAGATCCACACAGTGAGGCATTGACAAAG-----  
 -----GATTTAG--GACCCGAGTCTTGTCTTCTGTCCC  
 TCAAG-CCAGGATAACTAGGAAAAGCTGATTTAGAAAGAGAACACCCCTTGCACATAAAAAGCAACTTAAAGATCTATTTT  
 TAATGCAC--CCAGTGTACGCCAGTTTTTTTCTTGATCTTTGACTTGAATGCTTTGTCAAGTAACTGAACCTGGTTG  
 TAATTCAGCTGCCCTTCCAAGCAACACTTCGTTTCCAAGTCAAGAAAGACCTATAAATG-AC-----  
 ---CGCAGTAAAGCAGTGTACTAATGCTTCTCCTTCTGTTGTGGACGTTTCA  
 >Ami\_scaffold-663  
 ACTTGTACG---GTAACTTTTTCTAACGAAAAACTCCTTCA-----AGGGTCATATGGCGTGCTACA----GCA  
 TTAGGAGAGTGCCTGCTTGGCGGGATGAGGG-----  
 -GAAGGTATTGATTTGTATGTCACTACTGAGCTCCTTCTAGT--AAAGTGTGACTGCTTCTAAAAATGTCAAAGCT  
 TTAATTTTCATCTTGTTCCTTGAATGCTGGAAGTTAGCTTGAGACATTTTAGGACT-----  
 -----TTACTTTATAGATGAGTGCAAAGTGGAAAGCCTTTTGTGCTTTGAATTGATAGTGGAAGTGGT  
 ACTTTTGAATCAGGAACACAG-AGTCAGCCAAGGCAGACTTTATAGCCTTTCTACC-CITTTGAGGCTCTTAAAAACCAT  
 ATGGGCATTGTTTCCCTTAAGAAAGAACTTGGATTGTTTTGCCTTTGCTTTTATAAAGCAGATTTAGATCCTTCAGTGA  
 AAATTGAAGTCTCACAAGCCTGCTGTAATGAGGCTTTTACCTACTATATAGGTGTACAATCTGTAGAAGATCAACT









**CP19**

>CR1-7B\_Gav

-----TAG-----TTTCATAGTTTTCATAGTTTCTAGGGTCGGAAGGGACCTGAGCAGATCATCTAG  
TCCGACCCCTGCCATGGCAGGAAAGAGTACTGGGGTCAAACGACCCAGCAAGGTGTTTCATCTAACCTCCTCTT-AAAA  
ACCCCCAGGGTAGGAGCCTGCACCACCTCCCTTGGAAAGTTGGTTCCAGACCCTAGCCGCCCTGACCGTAAATAGCGCCT  
CCTGATGTCTAACCTAACCTACCCTCTGCCAGCTTGTGACCGTTGTTCTGGTCACTCCTGGCTGTGCTCGGGGAACA  
GTGACTCCCCAATGCCTGTGTAT--CCCCCTGACCAGTTTGTAAACAGGCCACAAGATCCCCCTCAGCCTTCTCTTT  
TGGAGGCTGAACAGGTTTCAGGTCCTCCTCATAGGGCTGCCCTGCAGTCCCCTGATCATGCGAGTGGCCCT  
CCTCTGGACCTCTCCATGTGTCCACA--TCCCTCTTGAA-----GTGCGCGGCC-----CAGA  
ACTGGACGAGTACTCCAACCTGCGGCCTGACCAGTGCCGCATAGAGGGGGAGGATCACCTCTCTGGACCTGCTCGAGATG  
CATCTGTGGATGCATGACAAGGTACG-----

>Exons

-----GTTGATGAAATCATGATGACTCTAAAAACAGG

>Cpo\_9705\_38350-39900

CGACATAAATGAAGAGCAATCTGTACCTTGTGAGAGGTTTCTTTGGCTTAGTG--TTTTCAATTCCCATTGCCCTG  
GAACTGCACCCAGAA--TGTAAT--TGTCATAGTTTTCATAGTTTCTAGGGTCAGAAGGGACCTGAGTAGATCATCTAG  
CCCGACCCCTGCCGTGGCAGGAAATAATACTGGGGTCAAACAACCCAGCAAGATGTTTCATCCAACCTCCTCTT-AAAA  
ACCCCCAGGGTAGGAGCCAGCACCCTTCTCTTGGAAAGTTGGTTCCAGACTCTAGCCGCCCTGTG--TGAAGTAGCGCTT  
CCTGATATCTAGCCTAACATGCCTCTGCCAGCTTGTGACCGTTATTCTGGTCACTCCTGGCAGTGCATGGGGGAATA  
GTGACTCCCCAATGCCTGTGTAT--CCTCCCCGAGTAGTTTATAACAGGCCACTAGATCCCCCTCAGCCTTCTCTTG  
TGGAGGCTGAACATGTTTCAGGTCCTCCTCTCGTAGGGTCTACCCTGTGCCCCCTGATCATGTAAGTGGCCCT  
CCTCTGGACCTCTCGATGTGTCCACAAGATTGCAGTGAATGTAA--TGTA--TGTCCTTAAGATTGTAATGTAA  
AAAAAAA--GTTAATATTTGTTTAAAGGCAGAAATAAGAATATTAACAACAATGTAATCATTTCCCTTGATATTTGGGT  
GACCATGGAACCTTCATGTCTTAAACAAG--TATTGAATCAGATTATATGCAATAGAATTCCCATCAAAATGAATGGGG  
AGTCTTAAAACTGACACCAGTGTGTATTTTAAAGTCAAAGCTCCCTGCTTACTAGTAATCGGGTCATGTCTCATTG  
A--CATCCTCTGCTCTGGAGCAT-AAATA-----TTAACCTAAGATGCCATTTCAAAGAAAAAGCACACCAA  
CATAA-CTTAAAC-----ATAAGTTTGTTCAT-----TCACCTTGGTTTCT-GT  
TGTTA-TTCTCTTAG--GTTGATGAAATCATGATGACTCTAAAAACAGG

>Cho

-----AATGAAGAAGCAATCCTTGTACCTTGTGAGAGGTTTCTTTGGCTTAGTG--TTTTCAATTCCCATTGCCCTG  
GAACTGCACCCAGAA--TGTAAT--TGTCATAGTTTTCATAGTTTCTAGGGTCGGAAGGGACCTGAGTAGATCATCTAG  
TCCGACCCCGCCGTGGCAGGAAATAATACTGGGGTCAAACAACCCAGCAAGATGTTTCATCCAACCTCCTCTT-AAAA  
ACCCCCAGGGTAGGAGCCAGCACCCTTCTCTTGGAAAGTTGGTTCCAGACTCTAGCCGCCCTGTG--TGAAGTAGCGCTT  
CCTGATATCTAGCCTAACATGCCTCTGCCAGCTTGTGACCGTTATTCTGGTCACTCCTGGCAGTGCATGGGGGAATA  
GTGACTCCCCTAATGCCTGTGTAT--CCTCCCCGACTAGTTTATAACAGGCCACTAGATCCCCCTCAGCCTTCTCTTG  
TGGAGGCTGAACATGTTTCAGGTCCTCCTCCTCGTAGGGTCTACCCTGTGCCCCCTGATCATGTAAGTGGCCCT  
CCTCTGGACCTCTCGATGTGTCCACAAGATTGCAGTGAATGTAA--TGTA--TGTCCTTAAGATTGTAATGT-A  
AAAAAAA--GTTAATATTTGTTTAAAGGCAGAAATAAGAATATTAACAACAATGTAATCATTTCCCTTGATATTTGGGT  
GACCATGGAACCTTCATGTCTTAAACAAG--TATTGAATCAGATTATATGCAATAGAATTCCCATCAAAATGAATGGGG  
AGTCTTAAAACTGACACCAGTGTGTATTTTAAAGTCAAAGCTCCCTGCTTACTAGTAATCAGGTCAATGTCTCATTG  
A--CATCCTCTGCTCTGGAGCAT-AAATA-----TTAACCTAAGATGCCATTTCAAAGAAAAAGCACACCAA  
CATAA-TTTAAAC-----ATAAGTTTGTTCAT-----TCACCTTGGTTTCT-GT  
TGTTA-TTCTCTTAG--GTTGATGAAATCATGATGACTCTAAAAACAGG

>Ote

CGACATAAATGAAGAGCAATCTNGTACCTTGTGAGAGGTTTCTTTGGCTTAGTGTTTTTCAATTCCCATTGCCCTG  
GAACTGCACCCAGAA--TGTAAT--TGTCATAGTTTTCATAGTTTCTAGGGTCGGAAGGGACCTGAGTAGATCATCTAG  
TCCGACCCCGCCATGGCAGGAAATAATACTGGGGTCAAACAACCCAGCAAGATGTTTCATCCAACCTCCTCTT-AAAA  
ACCCCCAGGGTAGGAGCCAGCACCCTTCTCTTGGAAAGTTGGTTCCAGACCCTAGCCGCCCTGTCCGTGAAGTAGCGCTT  
CCTGATATCTAGCCTAACATGCCTCTGCCAGCTTGTGACCGTTATTCTGGTCACTCCTGGCAGTGCACGGGGGAATA  
GTGACTCCCCAATGCCTGTGTAT--CCCCCTGACCTAGTTTATAACAGGCCACTAGATCCCCCTCAGCCTTCTCTTG  
TGGAGGCTGAACATGTTTCAGGTCCTCCTCCTCATAGGGTCTACCCTGTGCCCCCTGATCATGTAAGTGGCCCT  
CCTCTGGACCTCTCGATGTGTCCACAAGATTGCAG-----TGTA--TGTA--TGTCCTTAAGATTGTAATGT-A  
AAAAAAA--GTTAATGTTTGTTAAAGGCAGAAATAAGAATATTAACAACAATGTAATCATTTCCCTTGATATTTGGGT  
GACCATGGAACCTTCATGTCTTAAACAAG--TATTGAATCAGATTATATGCAATAGAATTCCCATCAAAATGAATGGGG  
AGTCTTAAAACTGACACCAGTGTGTATTTTAAAGTCAAAGCTCCCTGCTTACTAGTAATCAGGTCAATGTCTCATTG  
A--TATCCTCTGCTCTGGAGCAT-AAATA-----TTAACATAAGATGCCATTTCAAAGAAAAAGCACACCAA  
CATAA-CTTGAAC-----ATAAGTTTATTCAT-----TCACCTTGGTTTCT-GT  
TGTTA-TTCTCTTAG--GTTGATGAAATCATGATGACTCTAAAAACAGG

>Mca

-----GTACCTTGTGAGAGGTTTCTTTGGCTTAGTG--TTTTCAATTCCCATTGCCCTG







CCAATTTCCAAGCAAAGTGGTGTGGCTCCTACCTGGGGGGCTTTAAGAGGAGGCTGGATGAACACCTTGCCGGGGTCC  
TTTGACCC-AGTACTCTTTCTGCCATGGCAGGGGGCCGGACTAGATGATCTGCTCAGGTCCCTTCGGACCCGACCAATT

>Mca

GCTGCTCCTGGCAGTAG---CTGTGCAACAGAGGCACCCGCGGATGAAGTGT-----GAGGGGCGAGGGTGC  
GACTC-----CGAGATGGGCACA  
GCCCTCGTGGAGACTGCGCGGCCGT-----GCGAGTCT--GGGCAGGGAGCCAGGGTCTGCCGTGTC  
AACCTTGGCTCTGACATGGGG-----CTCAGCTCCCTTACGGGGCTACTGCCACCCGAGCTTTGCTGCCGGAGTCCCCTA  
GTTTCAAGCAGCAGGCGCCAGAAACCTCCTTTGTGAGCCAGAAAGGGCTTTTACCAGTGTTCAGCAAAGGATGTGCTA  
TTTCCACC-----CCTGCCGATGTGGCAAATAGCATAAGGGA-----  
-----GATAA-----ATGC-----AACCAGGACTGCCAGGAGTGACCAGGAA-TAG---C  
CGGCACAAGCTGGCAGAGGGTAGATTTAGGCTAGACATCAGGAGATGCTACTTCACGGTCCAGGGCGGCTAGGATCTGGAC  
CCAATTTCCAAGCAAAGTGGTGTGGCTCCTACCTGGGGGGCTTACATCAGGGCTTGTCTCTCCACTGATTACCTCTAT  
TCTAGGT--AGTCTTTGGTTAGCCTGCAAGGTACAAAAGTACCCTGCCCTGCATTCTAGTAGT-----  
-----AATTAC-----TTTTATGTGGATATACAGAGATAGTTTA-AAGCAGCTAGCATGTGTACTGCTAG  
CACTGCGC-----CCTCATCAGCACAGAACTCAGCATAGACTTACTGGCCATGTATTT  
ATTCAGCTTCCCAGCAACTTCTGCAGCCGGCAGTGAACCTCCTTGATGCAGCAGCTACACAGCC

>Tsc

GCTGCTTCTGGCAGTAG---CTGTGCAACAGAGGCACCCACAGGATGAAGTGT-----GAGGGGTGAGGGTGC  
GACTC-----CGAGATGGGCACA  
GCCCCCTGGAGACTGCGCGGCAGT-----GCGAGTCT--GGGCAGGGAGCCAGGGTCTGCCGTGTC  
AACCTTGGCTCTGACATGGGG-----CTCGGCTCCCTTATGGGGCTACTGCCACCCGAGCTTTGCTGCCAGAGTCCCCTA  
GTTTCAAGCAGCAGGACCAGAAACCTCCTTTGCCAGCCAGAAAGGGCTTTTACCAGTGTTCAGCAAAGGATGTGCTA  
TTTCCACC-----CCTGCCGATGTGGCAAATAGCATAAGGGA-----  
-----GATAAGCCACTGCCATGC-----AACCAGGACTGCCAGGAGTGACCAGGAA-TAA----

-----TGGACTTGATGATCTGCTCAGGTCCCTCT-GACCCGACCAACT  
ATGAAACTATATGAAACCTAG---CCCTTGAGAGGCAGGGCAAGGGAGACCGCA-ATGCATAGATGTCACGCTCCGGCCA  
CACTAGCCAGGGGCCAGGGCACTAGATCAGCCATAACTGACCAGAGCTAGAGCTGGCATGG-----  
-CTCAGACCCACGGTGGCCAGGGCTGGGAGGAGGGAGACGGCAGTGAACCCGGTGGGAACT

>Gga\_scaffold21810

GCTGCTTCTGGCAGTAG---CTGTGCAACAGAGGCACCCACAGGATGAAGTGT-----GAGGGGTGAGGGTGC  
GACTC-----CGAGATGGGCACA  
GCCCCCTGGAGCCTGCGCGGCAGT-----GCGAGTCT--GGGCAGGGAGCCAGGGTCTGCCGTGTC  
AACCTTGGCTCTGACTTGGGG-----CTCGGCTCCCTTATGGGGCTACTGCCACCCGAGCTTTGCTGCCAGAGTCCCCTA  
GTTTCAAGCAGCAGGACCAGAAACCTCCTTTGTGAGCCAGAAAGGGCTTTTACCAGTGTTCAGCAAAGGATGTGCTA  
TTTCCACC-----CCTGCTGATGTGGCAAATAGCATAAGGGA-----  
-----GATAAGCCACTGCCATGC-----AACCAGGACTGCCAGGAGTGACCAGGAA-TAA----

-----TGGACTTGATGATCTGCTCAGGTCCCTCT-GACCCGACCAACT  
ATGAAACTATATGAAACCTAG---CCCTTGAGAGGCAGGGCAAGGAAGACAGCA-ATGCACAGATGTCACGCTCCGGCCA  
CACTAGCCAGGGGCCAGGGCACTAGATCAGCCATAACTGACCAGAGCTAGAGCTGGCATGG-----  
-CTCAGACCCACGGTGGCCAGGGCTGGGAGGAGGGAGACAGCAGTGAACCTGGCGGAACT

>Cya

GCTGCTCCTGGCAGTGG---CTGTGCAACAGAGGCACCCACAGGATGAAGTCT-----GAGGGGTGAGGGCGC  
GACTC-----CGGGATGGGCACA  
GCCCTCGTGGAGACCGCAGGGCAATCAGAGAGCGGGGCGGGTGAAGTCT--GGGCAGGGAGCCAGGGTCTGCCAGGTC  
AAC-----CTTGGCTCCCTTATGGGGCTACTGCCACCCGAGCTTTGCTGCCAGGGTCCCCTA  
GTGCCAAGCAGCAGGACCAGAAACCTCCTTTGTGATCCAGAAAGGGGTTTACCAGTGTTCAGCAAAGGATGTACTG  
TTTCCACCTTACCACCCCTGACCTACCGATGCTGGCAAATAGCATAGGGGA-----  
-----GATAAGCCACTGCCATGC-----

-----AACCTAG---CCCTTGAGAGGCAGGGCAAGGATGACAGCA-ATGCATAGATGTCATGCGCTGGCCA  
CACTATCCAGGGGCCCGGACCTAGATCGGCCATCACTGACCAGAGCCAGAGCTGGCATGG-----  
-CTCGGACCCACTGTGCCAGTGGCGGAGGAGGAGACAGCGATTGAACCTGGTGGGAACT

>Asi\_533486932

GCTGCTCCTGGCAGTAG---CTGTGCAACAGAGGCACCCACAGGATGAAGTCT-----GAGGGGTGAGGGCGT  
GACTC-----CGAGGTGGGCACA  
GCCCTCATGGAGACCGCAGGGCAATCAGAGAGCGGGGCACTGTGAGTCT--GGGCAGGGAGCCAGGGTCTGCCATGTC  
AACCTTGGCAGGACCTGACATGGGGCTCAGCCCTTATGGGGCTACTGCCACCCGAGCTTTGCTGCCAGAGGTCCTTA  
GTGCCAAGCAGCAGGACCAGAAACCTCCTTTGTGAGCCAGAAAGGGGTTTATCAGTGTTCAGCAAAGGATGTACTG  
TTTCCACCCCTGCCACACTGACCTACCGATGCTGGCAAATAGCATAGGGGA-----  
-----GATAAGCCACTGCCATGC-----AACCTAGCCCTTGAGAGGCAGGGCAAGGAT-GAC----

-----AGCA-ATGCATAGATGTCATGCTCTGGCCA  
CGCTATCCATGGGCCAGGAACTAGATCAGCCATGACTGACCAGAGCCAGAGCTGGCATGG-----  
-CTCGGACCCACCGTGGCCAGTGTGGCAGGAGGAGACAGCAGTGAATCTGGTGGGAACT

>Ami\_scaffold-11218

GCTGCTCCTGGCAGTAG---CTGTGCAACAGAGGCACCCACAGGATGAAGTCT-----GAGGGGTGAGGGCGC  
GACTC-----CGAGATGGGCACA













```

ACTGTTGCTATTCAAGTTTCCTGATTAAGTGTCTAATFCCCAGTGTTACATCTGAGAGAATGTGAACATCACATAC---
CTTCCACACA
>Ote
TGTTAATGACAACACCACGGGCAGTGC---CTGGAGGAGAGAGA-----CAAGCTGCAAT
ACAGTAC-TGCTGAGGCCAGACTCAAGAGAACTTTCAGCT---CCAGCAGGCTGGAAGAAGCCATTCCAA-----
-----GTCTCTATATGGGTGTTTGTACTGAGGAGTGAGAAGTGTGAGGCCATCAGACCACAATGCCCTTTGTTGTCCT
ATCTACATCAAGGGC-----TCTACCTATGGATTGCTAACC-----TGTACTTTAGTGTGAGGGTGCCTTAGGATCT
GGAATCAACTTCCAAGAGAAGTGGTGC-AGCTCTTACCCTGGGG-----ATCTTTAAGAAGAGACTAGATG
AACACCTTGCTGGGGTGTGTTGACCTCCGACTCTTTCCTCCCATGGCAGGGGGTGGACTTGGTGATCTGCTCACGTCC
CTTCTCACCTACCAATTACGAAACTATAACC---CAGCCCCAGTGAAGGGATTTCTACAGGGGTAGGGCCGCTATCAC
CTGGGATCCCATTTTTCCCGTTTAAAA-----AGAAAAATGACTTCTATAAGTAGGAGTTCAGATACCAG-----A
CACTTTCTGACAGCATCATATCTGCTCGTGGCTTTCTTTAATCC-AAATTAAGGAACAGA-----A
GTACAGCCTTTAGGAGAAATA-AGAAAAATACCAAAGCAGCTTTAAACTTTCCCTACTAAATTACTGCATAGTAT--GAC
TTTTTACTAGATACAGCCT-TTCTAGGAGCTAATATCTATTTCATGTTTGGGTGTGGAGCAGAGAACCACATATATGTTT
ACTGTTGCTATTCAAGTTTCCTGATTAAGTGTCTAATFCCCAGTGTTACATCTGAGAGAATGTGAACATCACATAC---
CTTCCACACA
>Mca
-----GAGAGAGA-----CAAGCTGCAAT
ACAGTACTTGCTGAGGCCAGACTCAAGAGAACTTTCAGCT---CCAGCAGGCTGGAAGAAGCCATTCCAA-----
-----GTCTCTATATGGATGTTGGACTGAGGAGTGAGAAGTGTGAGGCCATCAGACCACAATGCCCTTTGTTGTCCT
ATCTACATCAAGGGC-----TCTACCTATGGATTGCTAACC-----TGTACTTTAGTGTGAGGGTGCCTTAGGATCT
GGAATCAACTTCCAAGAGAAGTGGTGCCTTACCCTGGGG-----GTCTTTAAGAAGAGACTAGATG
AACACCTTGCTGGGGTGTGTTGACCTCCATACTTTCCTCCCATGGCAGGGGGTGGACTTGGTGATCTGCTCACGTCC
CTTCTGACCTACCAATTACGAAACTATAACC---CAGCCCCAGTGAAGGGATTTCTACAGGGGTAGGGCCGCTATCAC
CAGGGATCCCATTTTTCCCGTTTAAAA-----AGAAAAATGACTTCTATAAGTAGGAGTTCAGATACCAG-----A
CACTTTCTGACAGCATCATATCTGCTCGTGGCTTTCTTTAATCC-AAATTAAGGAACAGA-----A
GTACAGTGTTTAGGAGAAATA-AGAAAGATACCAAAGCAGCTTTAAACTTTCCCTACTAAATTACTGCATAGTAT--GAC
TTTTTACTAGATACAGCCT-TTCTAGGAGCTAATATCTATTTCATGTTTGGGTGTGGAGCAGAGAACCACATACATGTTT
ACTGTTGCTATTCAAGTTTCCTGATTAAGTGTCTAATFCCCAGTGTTACATCTGAGAGAA-----
-----
>Tsc
TGTTAATGACAACACCACGGGCAGTGC---CTGGAGGAGAGAGA-----CAAGCTGCAAT
ACAGTACTTGCTGAGGCCAGACTCAAGAGAACTTTCAGCT---CCAGCAGGCTGGAAGAAGCCATTCCAA-----
-----GTCTCTGTATGGGTGTTTGTACTGTGGAGTGAGAAGTGTGAGGCCATCAGACCACAATGCCCTTTTGTCCCT
ATCCACATCAAGGGC-----TCTACCTATGGATTGCTAACC-----TGTACTTCAGTATCAGGGTGCCTTAGGATCT
GGAATCAACTTCCAAGAGAAGTGGTGCCTTACCCTGGGG-----GTCTTTAAGAAGAGACTAGATG
AACACCTTGCCGGGGCTGTTGACCTCCATACTTTCCTCCCACGGCAGGGGGTTCGGACTTGTATGATCTGCTCACGTCC
CTTATGACCTTACCAACTACGAAACTATAACC---CAGCCCCAGTGAAGGGATTTCTACAGGGGTAGGGTGCCTATCAC
CAGGGATCCCATTTTTCCCGTTTAAAA-----AGAAAAATGACTTCCATAAGTAGGACTTCAGATCCCAG-----A
CACTTTCTGACAGCCACGAGCAGATATGATGCTTTCTTTAATCC-AAATTAAGGAACAGA-----A
GTACATCATTTAGGAGAAATA-AGAAAGATACCAAGCAGCTTTAAACTTTCCCTACTAAATTACTGCATAGTAT--GAC
TTTTTACTAGATACAGCCT-TTCTAGGAGCTAATATCTATTTCATGTTTGGGTGTGGAGCAGAGAACCACATACATGTTT
ACTGTTGCTATTCAAGTTTCCTGATTAAGTGTCTAATFCCCAGTGTTACATTTGAGAGAATGTGAACATCACATAC---
CTTCCACACA
>Gga_scaffold14435
TGTTAATGACAACACCACGGGCAGTGC---CTGGAGGAGAGAGA-----CAAGCTGCAAT
ACAGTACTTGCTGAGGCCAGACTCAAGAGAACTTTCAGCT---CCAGCAGGCTGGAAGAATCCATTCCAA-----
-----GTCTCTGTATGGGTGTTTGTACTGTGGAGTGAGAAGTGTGAGGCCATCAGACCACAATGCCCTTTTGTCCCT
ATCCACATCAAGGGC-----TCTACCTATGGATTGCTAACC-----TGTACTTCAGTGTGAGGGTGCCTTAGGATCT
GGAATCAACTTCCAAGAGAAGTGGTGCCTTACCCTGGGG-----GTCTTTAAGAAGAGACTAGATG
AACACCTTGCCGGGGTGTGTTGACCTCCATACTTTCCTCCCACGGCAGGGGGTTCGGACTTGTATGATCTGCTCACGTCC
CTTATGACCTTACCAACTACGAAACTATAACC---CAGCCCCAGTGAAGGGATTTCTACAGGGGTAGGGTGCCTATCAC
CAGGGATCCCATTTTTCCCGTTTAAAA-----AGAAAAATGACTTCCATAAGTAGGACTTCAGATCCCAG-----A
CACTTTCTGACAGCCACGAGCAGATATGATGCTTTCTTTAATCC-AAATTAAGGAACAGA-----A
GTACATCATTTAGGAGAAATA-AGAAAGATACCAAGCAGCTTTAAACTTTCCCTACTAAATTACTGCATAGTAT--GAC
TTTTTACTAGATACAGCCT-TTCTAGGAGCTAATATCTATTTCATGTTTGGGTGTGGAGCAGAGAACCACATACATGTTT
ACTGTTGCTATTCAAGTTTCCTGATTAAGTGTCTAATFCCCAGTGTTACATTTGAGAGAATGTGAACATCACATAC---
CTTCCACACA
>Cya
TGTTAATGACAACACCACGGGCAGTGC---CTGGAGGAGAGAGA-----CAAGCTGCAAT
ACAGTACTTGCTGAGGCCAGACTCAAGAGAACTTCCAGCT---CCAGCAGG-----
-----CTGTGTGTGTGTTTGTACTGTGGAGTGAGAAGTGTGAGGCTGTGAGACCACAATGCCCTTTTGTCCCT
GTCCACATCAAGGGC-----TCTGCCTATGGATTGCTAACC-----
-----
-----CAGCCCCAGTGA-----AGGGATAGGGTTCCTACCAC
CAGGGATCCATTTTTCCCGTTTAAAA-----AGAAAAATGACTTCCATAAGTAGGACTTCAGATCCCAG-----A
CACTTTCTGACAGCCATCAACAGATAGGATGCTTTCTTTTCAATTCGAAATTAAGAGAACAGA-----A
GTACAGCATTTAGAAGAAACA-AGAAAGATACCAAAGCAGCTTTAAACTTTCCCTACTAAATTACTGTGTAGTAT--GA-
TTTTTACTAGATACAGCCT-TTCTAGGAGCTAATATCTATTTCATGTTTGGGTGTGGAGCAGAGAACCACATACATGTTT
ACTGTCGCTATTCAAGTTTCCTGATTAAGTGTCTAACCCTCAGTGTGCACACTTGAGAAACGGTGAACATCACATAC---
CTTCCACACA
>Asi_533262059
TGTTAATGACAACACCACGGGCAGTGC---CTGGAGGAGAGAGA-----CAAGCTGCAAT
ACAGTACTTGCTGAGGCCAGACTC---AGAACTTTTCAGCT---CCAGCAGGCTGGAAGGAGCCGTTCCAA-----
-----GCCTCTGTATGTGTGTTTGTACTGTGGAGTGAGAAGTGTGAGGCTATCAGACCACAATGCCCTTTTGTCCCT
GTCCACATCAAGGGC-----TCTGCCTATGGATTGCTAACC-----
-----
-----

```





```

-----CTTGACTAGGAAAAACAGACAGAGACCACAAG-----TGCTGATACTGC
TAACCTCCATTAAATGTTCTGCGATAAAGAATCCTGCATGCCTTGTGTTTGTCTTGATATATTACCCTGTGCATGGAT---
-----GTTAAGTTTAT--TTTTCTCTGTGAGAAACCAGAAATTGATAAATTTCTATAAGCACA
ACATTTCACTCTTCTTTAAGCCGTGATGCTGCGTGTGTGTTACACCAGTGATTTACTGTCCAAGGTCGTAATTTTAA
TCTCTCTGTCTTAAGTATAAATATGCTTGTAAACGTATACAGTTCGAGGATTCCTTTGAAACAGACAAGTGGGCCATTCC
CCTTGCTG-----TATGGCATTCTCCCTGTGATCAC-AGTATAGCTCTAAATA---AAGAAAAGCTGG
CTCTGT-----CAGTTCTGATCAACCACAACGCGAAGTTTGATTTCTCCACA---GTTA--
-GGTTAGGTTCCCTGTGGTTATTGCTG-GCTGTTCTGATGGCAGC-----AATTTTAATTGATTGATTGG--
-----CTTAAGCCTAAACAATA
TCATCTAGCACT-----GTTTTAACACTGTACAATAAA-----
-----AGCATTAAAGACTTAAAGACAACATAC---CTAGCT
>Ote
CTTCTGTTTCTCCCCCTGGCCCACTGCAGAAGGCAAGCCATCTGTATCAAACC--CTGAAGGATTAAGTCAAACAGGA
AGAAAAATCCTTATCTGTTTATACTGTAGCACAAAATAACTAGTATACCTGGACAACAGCTG-----CACTGTATTTTT
GGTAATATCTTAAATCTAGCTGGATGTCAATG----GTGCCAAAACAAGCTTGCTGTCAGCTTGCTGTCAGTGTAAT
AAGTTTTACCAACCATGT-----
AACAAACATTGC-TTATCTGTAACGAATT-----
-----AACTGTGATTTTTATGCTCTA-----TAATAAAGAAAGATCCCT
TGACAAATTTGACTGTGC-----ATTT--GTTG--TGTGGTAGTAGATTGGTCCGGCTTCTGGCCTG----
-----CTTGACTAGGAAAAACAGCAGAGACCACAAG-----TGCTGATACTGC
TAACCTCCGTTAAATGTTCTGCGATAAAGAATCCTGCATGCCTTGTGTTTGTCTTGATATATTACCCTGTGCATGGAT---
-----GTTAAGTTTAT--TTTTCTCTGTGAGAAACCAGAAATTGATAAATTTCTATAAGCACA
ACATTTCACTCTTCTTTAAGCCGTGATGCTGCGTGTGTGTTACACCAGTGATTTACTGTCCAAGGTTGTAATTTTAA
--TCTCTGTCTTAAGTATAAATATGCTTGTAAACGTATAGAGTTCGAGGATTCCTTTGAAACAGACAAGTGTGATTCC
CCTTGCTG-----TATGGCATTCTCCCTGT-GATCACAGTATAGCTCTAAATAAAGCAAGAAAAGCAGG
CTCTGT-----CAGTTCTGATCAACCACAACGCGAAGTTTGATTTCTCCACA---GTTG--
-GGTTAGGTTCCCTGTGGTTATTGCTG-GCTGGTCTGATGGTAGC-----AATTTTAATTGATTGATTGG--
-----TTAAGCCT-AACAATA
TCATCTAGCACT-----GTTTTAACATTGTACAATAAA-----
-----AGCATTAAAGACTTAAAGACAACATAC---CTAGCT
>Mca
CTTCTGTTTCTCCCCCTGGCCCACTGCAGAAGGCAAGCCATCTGTATCAAACC--CTGAAGGATTAAGTCAAACAGGA
AGAAAAATCCTTATCTGTTTATACTGTAGCAC-AAATAACTAGTATACCTGGACAACAGCTG-----CACTGTATTTTT
GGTAATATCTTAAATCTAGCTGGATGTCAATG----GTGTCAAAAACA-----AGCTTGCTGTCAGTGTAAT
AAGTTCTACCAACCATGT-----
AACAAACATTGC-TTATCTGTAACGAATT-----
-----AACTGTGATTTTTATGCTCTA-----TAATAAAGAAAGATCCCT
TGACAAATTTGACTGTGC-----ATTT--GTTG--TGTGGTAGTAGATTGGTCCGGCTTCTGGCCTG----
-----CTTGACTAGGAAAAACAGACAGAGACCACAAG-----TGCTGATACTGC
TAACCTCCATTAAATGTTCTGCGATAAAGAATCCTGCATGCCTTGTGTTTGTCTTGATATATTACCCTGTGCATGGAT---
-----GTTAAGTTTAT--TTT--TCTAAGAAACCAGAAATTGATAAATTTCTATAAGCACA
ACATTTCACTCTTCTTTAAGCCGTGATGCTGCGATGTGTGTTACACCAGTGATTTACTGTCCAAGGTTGTAATTTTAA
--TCTCTGTCTTAAGTATAAATATGCTTGTAAACGTATAGAGTTCGAGGATTCCTTTGAAACAGACAAGTGGGTGATTCC
CCTTGCTG-----TATGGCATTCTCCCTGTGGATCACAGTATAGCTCTAAATA---AAGAAAAGCTGG
CTCTGT-----CAGTTCTGATCAACCACAACGCGAAGTTTGATTTCTCCACA---GTTG--
-GGTTAGGTTCCCTGTGGTTATTGCTG-GCTGTTCTGATGGTAGC-----AATTTTAATGATTGATTGG--
-----CTTAAGCCTAAACAATA
TCATCTAGCACT-----GTTTTAACATTGTACAATAAA-----
-----AGCATTAAAGACTTAAAGACAACATAC---CTAGCT
>Tsc
CTTCCGTTTCTCCCCCTGGCCCACTGCAGAAGGCAAGCCATCTGTATCAAACC--CTGAAGGATTAAGTCAAACAGGA
AGAAAAATCCTTATTTGTTTATACTGTAGCAC-AAATAACTAGTATACCTGGACAACAGCTG-----CACTGTATTTTT
GGTAATATCTTAAATCTAGCTGGATGTCAATG----GTGTCAAAAACA-----AGCTTGCTGTCAGTGTAAT
AAGTTCTACCAACCATGT-----
AACAAACATTGC-TTATCTGTAACGAATC-----
-----AACTGTGATTTTTATGCTCCA-----TAATAAAGAAAGATCCCT
TGACAAGTTTACCCTGTC-----ATTT--GTTG--TGTGGTGGTAGATTGGTCCAGGCTTCTGGCCTG----
-----CTTGACTAGGAAAAACAGACAGAGACCAGAAG-----TGCTGATACTGC
TTATTTTCAGTTAAATGTTCTGAGATAAAGAATCCTGCATGCCTTGTGTTTGTCTTGATATGTTACCCTGTGCATGGAT---
-----GTTAAGTTTAT--TTTTCTCTCTAAGAAACCAGAAATTGATAAATTTCTATAAGCACA
ATGTTTCACTCTTCTTTAAGCCGTGATGCTGCTGTGTGTGTTAGACCAGTATTTACTGTCCAAGGTCGTAATTTTCTCT
-CTCTCTGTCTTAAGTATAAATATGCTTGTAAACTTATAGAGTTTGAGGATTCCTTTGAAACAGACAAGTGGGTGATTCC
CCTTGCTG-----TATGGAATTCTCTCTGT-GATCACAGTATAGCTTTAAATA---AAGAAAAGCTGG
CTCTGT-----CAGTTCTGATCAACCACAACGCGAAGTTTGATTTCTCCACA---GTTG--
-GGTTAAGTTCCCTGTGGTCATTGCTG-GCTGTTCTGATGGTAGC-----AATTTTAAGTATTGATTGG--
-----CTTAAGCCTAAACAACA
TCATCTAGCACC-----GTTTTAACACTGTACAATGAA-----
-----AGTATTTAAGACTTAAAGACAACATAC---CTAGCT
>Gga_scaffold24882
CTTCCGTTTCTCCCCCTGGCCCACTGCAGAAGGCAAGCCATCTGTATCAAACC--CTGAAGGATTAAGTCAAACAGGA
AGAAAAATCCTTATTTGTTTATACTGTAGCAC-AAATAACTAGTACACCTGGACAACAGCTG-----CACTGTATTTTT
GGTAATATCTTAAATCTAGCTGGATGTCAATG----GTGTCAAAAACA-----AGCTTGCTGTCAGCTAAAT
AAGTTCTAGCAACCATGT-----
AACAAACATTGT-TTATCTGTAACGAATC-----
-----AACTGTGATTTTTATGCTCCA-----TAATAAAGAAAGATCCCT
TGACAAGTTTACCCTGTC-----ATTT--GTTG--TGTGGTAGTAGATTGGTCCAGGCTTCTGGCCTG----
-----CTTGACTAGGAAAAACAGACAGAGACCAGAAG-----TGCTGATACTGC
TTATTTTCAGTTAAATGTTCTGAGATAAAGAATCCTGCATGCCTTGTGTTTGTCTTGATATGTTACCCTGTGCATGGAT---
-----GTTAAGTTTAT--TTTTCTCTCTAAGAAACCAGAAATTGATAAATTTCTATAAGCACA
ATGTTTCACTCTTCTTTAAGCCGTGATGCTGCTGTGTGTGTTAGACCAGTATTTACTGTCCAAGGTCGTAATTTTCTCT
-CTCTCTGTCTTAAGTATAAATATGCTTGTAAACTTATAGAGTTTGAGGATTCCTTTGAAACAGACAAGTGGGTGATTCC
CCTTGCTG-----TATGGAATTCTCTCTGT-GATCACAGTATAGCTTTAAATA---AAGAAAAGCTGG
CTCTGT-----CAGTTCTGATCAACCACAACGCGAAGTTTGATTTCTCCACA---GTTG--
-GGTTAAGTTCCCTGTGGTCATTGCTG-GCTGTTCTGATGGTAGC-----AATTTTAAGTATTGATTGG--
-----CTTAAGCCTAAACAACA
TCATCTAGCACC-----GTTTTAACACTGTACAATGAA-----
-----AGTATTTAAGACTTAAAGACAACATAC---CTAGCT

```







```

-----
AACCTTACATGTGGCAGGAAA-----TAAACAGCTCTTGGCATTCTTAATAGCTCAGCTCTTTCC--TTGTCTGT
GCAG--AAGCTGCGG
>Tsc
GTACCTTAGGAACCTCTCTGGTGTCTGCAGGAGGAACCTAAATGATACAGAATCTCAGACCCAGGATAGGTGTAACATTT
CTCTTGGTGTATGAAAGTAACAGACAGATGATGCAGACCCATAAATGGGGTAACTGCTACTCTGACGG-AGAATCGCCTC
TGAAAGAAGTGGGAAAACCTCTGCAAGTGTATGTTATGCTGATTTAGATTTTGTCTGTTACATCCATCTGGTGGAGGTA
GTTGAAGGAACAAGACTCTTGAGCTGTTCCTGTGCTGCTAAGTGTCAAGAGTAATAGTCACCCACTGTGCACAGGTAC
TTCTGGATAACTGTATGTCTGTCCATTCCCAATCTGAGTGTATTTACATCAGAACAGAACCCCTAGTATCTGTACACCAG
GTATATGTTTCGTCTGTCTAGGACCTGAATTTTAAAGATCTGTATCTACTGACCGAACTGGGGAGA-----GAACAGAG
AACCCACTTTCTTTTTCATAAGATGATGT---AGACATTTATTTTTTTCAGTGGAGGGTAGCGG--GAAGGAGGGTAGA
AGCAGCAGCTGAGGTGAGAGAAGCTTTCAAGCGCCTTCCTT-----
-----
AACCTTACATGTGGCAGGAAA-----TAAACAGCTCTTGGCATTCTTAATAGCTCAGCTC-----
-----
>Gga_scaffold6225
GTACCTTAGGAACCTCTCTGGTGTCTGCAGGAGGAACCTAAATGATACAGAATCTCAGATCCAGGATAGGTGTAACATTT
CTCCTGGTGTATGAAAGTAACAGACAGATGATGCAGACCCATAAATGGGGTAACTGCTACTCTGACGG-AGAATCGCCTC
TGAAAGAAGTGGGAAAACCTCTGCAAGTGTATGTTATGCTGATTTAGATTTTGTCTGTTACATCCATCTGGTGGAGGTA
GTTGAAGGAACAAGACTCTTGAGCTGTTCCTGTGCTTCTAAGTGTCAAGTGTAAATAGTCACCCACTGTGCACAGGTAC
TTCTGGATAACTGTATGTCTGTCCATTCCCAATCTGAGTGTCAATTTACATCAGAACAGAACCATAGTATCTGTACACCAG
GTATATGTTTGTCTGTCTAGGACCTGAATTTTAAAGATCTGTATCTACTGACCGAACTGGGGAGA-----GGACAGAG
AACCCACTTTCTTTTTCATAAGATGATGT---AGACATTTATTTTTTTCAGTGGAGGGTAGCGGGAAGAGGAGGGTAGA
AGCAGCAGCTGAGGTGAGAGAGGCTTTCAAGCGCCTTCCTT---ATTTTCATAGATTCATAGATTAAGGGTCGGAAGGGAC
CTAGTAGATCTTGTAGCCGACCCCGCAGGGCGGGAGAACAACAAAAACCCCAAAAAGAGACGGGACTCAATAG
TCCAGCCAGGTAGGCATCCAGCCTCTTCTTAAAGACCCA---ATTTTCAGTATGTAATTTAATAGAAGA-----TCCCTCC
AACCTTACATGTGGCAGGAAA-----TAAACAGCTCTTGGCATTCTTAATAGCTCAGCTCTTTCC--TTGTCTGT
GCAG--AAACTGCGG
>Asi_533442591
GTACCTTAGAAACCTCTCTGGTGTCTGCAGGAGGAACCCAAATGATAGAGAATCTCAGACCCAGGATAGGTGTAACATTT
CTCCTGGTGTATGAAAGTAAGAGACAGATGATGCAGACCCATAAATGGGGTAACTGCTCCTCTGATGGAAAAATCACCC
TAAAAGAAGTGGGAAAACCTCTGCAAGTGTATGTTATGCTGATTTAGATTTTGTCTGTTACATCCATCTGG---AGGGA
GTTGAAGGAACAAGACTCTTGAGCTGTTCCTGTGCTGCTAAGTGTCAAGAGTAATAGTCACCCACTGTGCACAGGTAC
TTCTGGATAACTGTATGTCTGTCCATTGCTGATCTGAGTGTCAATTTACATCAGAATAGAACCCCTGGTATCTGTACACCAG
GTATATGTTAGTCT---AGGACCTGAATGTTAAGATCTGTATCTACTGACTGGAACCTGGGGAGAGGGGAGGGGACAGAG
AACCCACTTTCTTTTTCATGAGATGATGTAGAGAGACATTTATTTTTTTAGTGGAGGGTAGTGGGAAGAAGGAGGGTAGA
AGAAGCAGCTGAGGTGAGAG--TCTTTCAAGCCCTTCCTT-----
-----
AACCTTACATGTGGCAGGAAA-----TAAACAGCTCTTGGCATTCTTACTAGCTCAGCTCTTTCC--TTGTCTGT
GCAG--AAACTGCGG
>Ami_scaffold-730
GTACCTTAGAAACCTCTCTGGTGTCTGCAGGAGGAACCCAAATGATAGAGAATCTCAGACCCAGGATAGGTGTAACATTT
CTCCTGGTGTATGAAAGTAACAGACAGATGATGCAGACCCATAAATGGGGTAACTGCTCCTCTGATGGAAAAATCACCC
TAAAAGAAGTGGGAAAACCTCTGCAAGTGTATGTTATGCTGATTTAGATTTTGTCTGTTACATCCATCTGG---AGGGA
GTTGAAGGAACAAGACTCTTGAGCTGTTCCTGTGCTGCTAAGTGTCAAGAGTAATAGTCACCCACTGTGCACAGGTAC
TTCTGGATAACTGTATGTCTGTCCATTGCTGATCTGAGTGTCAATTTACATCAGAATAGAACCCCTGGTATCTGTACACCAG
GTATATGTTAGTCTGTCTAGGACCTGAATGTTAAGATCTGTATCTACTGACTGGAACCTGGGGAGAGGGGAGGGGACAGAG
AACCCACTTTCTTTTTCATGAGATGATGTAGAGAGACATTTATTTTTTTAGTGGAGGGTAGTGGGAAGAAGGAGGGTAGA
AGAAGCAGCTGAGGTGAGAGTCTTTCAAGCCCTTCCTT-----
-----
AACCTTACATGTGGCAGGAAA-----TAAACAGCTCTTGGCATTCTTACTAGCTCAGCTCTTTCC--TTGTCTGT
GCAG--AAACTGCGG
>Gallus_GB
GTACGT-----
-----
-----AAGATTCTTG-----GCAGCACTGATCCACACAGTGCCTTGA---
-----GGGCGTCACCCATGTCAGA-----ATCTTTAAAGCAG
-----TCTCCCTCTCACAGCCGAGCAGG-----
-----AAAGAGGAGG---GGGAGTTTACTTTTTGCAGCAAAGGCA-----GGCATGGATTTGA
GGAATCGGGTAATGTGA-----TTTTCAGCGTCTTTCTT-----
-----
-----TCC---ACGTCTGCATGTAACCTCATCAGGGAAGGAGAACCTTT
GTTTTTGGAGCTGTCAAAGAAAAAAACCCAAACAACCTCCTGGCATTCTC-CTCACTCAGCCCTTCCCTTTGTGCTTC
GCAG--AAAATACGG

```

## GG10

```

>CR1-7
-----
GTGTAAGGTGATG-----CAAGGATGGGCGGAGGAGAACAGGATGGGGTTTAAACACAGACAA
GGGAACTCCCTCTTGTGACGACGGAGGTGAAAAGGATCTGGGAGTCAATTTGACTCCAAGATGAACATGAGTCCGGC
AATGTGGGAGGCGGCTAGGAAGGCCAACTGCACCTTGTGCTGATCCACAGATGCATCTCGAGCAGGTCCAAGGAGGTG
ATCCTCCCTCTATGCGGCACCTGGTCAGGCCGACCTGGAGTACTGCGTCCAGTTCTGGGCGCCGACTTTAAGAGGGA
TGTGGACAGCATCGAGAGGGTCCAGAGGAGGGCCACTCGTATGATCAAGGGACAGCAGGGTAGGTCCATGAGGAAAGGT

```













GACAAGAAGATTGCTATTTAGGATTTGCATTTAAAAAAGACACGGGAGACACAAG---GTAATGAGATGCATCAGTCTT  
TGTTAACAGTACGTACCTATCATTGGCTCTATCGCATGTGCAAAAACAGTTGCT-----AAACAATTATTTCAATTG  
TATGAATGGA-AAAGGACAACAATAAATACCTGTTAT--CTGAA-----CTAGTT-----TATTCTGGGTT  
AAATGCCTGAGGCCAAATTTGTT-----TTGTTTTTTATTTAAAGCAGATTTTTAGAAAGCTATGCAGATATGTCTAGAA  
CACGGATAATACAAATGGTGAAGACCCACAAGTACTGTACTTATGTTGACAGAAAACCCACTGAACTGAGTGAAAGCAAAC  
GATCTAA--TATAAAACATGCAGATACTTTCTCTGCCCCACTAGC-----TGGAAACA-----TTTAAACATA  
GCCTACACCTCAGCA-TTAATTTCCATAAGAGGCTTGACCACCTCCATGGCTCTCCAGCTATAGTCAGGATCATCCATG-  
--CCTCCAAGATAAATTT-GGATGTTTTATCTTGTGGGATCCTATGACCCTTGTCTGATTTCTGTGGCCTGGGGCAGGGG  
GCTGGACTCGAT--CTTCTGAGGTCCCTTCCAGCCCTAATGTCTATGAAATTCCTCAA--CCAATTCCTTTTAAATGT  
AAGAGGCATTTCCATTGCATTTAGTGTCTTGTAGAGCCAAGTGGGTGCTTACTGGTATGAACTATCGATAATTTATTC  
TAATACA--TAATCTGAGATTTTAGCATCTGTTG---TGACTCG-GCAGAAGAGTCTGCATGATCAAACAGGCTTTG  
CAATCTGTGACTATCTAGCACAGCTTGGCCTTGTTCACACAACCTAACTAAACTGTGTTCTTGGTACAGTCTAAATATGA  
TGTAACAGTGTTTAAGTGTGCTTACAAATGATCCTTTAAACTCTGTAATGGG--ATTTTTTTGTTTGGACAACCTAG  
AAACTAATGTTGGTG---TTTTTTGTTTGT---GTTTTTTTAACTTTTGAACCACACTTCTCTAACA-TTGTCTTTTT  
GCTGCTA---TGFGGTGATCAATGCAAAACCCGTTCAAAGCTCTAACAGCG-----TACAACCTGA  
AAGTGTGTTGTAGATGCCTTTGTCCAAAATAAACCCAAACATTT-GTAAGGCTCATTAATTGGTTTCATT-----T  
ATTTCC-TTTAG--GGAGTCTTCCAGTATCTACATCAGCAAGTATCTAATGGATGAAGGAGCAAACCTCCATATATATG  
ATCCTAAAGTGCCAAGGGAACAATCATCTGGATCTCTCGCATCCAGGCGTCTCGGAAGATGACC  
>Gallus\_GB\_Chr4\_68877817-68878797  
TTCAGGTAATAGACATGAATGATTATCAGAGGCGCAGATTTGCTTCCCCTATTATTGACAGCCTGTTCAATACTGTCAC  
GATAAGAAGATTGCTATCTTAGGATTTGCATTTCAAAAAGATACTGGGGACACAAG---GTAAGAAAGTGAATTTCAAT-T  
AATTAATATGAGTTCCCTTGTCTACAGCTTGTCTACAGCTACATTTGCTACAGCTGTGCAGCTAAACCCACCAGTTCACTTC  
TGTTAACAAAAACAGGTCAGACATGGGATCCTTTACCTTTTTGAA--TCAATGAT-TCATATTA---TAGTGTCTCTT  
AGATGGGTGAGACAG-----TTGATTTTT---GAGCTCTACA-ACATACATGAAT  
CGTTCAGAAATTA-----ACAGATAACTTGTCTATTTAGT-----  
--CCCTAAGTGAACAGCTGTTTCTTGTGAGTCTTCCAGT-----AATGCTAAGA---CTTTTGA---  
-----GCTGACT-CAAATTGCTATTAGAAGCCAAGGTTCCATCTTTGTTTTCC-----CCAAAGATG-  
-----GCTAATTCTTTTTCTTGT  
AAGAGGCA---GTCTTGATACAATTTCCCAACTACAGTTTGCATGG-----  
-CATGCT--TAGGAGTGTATTTTTGTTACCTAT-----GGTCA-GTAGGAGTA-----CTGG  
GAAGTGGTATTTATCT-----CTTACATGATTCAGC-----ATAAGA  
GATACAAACTGTTTAAA-----ATTACTCTCCTTGGC-----  
-----CTCCCTCAAGACTTTTTATTTT  
GCTGCTGGCATAGATAAATGCTAAGACATTTAATATAAAAACAGTAC-AAAGCTCTGGCACTGAGTATCATGACAATTGA  
AGATTT-----GTATTA-TTAAAGCGTATCAGCTGGTTCTTTAACTGTTTAACT  
CTCTTC-TGTAG--AGAGTCACTCAGCATCTACATTAGCAAGTATTTAATGGATGAAGGAGCAAAGCTCCATATCTATG  
ACCTAAAGTACCGAAGGAACAATCATCTGGATCTGTCCATCCAGGTGTCTCAGAAGATAACC  
>Turkey\_GB\_chr4\_52191232-52192287  
TTCAGGTGATAGACATGAATGATTATCAGAGGCGGAGATTTGCTTCCCCTATTATTGACAGCTTGTTCATACTGTCACC  
GATAAGAAGATTGCTATCTTAGGATTTGCATTTCAAAAAGATACTGGGGACACAAG---GTAAGAAAGTGAATTCGAT-T  
AATTAACATGAGTTCCCT-----GCACTAGATACAGCTGTGCAGCTAAACCCATAAGTTCACTTC  
TATTAACAAAAACAGCTCAGATATGGGATCCTTAACTCATTTGAA--TCAATGAT-TTGTATTA---TAGTGTCTCTT  
AAATGGGTGAGACAG-----TTGATTTCTT---GATCTCTACA-ACATACCTGAAT  
CATTCAGAAATTA-----ACAGATAACTTGTCTATTTAGT-----  
--CCCTA-CTTGAACAAAG-----GTGCTTCTTGTGAGTCTTCCAGT-----AAAGAATGCTAAACTTTTTGCA---  
-----GCTGACT-CAAATTGCTATTAGAAGCCAATAATCCATCTTTGTT-TCC-----CCAAAGATG-  
-----GCTAATTCTTTTTCTTAT  
AAGAGACA---GTCTTGATACAGTTCTCTCAACTACAATTTGCATGA-----  
-CATATT--TAGGAGATGATCCTTGTACCTAT-----GGTCA-GTAGCAGTA-----CTGC  
GACTTGGTACCTATTT-----CTTCCATGATTCAGC-----AAAGA  
GATGCAAACTTTTTAAA-----ATTACTCTCCTTGGC-----  
-----CTCCCTCAAGACTTTTTATTTT  
GCTGCTGGCATAGATTATTGCTAAGACATTTAATGTA AAAACAGTAT-AAAGCTCTGACATTGAGCATTACGACAATTGA  
AGATTT-----GTGTTA-TTAAAACATACCAGTGGTTCTTTAACTGTTTAAAT  
CTCTTC-TGTAG--AGAGTCACTTAGCATCTACATTAGCAAGTATTTAATGGATGAAGGAGCAAAGCTCCATATCTATG  
ACCTAAAGTACCAAAGGAACAATCATCTGGATCTCTCACATCCAGGTGTCTCAGAAGACAACC  
>Taeniopygia\_GB\_chr4\_48120997-48121955  
TTCAGGTAATAGACATGAATGATTATCAGAGAAGAAGATTTGCTTCCCCTATTATTGACAGCTTGTTTAATACTGTCAC  
GACAAGAAGATTGCTATTTAGGTTTGTCTTTCAAAAAGGATACTGGGGACACAAG---GTAAGCAAGCAAGCTCAGT-T  
CACC-GCATGGATTC-TTAC-----AGCTGTCACTGCCACCCAGCTA-----ATGCCAACCACTGAACTGA  
ATTGAT-----GGCTGCATATTGGGACCCTATTTTTGTGACT-GCATTGGGTTGTAACAAGGAT-TAGTCTTTCTT  
AAATGGGTGAG--AA-----GTGATTTCTT-----GACCTCTACA-GCAGACCTGAGT  
CATGCAGAAGTTGC-----AGATGATTCTAGGCTTTATTAAT-----  
--TTGTA---CAAGCAAAGATAGATTTTACAGACTCCTTCCATCTTTCAGAAAAGAAATGCAAACA---CTTTTGA---  
-----GCTGGTTCCAAGTTGCTTTGTGAAACCAAAGCT-----T-----CCTGAAATG-  
-----GTTCAATTCTGA-CCTCACA  
GGAGAACA---ACTTGAACAA--CTCTTCAACTGCAGTTTGTGGGG-----  
--AAAGCTAATAACTCTAGGCCTTTACAATTTT-----GGTCAATTAGGAGTC-----ATCA  
GACTCATATC-TTT-----CTTGGATGATTCAGC-----AAAAGA  
GTTACAGACCTTTTAAAT-----ATTATTCTCCTTGGT-----  
-----GTCCATCAAGATTACACATTT  
CCTGCTGGCAT-GGTTGCCACTAAGATATTTAATGTA AAAAATATATAAAAACCTTGGCATTGCATATCATGATACATGA  
GAACTT-----TCATTACTTGGAAACAAGCAACCTGGTTCTTTAACTGATTGATT  
CCCTTC-CTTAG--AGAGTCACTCAGTATCTACATTAGCAAGTATTTAATGGATGAAGGAGCAAAGCTGCATATCTATG  
ACCTAAAGTACCTAAGGAACAATCATCTTAGATCTCTCACATCTGGGTGTCTCAGAAGATAACC











TTCTTTAG--GAGAATGAGAGACTGAAGCAAGAGATATTTGAGAAGAGCAGTCGAATTGAGGAGCAGAATGAAAAGATC  
 AGTGAGCTGATAGAGCGGAATCAGAG--GTAAGTGAAGGTA-----TACTGTTGTCTGCACCTGCAGGCTTTCT---  
 -ATCTTACATTTGCTTAG-----  
 -----ATGTAAGTGGAGGTTGT  
 CCTATCTCTAGAAT-GGAGAGAAGTTCTGATTTATTTATTTTGTACTAAAATATTGGTATTTTTTAATCCCTT  
 ----CTGTCTTACAGGGCATAATTTCCAAATGAGATCTTACAGTAAACATGAATATGTAAGGAAAGAAAGAA--TCTCA  
 TGCTACTTCTTTGAGTATGCTTCTCTGCT-----TCTGGAGGTTACTTTGCTTTGCTAGCCTTTTAGTAAAGT  
 GGAAGAAATCATAACAGGAAGTGTGTTCTAGTTCAGTGAGTTCAGTGTGTTGTTCCATTAAGTTTACAAAGGGGAAT  
 AACTTAGTCAAGGAAACAGCAGAAACCAGTGG-----TTGCCAGGCTATCAAAATCTTGGCTGTGT  
 GCTAGGAGTCTTAGAATAGTGGCAGAGAGGTAAGCACATATC-----  
 -----TGAAGTGTG  
 TATTCTGTGCTGAAGGCTGGGAACCCCAT-----TCCACCCTGT-----GGAGGCACTTCTTAGTGCAGGACACGAT  
 ACAGAAATGTCTGGGACTTCTCAGTAATGAAAGCTGATTTGAAATCCTTTGCTATCTCATCACTTCTTGTCTCCATTTTT  
 GTATTTATATAAATGCATGTGCCGTCTTCCCCTGTTTACAG--ATATGTGCAACAAAGTAACTTGTAAATGGAGCAGAG  
 GAACCACTCACTCAAAACAACAAACGAAAACACACAGGCAAGAGTGTTCATGCAGAACAGGAGAAG---GTA  
 >Turkey\_GB\_chr19:1361275-1362174\_RC  
 TTCTTTAG--GAGAACGAGAGACTGAAGCAGGAGATATTTGAGAAGAGCAGTCGAATTGAGGAGCAGAATGAAAAGATC  
 AGTGAGCTGATAGAGCGGAATCAGAG--GTAAGGAGTGAAG-----GTGTCTGCAGCTGCAAGAGTTTCTATC---  
 -TTACATTTGCTTAGATG-----  
 -----TAACTAGGAGGTGTCC  
 TATCTCTAGAATGGAGAGAAGTTGTAATTTATTTACTTGGTTTTGGTACTAAAATATTGGTGTTTTTTAATCCCTT  
 TCTGTCT---TTGCAGGGCATAATCTCCAAATGAGATCTTACAGTAAACATGAATATGTAAGGAAAGAAAGAA--TCTCC  
 TGCCACTTCTTTGAGCATACTTCTCTGCT-----TCTGGGGTTATTTGCTTTGCTAGCCTTTTAGTAAAGT  
 GGATGAAATTTGACAGGAAGTAGTGTCTTG--TTCCAGTGAGTTCAGTGTGCGTTCCATTAATTTATGAAGGGGAAT  
 AACTTATCAAGGAAAAGCAGAAAGCAGTGG-----TTACCAGGCTATCAAAATCTCGACTGTGT  
 GGTAGGAATCGTAGACTAGTGGCAGAGGCAAAGCACATATCTG-----  
 -----AACTGACATA  
 ATCTGTGCTGAAGGCTGGGAACCTCCATT-----GCACCCTGTGGAGGTAAGGCACTTCTT--GGTGCAGGATGTGAT  
 ACAGAAATGTCTGGGACTTCTCATTAGTGAAAGCTGATTTGAAATGCTTTGCTGTCTCATCACTTCTTGTCTCCGTTTGT  
 GTATTTATATAAGTG--CTTCTGCCATCTTCTGTTTACAG--ATATGTGAAACAAAGTAACTTGTAAATGGAGCAGAG  
 GAACCACTCACTCAAAACAACAAATGAAAACACACAGGCAAGAGTGTTCATGCAGAACAGGAGAAG---GTA  
 >Taeniopygia\_GB\_chr17\_1353365-1354175  
 TGCTTTAG--GAGAATGAGAGGCTGAAGCAGGAGATATTTGAGAAGAGCAGTCGGATTGAGGAGCAGAATGAGAAGATC  
 AGTGAGTTGATTGAACGCAACCAGAG--GTAAGGGTGGGAG-----CCTCATTCATTTCCAGACTCTGCAGCT---  
 -TACACTTGGGCATAACT-----  
 -----GAGG  
 GGTTTTGTTAGGAGACAGCCATATTCTGTATATTTGAAATTTTTTTTCCCTAAGGTACTTAAAGTGTAGGATTCTCC  
 ACCCTTT--CTCTGAAGGGCTTATCCCCAAACTCTGATTTACAGTAAACATGAATGTGTAAGGAAAGGAAACAAATCCCT  
 CATGCTGTCTTTGAGCATAATTTGCCCTG-----CTTCTGGGAGTTCTTTATTTGTGCTGGCTCTTTAGTGAAGT  
 G-AAGAAATTTGAGGGGACGTGGTGCCTTTGTG--AAGTTCAGCTGTACCAAGTTACCAAAA-CTCTTGGAGCATGAG  
 GCATTTTCAGAGAGGTGAAGCACTTATCCAG-----CTGATAAAATCTCTG--CTGTGCCAGGCA  
 CAGCCCTCCACCCCTCTGAGATCAGCCTCTTAGCACAGCACA-----  
 -----TGCTGTGAAA  
 TTGTCTGGGACTTGTACAGGTTTCAGCAGAGCTCCTGTGCTTTGGAATATCACTTTTCTGTCT-----  
 -----GAGCCCTGCCTCCAGCC  
 CTGTGTTTCCAGCAATGCCACGGAGTCTCCCTGTTTACAG--GTATGTGGAGCAGAGTAACTTGTGATGGAGCAGAG  
 GAACCACTCCCTGCAGACAACAAACGAGAACACACAGGCAAGAGTGTTCATGCAGAGCAGGAGAAG---GTA

Additional file 3

>CR1-10B\_AMi

CTTGCAACCACGGCCGAAAGGGACCT-  
AGGGGTAGTGATCGACCATCGCATGAACATGAGCCGGCAGTGCGATGCTGTGGCCAGCAGGGGCAAACAA  
CACGCTGGCATGCATTAACCGTTGCATCTCATGCAAACTAAGGAAGTGATACTCCCCTGTACTCCGCAC  
TGGTGAGACCGCAGCTGGAGTACTGCGTCCAGTTCTGGGCGCCGCA--  
CTTCAACAAGGACGTGGAAAACTTGAGAGGGTCCAGAGAAGAGCCAC--  
CCGTATGATCAGGGACTTGCAAGACAAGCCATACGAGGAGAGGCTGAGGGACTTGGGCTCTTCAGCCTA  
CAGAAGAG--AAGGCTGAGAGGGGAC-----TTGGTAGCGGCTTACCGCTACATCAGGGGA---  
GTACATCAAGAACTCGGTGAACAGCTGTTACCAGGGCACCCCTGGGGAAGACCAGGAG-  
CAATGGATACAAACCTCCTGGAAGG---  
CCGCTTCAGGCTCAATTCAGGAAAACTCCTTCACAGTCAGGGTGTCCAGACTGTGGAATAAACTCCCTC  
CAGTGGTGGTGCAGTCACCTACCCTGGAAA-  
TCTTCAAAGGAGACTGGACAGTCACCTCGCTGGGGTCACTTGATTCCTGCCT-AGTG--CA-----  
GGGGGACTGGA-CCCGATGATCT-ACAAGGTCCCTTCCAGC--CCCTAA

>CR1-10B\_CPB

GAAGGAGTACGGCAGAAAGGGATCT-  
AGGGGTATAGTGGACCACAAGCTAAATATGAGTCAACAGTGTGATGCTGTTGCAAAAAAAGCAAACAT  
GATTCTGGGATGCATTAACAGGTGTGTTGTGAGCAAGACACGAGAAGTCATTCTTCCGCTCTACTCTGCGC  
TGGTTAGGCCTCAGCTGGAGTATTGTGTCCAGTTCTGGGCACCGCA--  
TTTCAAGAAAGATGTGGAGAAATTGGAGAGGGTCCAGAGAAGAGCAAC--  
AAGAATGATTAAGGTCTTGAGAACATGACCTATGAAGGAAGGCTGAAAGAATTGGGTTTGTTTAGTTTG  
GAAAAGAG--AAGACTGAGAGGGGAC-----ATGATAGCAGTTTTTCAGGTATCTAAAAGGG---  
TGTCATAAGGAGGAGGGAGAAAACCTGTTACCTTAGCCTCTAAGGATAGAACAAGAAG-  
CAATGGGCTTAAACTGCAGCAAGG---  
GAGGTTTAGGTTGGACATTAGGAAAAAGTTCCTAACTGTCAGGGTGGTTAAACACTGGAATAAATTGCCT  
AGGGAGGTTGTGGAATCTCCATCTCTGGAGA-  
TATTTAAGAGTAGGTTAGATAAATGTCTATCAGGGATGGTCTAGGGTCTGCCA-TGAGGGCA-----  
GGGGA-CTGGA-CTCGATGACCTCTCGAGGTCCCTTCCAGT--CCTAG-

>CR1-10D\_AMi

CCAGCACTACAAATGAAAGGGATCT-  
GGGGGTAACAATAGACCCAGCATGAATATGAGCCGGCAATGCGACGCAGTAGCCGCTAGGGCCAATAA  
AACTCTGGCATGCATCAATCGATGCATCTCCAGTAAATCCAAAGAAGTGATTCTCCCGCTTACTCAACAT  
TGGTGCAGGCTGCAGCTGGAGTATTGCGTCCAGTTCTGGGCGCCGCA--  
CTTCAACAAGGATGTGCTAAAGCTCGAGAGGGTCCAGAGAAGGGCCAC--  
CCGCATGATCAGGGACTTGCAAGACAAGCCATATGAGGAGAGGCTGAGGGATCTCGGACTCTTCAGCCTA  
AAGAAAAG--AAGGCTGAGAGGGGAC-----CTGATTGCGGCTTACCGCTATATCAGAGGC---  
GTACATCAGGGGCTCGGTGAACAACCTGTTACCAGGGTGCCTGGGGGAAAACCTAGAAA-  
CAACGGCCACAACTCCTGGAAGA---  
TAGTTTCAGGCTGAACATTAGGAAAAACTTCTTTACAACACTAGGGTGTCCAGACTATGGAACAAGCTCCCC  
CCAGAGGTGGTGAATCATCTACCCTAGAGG-  
TCTTCAAGAGAAGACTGGACGGTCACCTGGCTGGGGTCACTGATTCCTGCTC--ATG--CA-----GGGGG-  
CTGGA-CCCGATGATCCTTCCAGGGTCCCTTCCAGC--CCT-AT

>CR1-10\_AMi

CTAGCACCACGAATGAAAGGGACCT-  
GGGGGTAATAATAGACCACAGTATGAATATGAGCCGGCAGTGCGATGCTGTAGCCAGTAGGGCAAATAA  
TACTCTGGCATGCATCAATCGATGCATCTCCAGCAAAACCAAGGAGGTGATTCTTCCGCTCTACTCAGCAC  
TGGTGAGACCGCAGCTGGAGTACTGCGTCCAGTTCTGGGCACCACA--  
CTTTAACAAGGACGTGGACAAGCTTGAGAGAGTCCAAAGAAGAGCCAC--  
CCGTATGATCAGAGTCTTAAAAGGCAAGCCATACGAGGAAAGGCTGAGGGATCTGGGACTCTTCAGCCTG  
AGGAAAAG--AAGGCTGAGAGGGGAC-----CTGGTAGCAGCTTACCGCTACACTAGGGGA---  
GTACATCAAGGGCTCGGTGAGCAACTGTTACCAGGGCACCCGAGGGGAAAACCAGGAG-

TAATGGCCACAACTCCTGGAAGA---  
TCGATTCAGGCTCAACATTAGGAAAAACTTCTTCACAGTCAGGGTGTCCAGACTGTGGAATAAGCTCCCTC  
CAGAGGTGGTGCAATCGCCTACCCTGGAAA-  
TCTTCAAGAGGAGACTAGACAGTCACCTTGCTGGGGTCCACCTGATTTCTGCTT-GGTG--CA-----GGGGG-  
CTGGA-CCCGATGATCTTCCGAGGTCCCTTCCGGC--CTT--A

>CR1-10\_CPB

GAAGGAGTACTGCGGAAAGGGATCT-  
GGGGGTCATAGTGGACCACAAGCTAAATATGAGTCAACAGTGTAACGCTGTTGCAAAAAAAGCGAACAT  
CATTCTGGGATGTATTAGCAGGAGTGTGTGTAAGCAAGACACGAGAAGTAATTCTTCCGCTCTACTCCGCGC  
TGATTAGGCCTCAACTGGAGTATTGTGTCCAGTTCTGGGCGCCACA--  
TTTCAGGAAAGATGTGGACAAATTGGAGAAAGTCCAGAGAAGAGCAAC--  
AAAAATGATTAAGGTCTAGAAAACATGACCTATGAGGGAAGATTGAAAAAATTGGGTTTGTTTAGTCTG  
GAAAAGAG--AAGACTGAGAGGGGAC-----ATGATAACAGTTTTCAAGTACGTAAGAGGT---  
TGTTACAAGGAGGAGGGAGAAAAATTGTTCTTCTTAACCTCTGAGGATAGGACAAGAAG-  
CAATGGGCTTAAATTGCAGCAAGG---  
GAGGTTTAGGTTGGACATTAGGAAAAACTTCTAACTGTCAGGGTGGTTAAGCACTGGAATAAATTGCCT  
AGGGAGGTTGTGGAATCTCCATCATTGGAGA-  
TTTTTAAGAGCAGGTTAGACAAACACCTGTCAGGGATGGTCTAGAGTCCTGCCA-TGAGTGCA-----  
GGGA-CTGGA-CTAGATGACCTCTCGAGGTCCCTTCCAGT--CCTATG

>CR1-10\_Crp

GCAGCACAGAGGCAGAGAGGGATCT-  
TGGAGTCATGATTGACTCCATGATGAATATAAGTTGCCAATGCGGTGAAGAAATAGGCAGAGCCAACCAC  
ACCCTGTCATACATCCACAGATGCATCTCAAGCAGGTCCAAGGAGGTGATCCTCCCCCTCTATGCGGCGCT  
GGTCAGGCCCGCAGCTGGAGTACTGTGTCCAGTTCTGGGCGCTGCA--  
CTTCAAGAGGGATGCGGAGAACCTGGAGAAGGTCCAGAGGAGGGCCAT--  
GCACATGGTTGGGGGCTCTGTGGCCAGCCCTGTGAGAAGAGGCTGAGGGACCTGAATCTCTTCAGTATC  
TGCAAGAG--GAGACTGAGGGGGGAT-----CTTGTGGCTGCCACAGCCTTATCAGGGGC---  
CACCAGCAGGGACTCAGGGAAGTCTGTTACCAGGGC-CCCCTTGAGTACCAGGAA-  
CAATGGCCACAAGCTGAGGGAGGA---  
TAGGTTTAGGTTGGATATTAGGAAGAACTACTTCACTGTAAGGGTGGCCAGAGCCTGGAACAGGCTTCCC  
AGASAGGTGGTGCTCTCACCTKCCCTGGAAA-  
TCTTCAAGAGGAGACTGGATAGGCACCTGGCTGGGGTCTTATGAMTTCTGCCC-ATGG--CA-----GGGGG-  
TCAGA-CTMGATGATCTGTCTAGGTCCCTTCCGAC--TCA-CT

>CR1-11\_AMi

CTAGCACCATGACCGAAAGAGACTT-  
GGGGGTCATGATTGACCACAAGATGAATATGAGCCACCAATGCGATACCGCAGCTGGCAAAGCGAACAA  
AACTCTGGCTTGCATCTACCGATGCATCTCGAGCAAGACCCAGGATGTCATCCTCCCCTGTACTCGGCCT  
TGGTGAGGCCCGCAGCTGGAGTACTGCATCCAATTCTGGGCTCCACA--  
ATTTAGGAAGGACGTGGAGAAGCTTGAAAGAGTCCAGAGGAGAGCCAC--  
GCGCATGATCAGAGGGCAAGAGAACAGGCCTTATGAAGAGAGGCTGCGAGCTATGGGACTCTTCAGCCT  
GGAGAAGCG--CAGGCTCAGGGGTGAC-----TTGGTGGCAGCCTATAAGTACATAAGGGGT---  
GTGCATCAGGATCTGGGGGAACACCTGTTACCAGAGCACCCAGGGGATGACAAGGTC-  
CAACGGTCACAACTCCTGCAAGA---  
CCATTTTAGGCTGGACATAAGGAAAAACTTCTTTACTGTCCGAGCCCCAAGGCCTGGAACAGACTCCCC  
CCAGAGGTGGTGAAGCACCTACTCTGGACA-  
CTTTCAAGAAACATTTGGACGTTTATCTTGCTGGGATCCTTTGATTCCTGCCCC-TTGG--GC-----  
AGGGGGCTGGA-CCCGATGATCTTACGAGGTCCCTTCCAGC--CCT--A

>CR1-11\_Crp

AAAT-----GCTGGAGAAAGACCT-  
GGGTGTAAGTATGATCACAGGATGACTATGAGCTACCAGTGTGATGCAGCCATGAAAAAGGCAAATGCA  
ATCCTAGGATGCATGAG--AAGGTATTTCCAGTAGAGATAGGGAAGTATTAATGCCATTGTACAAGG-  
ACTGGTGAGACCTCATCTGGAATACTGTGTACAGTTCTGGTCACCCAT--  
GTTCAAGAAAGATGAATTCAACTGGAACAGGTGCAGAGAAGGGCTAC--  
TAGGATGATCAGGGGAATGGAGAGCCTATCTTATGAGAGGAGACTAAAAGAGCTTGGCTTGTTTAGTCTA

GCAAAACG--AAGGCTGAGAGGGGAT-----ATGATTGCTGCCTGTAAATACATCAGGGGG---  
GTAAACACCAGGGAGGGAGAAGAAGCTGTTTAAGCTAAAGGACAATGTTGGCACAAGAAC-  
AAATGGGTATAAACTGGCCATGAA---  
TAAATTTAGGCTGGAAATTAGAAGAAGGTTCTAACCATCAGAGCAGTGAGGTTCTGGAACAGCCTTCCA  
ATAGGAGTAGTGGGGGCAAAAAACCTAACTA-  
GTTTTAAGATGGAGCTTGATCAGTTTATGAAAGGGATTATATGA-----CA-----GGAGG-T-----  
-----CCCTTCCAGT--CCTA--

>CR1-12B\_CPB

AAGCGACAGAGGAGGAGAGACCT-GGGTGTGTGGGTCGATCACAGGATGACTATGAGCCACCA-  
TGCATGCAGCTGTGAAAAGGCAAATGCGATCCTAGGATGTATCAGGCGAGGCATTTCTAGTAGAGATA  
GAGAAGTATTAATGCCATTGTACAAGGCACTGGTGAGACCTCATCTGGAATACTGTGTACAATTCTGGTC  
ACCCAT--  
GTTCAAGAAAGATKAATTCAACTGGAACAGGTGCAGAGAAGAGCTACGGTAGGATGATCAGGGGAATG  
GAGGGCCTATTTTATGAGACGAGACTGGAAGAGCATGGCTTGTTTAGCCTAGCAAAAAG--  
AAGGCTGAGAGGGGAT-----ATGATTGCTCTCTATAAATACATCAGAGGG---  
GTAAACACCAGGGAGGGTGAAGAGCTATTTAAGCTAAAGGACAATGTTGGCACAAGAAC-  
AAATGGGTATAAGCTGGCCMTGAA---  
CAAATTCAGGCAGGAAATTAGAAGAAGGTTTCTAATCATCAGAGGAGTGAGGTTCTGGAACAGCCTCCCA  
CTAGGAG--GTTGGGGCAATCAACTTAACTA-GTTTTAAGAGAG-GCTGGACACATT--  
TGAGTGCGATTGTATGATGGCCTGTGA-TATA--CA-----GGAGG-TCAGA-CTAGATGATC--  
TGGTGTGCCCTTCTGGC--CTTA--

>CR1-12\_CPB

AAGTGACAGAGGAGGAGAGACCT-  
GGGTGTGGGGTCAATCACAGGATGACTATGAGCCACCAGTGTGATGCAGCCATGGAAAAGGCAAATGC  
AATCCTAGGATGTATCAGGCGAGGCATTTCCAGTAGAGATAGAGAAGTATTAATGCCATTGTACAAGGCA  
TTGGTAAGATCTCATTGGAATACTGTGCACAATTCTGGTCACCCAT--  
GTTCAAGAAAGATTAATTTAACTGGAACAGGTGCAGAGAAGAGCTAC--  
TAGGATGATCAGGGGAATGGAGCCTAT---  
CTATGAGAGGAGACTGGAAGAGCTTGGCTTGTTTAGTCTAGCAAAAAG--AAGGCTGAGAGGGGAT-----  
ATGATTGCTCTCTATAAATACATTAGGGG----  
GTAAATACCAGGGAGGGTGAAGAGCTATTTAAGCTAAAGGACAATGTTGGCACAAGAAC-  
AAATGGATATAAACTGGCCATGAA---  
CAAATTCAGGCTGGAAATTAGAAGAAGGTTTCTAACCATCAGAGGGATGAGGTTCTGGAACAGCCTCCCA  
ATAGGAGTTGTGGGGGCAACAACCTTAACTA-  
GTTTTAAGAGAGAGCTGGACAAATTTATGAGTGCGATTGTATGATGGCCTGTGA-TATA--CA-----GGAGG-  
TCAGA-CTAGATGATC--TGGTGGTCCCTTCTGGC--CTTA--

>CR1-12\_Crp

CTGGCACAGCATCTGAAAGGGACCT-  
GGGGGTGACAATCGACCAGAAGATGAACATGAGCCAACAGTGCATGAAGTCGCCAGCAGGGCAAATAG  
AACTCTGGCGTGCATCAGCCGATGTGTTGCCAATAGATCCAGGGAGGTGCTCCTCCCCCTCTATTCGGCAT  
TGGTGAGGCCACAGCTGGAGTACTGTGTCCAGTTCTGGGCACCGCA--  
CTTCAGGAAGGATGTGGATAAGCTTGAGAGGGTACAGAGAAGGGCCAC--  
CCATATGATTAGGGGCCTGGAGGATAGGCCCTATGAGGAGAGACTCCGGGAACTGGGCCTGTTTCAGTCTG  
AGTAAGAG--AAGACTGAGAGGTGAC-----TTGATAGCTGCCTACAAGTATGTCAGGGGT---  
GAGCACAAGATCTAGGGGAGCAACTCTTCAGGAAGGCACCCCTTGGGAGGATGAGGAC-  
CAATGGGCACAAGCTAATTGAGGG---  
AAAATTTAGGCTGGACATAAGGAAAAACTTCTTTTCCATAAGGGTAACTAGAATCTGGAACACACTCCCA  
GCAGAGGTGGTGCAGTCGCCATCCTTGGAGG-  
TGTTCAAGAGGAGGCTGGACAAGCACCTCGTTGAGCTTGTGTTGACCTCCTGCC-ATGG--CA-----GGGGA-  
CCGGA-CTTGATGATCTTGC-AGGTCCCTTCCAGT--CCT-TT

>CR1-13\_AMi

-----  
AAMAAGGGATTAGAAAATAATACTGAATGTAGTACAATGCCATTATATAAACCGATGATGCA--  
CTTCACTTGAATACCACGTTTCAGCTCTGGTCACCCTA--TTTCAAAGAAATAGAGCAGAAAC----

AAGGAGTTCGAGACAGGCAAC--GAAAATGATTAGAGG--  
CAGAGAGACTTCCATATGAAGAGAGAATGAAGA---CTGGACTGTTTGTAGTTTGTAGAGAGGAG--  
ATGAATGAGGGGGGCAT-----GATAGAGGTATACAAAATAATGAATGG-----  
ACAGGGGAGCAATCGGGAGCTCCTATTTACCTTTTCTCATAACACAAGAACAAGG---  
ACATTC AATGAAATTGAAAGGCAA---  
CAATTTAAA AACTGATAAAAAGGAAATGCTTTTTTTTACACAATGCATAATTAACCTGTGGA AACTCACTGCCAC  
AAGATATCACTGAGGCCAAGAGCTTAGCAG-GATTCAAAAAG-  
GATTAGACATTTATATGACTGACGGGGTTAGGGCCACTGTCA-GAGA--CA-----GGATA-CTGGA-  
CTAGATGGAC--CACTGGTCATTCC-----

>CR1-14\_AMi

CTGTTACCACACAGGAAAGAGATCT-  
GGGAGTCATTGTGGACAGTTCGCTAAAAACATCAGCTCAGTGCTCAGCAGCCGTCAAAAAGGCAAACAA  
AATGTTAGGGATTATTAAGAAGGGAATTGTAACAACAAACGGAAAGTATCATTATGCCCTTTATAAATCC  
ATGGTGCCTCCACACCTTGAATACTGTGCCAGTTCTGGTCCCCACA--  
CCTCAAAAAGGATATAGAAGAACTAGAGAAGGTACAGAGAAGGGCAAC--  
AAGGATGATTAGCGGTATGGAGGGGCTTCCATATGAGGAGAGACTAAAGAGGGCTAGGCCTATTCAGTTTA  
GAAAAGAG--ACGCTTGAGGGGGGAC-----ATGATAAGGGTTTACAAAATACTAAATGGC---  
GAAGAGAAAGTAAATAGGGATTTATTATTTACTC--TCTACAATACAAGAACTAGGGG-  
TCACAAAATGAACTAGTAGGTAG---  
TAAGTTTAAA AACTAACAAAAGGAAGTTCTTTTTTACACAGCGTGTAATTAAGTGTGGA AACTCATTGCCAC  
CAGATGTTGTGGAAGCTGACAGTTTAGCCA-  
GATTCAAAAAGGGATTGGACAAATTCTTGAGCATGGGAGTTAGGGCCACTGTGT-GACA--CA-----GGATA-  
CTGGG-CGAGATGGAC--CTATGGTCTGACCCAGTAAATGGCA

>CR1-14\_Croc

AAAGCACAGAGGCGGAAAGGGATCT-  
TGGAGTCATTATTGACTCCAAGATGAACATGAGCCGCCAATGCCAGACCCGCAGCCAGCAAGGCCAGCCAT  
ACCTTGTCATGCATCCAAAGATGCATCTCAAGCCGGTCCAGAGAGGTGATACTCCCCCTCTATGCGACTTT  
GGTCAGGCCGCAGTTGGAGTACTGCGTCCAGTACTGGGCGCCGCA--  
CTTCAAAAAGGGATGTGGCCAGCCTGGAGAGGGTTCAGAGGAGGGCCAC--  
CCGCTTGGTGTGAGAGGGCAGCAGGACAGGCCCTATGAGGAGAGACTGAGGGACCTGAACCTGTTCAGCCT  
CAGCAAGAG--GAGGCTGAGGGGGGAC-----CTGGTGGCTGCCTACAACTCATCAGGGGA---  
GATCAACAGCAAATAGGAGA-GCCTTTTTCTCCCCAGCACCACCTGGGGTGACGAGGAA-  
CAATGGTAATAAGCTGATGGAGAA---  
TAGGTTTAGGTTAGAGATCAGAAGGCAATATTTTACAGTTAGGGTGGCCAAAATCTGGAACCAACTTCCC  
AGGGAAGTGGTCCTCGCCCCTACCTTGGGCA-  
AATTC AAGAGGAGGTTGGATGATCACCTGTCTGGGGTCTTGTGAATTCCTGCCT-GTGG--CA-----GGGGG-  
TCAGG-CTAGATGATCTGTT CAGGTCCCTCCTGAC--CCT--A

>CR1-15\_AMi

CTGTTACGACTCAGGAAAGAGACCT-  
TGGAGTCATTGTAGATAGTTCTCTAAAAACGTCAGCTCAGTGTCAGCGGCGACCAAAAAAGCCAATAAA  
ATGTTGGGCATCATT AAGAAGGGAATTGAAAACAAAACGGAGAACATCATGCCATTATACAAATCCA  
TGGTGCGCCACATCTTGAATACTGTGTGCAGTTCTGGTCTCCGCA--  
TCTCAAAAAGGATGTAGTAGAATTAGAAAAGGTACAGAGAAGGGCAAC--  
CAAAATGATCAGGGGCATGGAGCAGTTGCCATACCAGGAGAGACTAAAAAGGCTAGGACTCTTCAGTTTG  
GAAAGAAG---GCT---GAGGGGAT-----ATGATAGAGGTCTATAAAATCATGAAGGGT---  
GTGGACCAAGTGAACAGGGA AACTGTTGTTACCAAGTCCCAGAATACTAGA AACTAGGGG-  
GCACCCACTGAAATTAGTAGGAGA---  
CAGGTTTAAA AACTAACAAAGAGAAAGTACTTTTTTACGCAACGCATAGTTAACTTGTGGA AATTCATTGCCAC  
AGGAGGTGGTGTAGAGGCAGATAGCATAGCCA-  
GGTTCAAAAAGGGACTAGACAAATTCATGAACAGAATGGTTGGA-CCACTGTCG-GAGA--CA-----GGATA-  
CTGGG-CTAGATGGAC--CATTGGTCTGACCCAGT--ATGGCA

>CR1-16\_Croc

GCAGCACAGAAGCGGAAAGGGATCT-  
CGGAGTCATAGTGGACTCCAAGATGAACATGAGTCGTCAGCGTGACGAAATCATCAGCAAAGCTAACCGC

ACTTTATCATGCATCAGCAGATGCATGACAAATAGATCCAAGGAGGTGATACTTCCCCTCTATGCGGCATT  
GGTCAGACCGCAGTTGGAGTACTGCGTCCAGTTTTGGGCGCCGTA--  
CTTCAAGAAGGATGTTGATAGACTCGAGAGGGTCCAGAGGAGGGCCAC--  
TCGTATGGTTAGGGGCTTACAGGACAAGCCCTATGAGGAGAGACTGAGGGACCTGGACCTCTTCAGCCTC  
CGCAAGAG--AAGGCTGAGAGGTGAT-----CTTGTGGCCGCCTACAAATTCATTAGGGGG---  
ACGCAGCAAGGGATCGGAGATGCTCTGTTACCAGGGCGCCTCTTGGGGTAACAAGGAA-  
CAATGGTCACAACTGACAGAGAG---  
CAGATTTAGGCTAGATATCAGGAAAACTTCTTCACGGTAAGGGTGGCCAAAATTTGGAATGGGCTTCCA  
AGGGAGGTGGTGTCTCTCCCCTACCTTGGGGG-  
TCTTTAAGAGAAGGCTGGATAGGCATCTGGCTGGGGTGCATCTGATTTCTGCCT-A-GG--CA-----GGGG-  
TCGGA-CTCGATGATCTGTTGAGGTCCCTTCCGAC--CCT-A-

>CR1-17\_Ami

TCAACACGGTGGCAGAAAGGGATCT-  
TGGAGTCATTGTTGACTCCAGGATGAACATGAGCCGCCAATGCGAGGAAGCGGTTCAGTAAGGCTAACCGC  
ACCTTGTGTCGTCATCTACAGATGCATCACAAGCAGGTCCAGGGAGGTGATCCTTCCCCTCTATGCGGCATT  
GGTCAGGCCGCAGTTGGAGTACTGCGTCCAGTTCTGGGCGCCGCA--  
CTTCAAGAGGGATGTGGCTAGCATTGAGAGGGTCCAGAGGAGGGCCAC--  
TCGCATGGTCAAGGGGCAGCGGGGCAGGCCCTACGAAGAGAGGCTAAAGGGCCTGAACCTATTCAGCCT  
CCACAAGAG--AAGGCTGAGAGGGGAT-----CTGGTGGCCGTTTACAAACTCACCAGGGGG---  
GACCAGCGGAATTGGGGGAGGCTCTGTTCCCCCGGGCACCACCCGGGGTACTAGGAA-  
TAACGGCCACAAATTGTTAGAGAG---  
AAGGTTCAGGCTGGACATCAGGAGACATTACTTTACAGTTAGGGCTGCCAGGCTCTGGAATGGGCTCCA  
AGTGAGGTGGTGTCTCTCCTACCTTGGGGG-  
TCTTCAAGAGGAGGCTGGACAGATATTTGGCTGGGGTGCATGAGTTCTGCC-AGAG--CA-----GGGG-  
TCGGA-CCTGATGATCTGTTTAGGTCCCTTCCGAC--CCT-A-

>CR1-17\_Croc

CTAGCACCACGTCCGAAAGGGACCTGGGGGGTGCATAATTGACCATAAAATGAATATGAGCCACCAGTGTG  
ATGCTACAGTTAGCAGAGCAAACAATACGCTGGCATGCATCAACCGATGCATCTCAAGCAAACTAAGGA  
AGTTATTCTCCCGCTCTACTCAGCATTGGTGAGGCCGCAGCTGGAGTACTGCGTCCAGTTCTGGGCGCCAC  
A--CTTCAAGAAGGATGTGGAGAAGCTTGAGAGAGTCCAGAGAAGAGCCAC--  
TCGTATGATTAGAGGCCTGAAGAGCAAGCCATACGAGGAAAGGCTGACAGATATGGGACTGTTTCAGCCTA  
GAAAAGAG--AAGACTTTGGGGGGAT-----TTGGTGGCAGCTTACAAATATATCAGGGGT---  
GAGCATCAGGGGCTAGGGCAACAATACTTACCAAAGCGCCCCAGGGGAAAACCAGGAG-  
CAACGGTCATAAACTCCTAGAAGA---  
AGGTTTCAGACTGGATATAAGGAAAACTTCTTCACGGTTCGTGTGACCAGACTCTGGAATAGACTCCA  
GCAGGGGTGGTGCAGGCACCTACCCTGGAGA-  
TCTTCAAAAGGAGACTGGACGCACACCTTGCTGGGGTATTGATTTCTGCC-AGAG--CA-----  
GGGGGGCTGGA-CCCGATGATCTCACGAGGTCCCTTCCAGC--CCT-AA

>CR1-17\_Gav

TCAGCACAGAGGCGGAAAGGGATCT-  
TGGAGTCATTGTTGACTCCAGGTTGAACATGAGCCGCCAATGCGAGGAAGCTGTCAGTAAGGCTAACCGC  
ACCTTGTGCATGCATCCACAGATGCATCACAAGCAGGTCCAGGGAGGTGATCCTCCCCCTCTATGCAGCATT  
GGTCAGGCCGCAGTTGGAGTACTGCGTCCAGTTTTGGGCGCCGCA--  
CTTCAAGAGAGATGTGGCTAGCATTGAGAGGGTCCAGAGGAGGGCCAC--  
TCGCATGATCAGGGGGCAGCAGGGCAGGCCATACGAGGAGAGACTAGAGGGCCTGAACCTATTCAGCCT  
CCACAAGAG--AAGGCTGAGGGGGGAT-----CTGGTGGCCGTCTACAAATTCACCAGGGGG---  
GATCAGCAGGGAATAGGAGATGCCCTGTTCCCCCGGGCACCACACGGGGTAACTAGGAA-  
TAATGGCCACAAGTTGATAGAGAG---  
CAGGTTCAGGCTAGACATCAGGAGGCATTACTTTATGGTTAGGGTGGCTAGGACCTGGAACCAACTTCCA  
AGGGAAGTGGTGTCTCGCTCCTACCTTGGGGG-  
TCTTTAAGAGGAGGCTGGATAGACACCTGACTGGGGTGCATATGAATTCCTGCC-AAGG--CA-----GGGG-  
TCGGA-CTTGATGATCTGTTTAGGTCCCTTCCGAC--CCT-A-

>CR1-18\_Crp

GCAGCACAGCAGCGGAAAGGGATCT-



TGGAGTCATAGTTGACTCCAAGATGAACATGAGTCGTC AATGTGACGAAGTGATCAACAAGGCTAACCGC  
ACTTTATCATGCATTAGCAGATGCATGACGAACAGGTCCAGGGAGGTGATGCTTCCCCTCTATGCGGCACT  
GGTCAGGCCCGCAGTTGGAGTACTGCGTCCAGTTTTGGGCGCCGCA--  
CTTCAAGAGGGATGCGGAGAATCTTGAGAGGGTTCAGAGGAGGGCCAC--  
TCGTATGGTCAGAGGCCTGCAGGCAAGGCCCTACGAGGAGAGACTGAGGGACCTAGATCTCTTCAGCCTT  
CGAAGAG--AAGGCTGAGAGGTGAT-----CTTGTGGCTGCCTATAAATTCATCAGGGGA---  
GGGCAGCAGGGAATAGGAGATGCTCTATTTACTAGGGCACCCCCTGGAGTAACTAGGAA-  
CAATGGCCACAAATTGATGGAGAG---  
CAGATTTAGGTTGGACATTAGAAAGAACTTCTTCACAGTAAGGGTTGCCAGAATCTGGAATGGGCTTCCA  
AGGGAGGTGGTGTCTCTCCCCTACCTTGGGGG-  
TCTTCAAGAGGAGACTGGACAAGCACCTAGCTGGGGTCATCTGATTTCTGCCC-AGGG--CA-----GGGGG-  
TCAGA-CTCGATGACCTACTGAGGTCCCTTCCGAC--CCT-A-

>CR1-1B\_CPB

CTGTTACCACTCAAGAAAGAGATCT-  
TGGAGTCACTGTGGATAGTTCTCTGAAAACATCCACTCAATGTGCAGCGGCAGTCAAAAAAGCGAACAGA  
ATGCTGGGAATAATTAAGAAAGGGATAGATAATAGGACAGAAAATATCATGTTGCCTCTATATAAATCCA  
TGGTACGCCACATCTTGAATACTGTGTGCAGATGTGGTTCGCCCCA--  
TCTCAAAAAAGATATATTGGAATTGGAAAAGGTTTCAGAAAAGGGCAAC--  
AAAAATGATTAGGGGTATGGAACGGCTTCCGTATGAGGAGAGATTAATAAGACTGGGACTTTTCAGCTTG  
GAAAAGAG--ACGGCTAAGGGGAGAT-----ATGATTGAGGTCTATAAAATCATGACTGGT---  
GTAGAGAAAGTAGATAAGGAAGTGTGTTTACTACTTCTCATAACACAAGAACTAGGGG-  
TCACCAATGAAATTAATAGGCAG---  
CAGGTTTAAAACAAATAAAAAGGAAGTATTTCTTCACACAACGCACAGTCAACCTGTGGAACCTCCTTGCCA  
GAGGATGTTGTGAAGGCCAAGACCATAACAG-  
GGTTCAAAAAAGAACTAGATAAATTCATGGCCAGGATGGGCAGGGCCACTGTCCGGAAGA--CA-----  
GGATA-CTGGG-CTAGATGGAC--CTTGGTCTGACCCAGT--AGGGCC

>CR1-1\_ACo

ATAGTAGTAACTGTGAGAGGGATCT-  
TGGAGTCCTAGTGGACAATCACTTAAATATGAGCCAACAGTGTTCGTGCAGCTGCCAAAAAGCCAATACA  
ATCCTRGGCTGCATWAACAGAGGGATAGAATCAAGATCATGTGAAGTRTTAATACCACTTTATAAAGCCT  
TGTAAGGCCACACTTGAATACTGCATCCAGTTTTGGTACCACG--  
ATGTAAAAAAGATGTTGAGACTCTAGAAAGAGTACAGAGAAGAGCAAC--  
AAAGATGATTAGGGGACTGGAGGCTAAAACATATAAGGAACGGTTGCTGGAATTGGGTATGTCTAGTCTA  
ATGAAGAG-AAGGACT-AGGGGGGAC-----ATGATAGCAGTGTTCCAATATCTCAGGGGC---  
TGCCACAAAGAAGAGGGGGTCAAGCTATTCTCAAAGCGCCTGAAGGCAGGACAAGAAG-  
CAACGGATGGAACTAATCAAGGA---  
GAGAAGCAACCTAGA ACTAAGGAGAAATTTCTGACAGTGAGAACAATTAACCAGTGGAACAACYTGCC  
TCCAGAAGTTGTGGGTGCTCCAWCACTGGAGG-  
TTTTTAAGAAGAGACTGGACAGCCATTTGTCTGAAATGGTATAGTTTCTGCT--GAG--CA-----GGGGG-  
TTGGA-CTAGAAGACC-TCCAAGGTCCCTTCCAAC--TCTATT

>CR1-1\_CPB

CTACA ACTAATCAGGAAAGAGATCT-  
TGGAGTCATCGTGGATAGTTCTCTGAAGACGTCCACGCAGTGTGCAGCGGCAGTCAAAAAAGCAAACAGG  
ATGTTAGGAATCATTAAAAAAGGGATAGAGAATAAGACGGAGAATATCTTATTGCCCTTATATAAATCCA  
TGGTACGCCACATCTTGAATACTGCGTACAGATGTGGTCTCCTCA--  
TCTCAAAAAAGATATACTGGCATTAGAAAAGGTTTCAGAGAAGGGCAAC--  
TAAAATGATTAGGGGTTTGGAACGGGTCCCATATGAGGAGAGATTAAGAGGCTAGGACTTTTCAGCTTG  
GAAAAGAG--GAGACTAAGGGGGGAT-----ATGATAGAGGTATATAAAATCATGAGTGGT---  
GTGGAGAAAGTGAATAAGGAAAAGTTATTTACTTGTCCATAATATAAGAACTAGGGG-  
CCACCAATGAAATTAATGGGCAG---  
CAGGTTTAAAACAAATAAAAAGGAAGTTCTTCTTCACACAGCGCACAGTCAACCTGTGGAACCTCCTTGCC  
GAGGAGGTTGTGAAGGCTAGGACTATAACAG-  
GGTTTAAAAGAGA ACTAGATAAATTCATGGCCAGGATGGGTAAAGGCCACTGTCCGGTAGA--CA-----  
GGATA-CTGGG-CTGGATGGAC--CTTGGTCTGACCCAGT--ATGGCC

>CR1-1\_Croc

GCAGCAGCTCTGCAGAAAAGGACCT-  
GGGGGTACAGTGGACAATAAGCTGAATATGAGCCAACAGTGTGCCCTTGTGGCCAAGAAGGCTAACGGC  
ATACTGGGCTGCATTGGTAGGTGTGTTGCCAGCAGGTCAAGGGAAGTGATTATCCCTCTATTTCAGCACT  
GGTGAGGCCACATCTGGAGTACTGTGTTTCAGTTTTGGGCCCCCA--  
CTACAGAAAGGATGTGGACAAATTGGAGAGAGTCCAGCGGAGGGCAAC--  
AAAAATGGTGAGGGGGCTGGGGCACATGACTTATGAGGAGAGGCTGAGGGAACTGGGCTTATTTAGTCT  
AGAGAAGAG--AAGACTGAGAGGGGAT-----TTAATAGCAGCCTTCAACTACCTGAAGGGG---  
GGTTCCAAGAGGATGGAGCTAGACTGTTCTCAGTGGTGGCAGATGACAGAACAAGGAG-  
CAATGGTCTCAAGTTGCAGCAAGG---  
GAAGTTTAGGTTAGATATTAGGAAGAATTTTCTCACTAGGAGGGTAGTAAAACACTGGAACAGGTTACCC  
AGAGAGGTGGTGAATCTCCATCCTTGGAGG-  
TTTTCAAGACCCGGCTAGACAAAGCTTTGGCTGGGATGATCTAGGGTCCTGCTT-TGAG--CA-----GGGGG-  
TTGGA-CTAGATGACCTCCTGAGGTCCCTTCCAAC--CCTAAT

>CR1-1\_Gav

CCAGCACCACAACCTGAACGAGACCT-  
GGGTGTCATGACTGACAACAAAATGAACATGAGCCACCAATGCGATGCCGTAGCTGGCAGAGCTAACCA  
AACACTGGCATGCATCCACCGAGGCATCTTGAGCAAGGCAAAGGATGTCATCCTCCCCTTTACTCGGCC  
TTGGTGAGACCGCAACTGGAGTACTGCGTCCAGTTCTGGGTGCTGCA--  
CTTCAAGAAGGATGTGGAGAAGCTCAAGAGAGTCCAGAGGAGGGCCAC--  
ATGCATGATTAGAGGCCTGGAGACCAAGACGTATGAGGAGAGGCTGAGGGACTTGGGATTGTTTCAGCCTG  
GAGAAGAG--AAGACTCAGGGGGGAC-----TTGGTTGCAGCCTATAAGTATATCAGGGGC---  
GTACATCAGGGTTTGGGGGAGCATCTATTCACCAAGGCCCCCCCAGGGGAGGACAAGAAA-  
TAATGGGCACAAGCTGATTGAAGA---  
TCGCTTCAGGCTAGACATAAGGAAAAACTTCTTTACAAGCCGAGTGCCGAGGGTTTGGAACAGGCTCCCC  
CCAGAAGTGGTACAGTCATCCACCCTGGCGA-  
TCTTCAAAAACGTCTTGATGCCCATCTTGCTGGGATCATTGATTTCCTGCCCACGTG--CA-----  
GGGGGGCTGGA-CCTGATGATCT-GTAAGGTCCCTTCCAGC--CCC-TA

>CR1-1\_PMo

ATAGTAGTAACTGTGAGAGGGATCT-  
CGGAGTCCTAGTGGACAATCACTTAAATATGAGCCAGCAGTGTGCTGCAGCTGCCAAAAAAGCCAACACA  
GTGCTAGGCTGCATTAACAGAGGGATAGAATCAAGATCACGTGAAGTGTTAATACTACTTTATAATGCCT  
TGGTAAGGCCACACTTGGAACTACTGCATCCAGTTTTGGTACCACG--  
ATGCAAAAAGATGTTGAGACTCTAGAAAGAGTGCAGAGAAGAGCAAC--  
AAAGATGATTAGGGGACTGGAGGCTAAAACATATAAGGAACGGTTGC-GGAATTGGGTATGTCTAGT-  
TAATGAAGAG-AAGGACTGAGGGGAGAC-----ATGATAGCAGTCTTCCAATACTTGAAGGGC---  
TGCCACAGGGAAGAGGGCATTGATTTATTCTCCATAGCACCTGAGGGTAGGACAAGAA--  
CAATGGGTGGAAGCTTTACAGAGA---GAGATCCAAC--  
GAAATAAGGAGGAATTTCTGACTGTGAGAAC--TTAAGCAGTGGAACAGCTCCCTCCTGGA-  
GTTGTGGGTGCTCCATCAGCTGGAG-GTTTCAAGAAAGA--TGGACAGCCATTTGTC----  
AAGGTATGAATTCCTGCCT-TGGG--CA-----GGGGG-TTGA-CTAGAAGACC-TCCAAGGTCCCTTCCAAC--  
CCTATG

>CR1-20\_AMi

CTGGCACAGCATCTGAACGAGACCT-  
GGGGGTCACAATCGACTGGAAGATGAATATGAGCCAACAGTGTGCGATGAGGTTGCCAGAAGGGCAAATAG  
AACTCTGGTGTGCATCAGCCGATGTGTTGCCAATAGATCCAGGGAGGTGCTCCTCCCTCTCTATTTCGGCGT  
TGGTGAGGCCTCAGCTGGAGTACTGTGTCCAGTTCTGGGCACCGCA--  
CTTCAGGAAGGATGTGGATAAGCTCGAGAGGGTACAGAGAAGGGCCAC--  
CCATATGATTAAGGGCATGGAGGATAGGCCCTATGAGGAGAGACTCCAGGAACTGGGCTGTTCAGTCTG  
AGTAAGAG--AAGGCTGAGAGGTGAC-----TTGATAGCCGCTACAAGTACGTCAGGGGT---  
GAGCACCAGATCTAGGGGAGCAACTTTCAGGAAGGCACCTCAAGGGAGGACGAGGAC-  
CAATGGGCATAAGCTAATAGAGGG---  
TAAATTCAGGCTGGACATAAGGAAAAACTTCTTCTCTGTAAGGGTCACCAGAATCTGGAACACACTCCCA  
GCAGAGGTGGTGCAGTCACCCTCCTTGGAGG-

TGTTCAAGATGAGGCTGGACAAGCACCTTGTTGAGCTCGTCTGACTTCCTGCCC-ATGG--CA-----GGGGA-  
CTGGA-CTTGATGATCTTAC-AGGTCCTTCCGGT--CCT-AT

>CR1-2B\_CPB

GCAACAGTTCTGCAGAAAAGGACCT-  
GGGGATTACAGTGGACGAGAAGCTGGATATGAGTCAGCAGTGTGCCCTTGTTGCCAAGAAGGCCAACAG  
CATATTGGGCTGTATTAGTAGGAGCATTGCCAGCAGATCGAGGGAAGTGATTATCCCTCTATTTCGGCAC  
TGGTGAGGCCACACCTGGAGTATTGCGTCCAGTTTTGGTCCCCCA--  
CTACAGAAGGGATGTGGACAAATTGGAGAGAGTCCAGCGGAGGGCAAC--  
GAAAATGATTAGGGGGCTGGGGCACATGACTTACGAGGAGAGGCTGAGGGAAGTGGGCTTATTTAGTCTG  
CAGAAGAG--AAGAGTGAGGGGGGAT-----TTGATAGCAGCCTTCAACTACCTGAAGGGG---  
GGTTCAAAGAGGATGGAGCTAGGCTGTTCTCAGTGGTGGCAGATGACAGAACAAGGAG-  
CAATGGTCTCAAGTTGCAGTGGGG---  
GAGGTCTAGGTTGGATATTAGGAAACACTATTTCACTAGGAGGGTGGTGAAGCACTGGAATGGGTTACCT  
AGGGAGGTGGTGAATCTCCATCCTTAGAGG-  
TTTTTAAGGCCMGGCTTGACAAAGCCCTGGCTGGGATGATTTAGGGTCTGCTT-TGAG--CA-----GGGGA-  
TTGGA-CTAGATGACCTCCTGAGGTCTCTTCCAAC--CCTAAT

>CR1-2B\_Croc

CTAGCACCACGGCTGAAAGAGACTT-  
GGGGGTCATGATTGACCACAAGATGAACATGAGCCACCAATGCGATGTGCGCAGCTGGTAAAGCAAACAA  
AACTCTGGCTTGCATCCATAGATGCTTCTCAAGTAAATCTCAGGATGTCATCCTCCCGCTGTACTCGGCCT  
TGGTGAGGCCGCGCAGCTGGAGTACTGCATCCAATTCTGGGCTCCGCA--  
ATTCAAGAAGGATGTGCGAGAAGCTTGAGAGAGTCCAGAGGAGAGCCAC--  
GCGCATGATCAGAGGGCAAGAGAACAGGCCTTATGAAGAGAGGCTGAGAGCCATGGGACTCTTCAGCCT  
GGAAAAGCG--CAGGCTCAGGGGGGAC-----CTGGTGGCTGCCTATAAGTACATAAGGGGT---  
GTACATCAGGATCTGGGGGAACGTCTGTTTACCAGAGCGCCCCAAGGGAAAACAAGGAC-  
CAACGGTCATAAACTCCTCCAAGA---  
CCATTTTAGGCTGGACATAAGGAAAACTTCTTTACTGTCCGAGCCCCAAGACCTGGAATAGACTCCCTC  
CAGAGGTGGTGCAGGCACCTACTCTGGACT-  
CATTCAAGAAACGTTTGGATGCTTATCTTGCTGGGATCCTTTGATTCCTGCCCC-TGGG--GC-----  
AGGGGGCTGGA-CTCGATGATCTT-CGAGGTCCCTTCCAGC--CCT--A

>CR1-2B\_Crp

TCAGCACAGAGGCAGAAAAGGATCT-  
TGGAGTCATTATTGATTCCAAGATGAACATGGGCCACCAATGTGAGGACGCGGTGAGTAAGGCTAACCGC  
ACCTTGTGCATGCATCCACAGATGCATCACGAGCAGGTCCAAGGAGGTGATCCTCCCCCTCTATGCAACATT  
GGTCAGGCCGCGCAGTTGGAGTACTGCATCCAGTTCTGGGCGCCGCA--  
CTTCAGGAGGGATGTGGACAGCATTGAGAGGGTCCAGAGGAGGGCCAC--  
TCACATGATCAGGGGGCAGCAGGGCAGGCCCTACGAGGAGAGGCTACGGGACCTGAACCTGTTTACGCT  
CCACAAGAG--AAGGCTGAGAGGGGAT-----CTGGTGGCCATCTATAAACTTGCCAGGGGG---  
GACCAGCAGGCAATGGGAGAGTCCCTGTTCCCCGAGCACTACCAGGAGTAAC-AGGAA-  
TAACGGCCACAAGTTGACTGAGAG---  
TAGGTTTACGGCTAGACATCAGGAGGCACTACTTCACAGTCAGGGCGGCTAGGATCTGGAACCAACTTCCA  
AGGGAAGTGGTGTCTCGCTCCTACCCTGGGGG-  
TCTTTAAAAGGAGGCTAGATAATCACCTAGCTGGGGTCATTTGATTTCTGCCC-ATGG--CA-----GGGGG-  
TCGGA-CTTGATGACCTGCTCAGGTCCCTTCCGAC--CCT-A-

>CR1-2C\_Croc

CTAGCACTACGGAAGAAAGAGACTT-  
GGGGGTCATCATTGACCACAAGATGAACATGAGCCTGCAATGCGATGTGCGGCTAGTAAAGCGACCAA  
AACGCTGGCTTGCATCCATAGATGCTTCTCAAGCAAATCCCGGGACGTCATTCTCCCTTGTACTCGGCCT  
TGGTGAGGCCGCGCAGCTGGAGTACTGCGTCCAGTTTTGGGCTCCACA--  
ATTCAAAAAGGATGTGGAGAAGCTTGAGAGAGTCCAGAGAAGAGCCAC--  
GCGCATGATCAGAGGTCAGGAAAACAGACCTTACGATGACAGGCTGAGAGCCATGGGGCTCTTTAGCCTG  
GAAAAGCG--CAGGCTCAGGGGTGAT-----CTGATGGCCACCTATAAGTTTATCAGGGGT---  
GACCACCAGGATCTGGGGGAACGTTTGTTCACCAGAGCGCCCCAAGGGATGACGAGGTC-  
GAACGGTCATAAACTACTGCAAGA---

CCGTTTCAGGCTGGACATAAGGAAGAATTTCTTTACTGTCCGAGCCCCCAAGGTCTGGAACAGCCTGCCAT  
CGGAGGTGGTTCAAGCACCTACATTGAACA-  
CCTTCAAGAGCAAATTGGATGCTTATCTTGCTGGGATCCTATGATTCCTGCCCT-TCGG--GC-----  
GGGGGGCTGGA-CTCGATGATCTTCCGAGGTCCCTTCCAGC--CCT--A

>CR1-2\_AMi

CTAGCACTACGGACGAAAGGGACTT-  
GGGGGTCATGATTGACCACAAGATGAACATGAGCCTTCAATGTGATGCTGCGGCTAGTAAAGCGAGCAAA  
ACGCTGGCTTGCATCCATAGATGCTTCTCAAGCAAATCCCAGGACGTCATTCTCCCGTTGTACTIONCGGCCTT  
GGTGAGGCCGACGCTGGAGTACTGCGTCCAGTTTTGGGGCTCCACA--  
ATTCAAAAAGGATGTGGAGAAGCTTGAGAGAGTGCAGAGGAGAGCCAC--  
GCGCATGATCAGAGGTCAGGAAAACAGACCTTATGATGAGAGGCTGAGAGCCATGGGACTCTTCAGCCTG  
GAAAAGCG--CAGGCTCAGGGGTGAT-----CTGGTGGCCGCCTATAAGTTTATCAGGGGT---  
GCTCACCAGGATCTGGGGGAACGTCTGTTCACCAGAGCGCCCCAAGGGATGACAAGGTC-  
GAACGGTCACAACTCCTCCGTGA---  
CCGTTTCAGGCTGGACATAAGGAAGAACTTCTTTACTGTCCGAGCCCCCAAGGTTTGGAAATAGACTGCCG  
CCGGAGGTGGTTCAAGCACCTACTTTGAACG-  
CCTTCAAGAGACATTTGGATGTTTATCTTGCTGGGATCCTATGATTCCTGCCCTTGGG--GC-----  
AGGGGGCTGGA-CTCGATGATCTTCCGAGGTCCCTTCCAGC--CCT--A

>CR1-2\_CPB

GCAGCAGTTCTGCAGAAAAGGACCT-  
AGGGGTTACAGTGGACGAGAAGCTGGATATGAGTCAACAGTGTGCCCTTGTTGCCAAGAAGGCTAACGGC  
ATTTTGGGCTGTATAAGTAGGGGCATTGCCAGCAGATCGAGGGACGTGATCGTTCCCCTCTATTTCGACATT  
GGTGAGGCCTCATCTGGAGTACTGTGTCCAGTTTTGGGGCCCCACA--  
CTACAAGAAGGATGTGGAAAAATTGGAAAGAGTCCAGCGGAGGGGCAAC--  
AAAAATGATTAGGGGGCTGGAGCACATGACTTATGAGGAGAGGCTGAGGGAACTGGGATTGTTTAGTCTG  
CAGAAGAG--AGAATGAGGGGGGAT-----TTGATAGCTGCTTTCAACTACCTGAAAGGG---  
GGTTCCAAAGAGGATGGATCTAGACTGTTCTCAGTGGTACCAGATGACAGAACAAGGAG-  
TAATGGTCTCAAGTTGCAGTGGGG---  
GAGGTTTAGGTTGGATATTAGGAAAAACTTTTTCACTAGGAGGGTGGTGAAGCACTGGAATGGGTTACCT  
AGGGAGGTGGTGAATCTCCTTCCCTTAGAGG-  
TTTTTAAGGTCAGGCTTGACAAAGCCCTGGCTGGGATGATTTAGGGTCCTGCTT-TGAG--CA-----GGGGG-  
TTGGA-CTAGATGACCTCCTGAGGTCCCTTCCAAC--CCTGAT

>CR1-2\_Crp

TCAGTACGGAGGCGGAAAAGGATCT-  
TGGAGTCATCATTGACTCCAAGATGAACATGGGCCGGCAGTGTGGGGATGCAGTCAGGAAGGCCAACCG  
CACCTTGTGCATGCATCCACAGATGCATCTCGAGCAGGTCCAAGGAGGTGATCCTCCCCCTCTATGCGGCAC  
TGGTCAGGCCGACGCTGGAGTACTGCGTCCAGTTCTGGGGCGCCGCA--  
CTTCAAGAGGGATGTGGACAACATGGAGAGGGTCCAGAGGAGGGCCAC--  
TCGCATGATCAGGGGGCAGCAGGGCAGGCCCTACGAGGAGAGGCTACGGGACCTGAACCTGTTACGCCCT  
CCACAAGAG--AAGGCTGAGGGGGGAT-----CTAGTGGCCTGTTACAAACTAGTCAGGGGG---  
GACCAGCAGGCACTGGGGGAGTCCCTGTTCCCCCGAGCACTGCCAGGAGTGACCAGGAATAACGGTCA  
CAAGCTGGCAGAGGG---  
TAGATTCAGATTAGACATCAGGAGGCGCTACTTCACTGTCAGGGCGGCTAGGATCTGGAACCAACTTCCA  
AGCGAAGTGGTGTGGCTCCTACCCTGGGGG-  
TCTTTAAGAGGAGGCTTGACGAWCACCTTGCTGGGGTTCGTTTGATTTCCCTGCC--ATGG--CA-----GGGGG-  
TCGGA-CTTGATGATCTGCTCAGGTCCCTTCCGAC--CCT-A-

>CR1-2\_XT

GCAAATCCATAATGGAGAAGGACCT-  
TGGAGTCCTTGTAGATAATAAACTTGGCTGTAGCAAGCAATGCCAGGCAGCAGCTGCAAGGGCAAACAA  
GGTTTTGAGCTGTATTAAGGGGTATAGATTCACGGGAGGAGGGGGTTATTCTTCCCCTTTACAGAGCG  
CTGGTAAGGCCCATCTAGAATATGCTGTTTCAAGTTTTGGTCTCCAGT--  
GCTCAAACGGGACATTATTGAGTTAGAGAGGGTCCAGAGAAGGGCAAC--  
TAAGCTGGTAAAGGGTATGGAAAGTCTCAGTTATGAAGAAAGACTGGCCAAGTTGGGTCTGTTTACACTG  
GAGAAGAG--GCGCTTAAGAGGTGAC-----ATGATAACTATGTATAAATATATAAGGGGA---

TCATATAATAACCTTTCTAATGTTTTATTTACCAGTAGGTCCTTCCAACGGACACGAGG-  
GCACCCACTCCGTTTGAAGAAGG---  
GAGGTTCCATTTAAATATTCGGAAAGGATTTTTTACNGTGAGAGCTGTGAAGTTGTGGAATTCCCTCCCCG  
AATCAGTCGTGCTGGCTGATACATTATATA-  
ACTTTAAGAAGGGGCTGGATGGATTCTTATTTGCCTTCCTCTGGCAGGTTATATATAGG--CA-T---TATGG-  
TTGAA-CTTGATGGAC--GTATGTCTTTTTTCAAC--CCAA--

>CR1-3\_Croc

ATGGCAGCACTATGGAAAAGGACTT-  
GGGAGTCTTGGTAGATCACAGACTCAATATGAGTCTGCAGTGTGATGCAGCTGCACAAAAGGTGAATGCG  
GTTTTGGGATGCATCAATAGAAGCATTAGGTGCAAGACACGGGAGGTGATAGTGCCTCTCTACTCGGCAC  
TGGTTAGGCCTCATCTGGAGTACTGTGTGCAGTTCTGGGCTCCACA--  
TTTTAAAAGGACGTGGAGAAGTTAGAGAGGGTCCAGAGGCAGGCAAC--  
AAAGATGATMAAGGGCTTGGAAAGGCAAGTCATATGAGGAGAGGCTGAAGGAGCTAGGCATGTTTCAGCTT  
GCGGAAAAG--GCGCTTAAGAGGGGAC-----ATGATAGCAGTCTTCAAATACTTGAAGGGC---  
TGCCATAAAGAAGAGGGAAAGCACCTTTTCTCTCTTGGCTGCAGAGAGGAGGATGTGGAC-  
CAATGGCTTGAAGTTGCAGCAAAG---  
TAAGTTTAGATTGGATATCCAGAAAACTTCTTCACTGTTAGAACAGTGAGGCAGTGGAAATAGACTGCCT  
AGGGAAGTTGTGGACTCTCCATCACTGGAGG-  
TGTTCAAGAAGAGGTTGGACAGCCACTGGTCAGGGATGATCTAGGATCCTGCCT-CAGG--CA----GGGGG-  
TTGGA-CTAGATGACCTCTGGAGGTCCCTTCCAGC--CCTACT

>CR1-3\_Gav

CTAGCACCATGACCGAAAGAGACTT-  
GGGGGTCTTGACTGACCACAAGATGAACATGAGCCCCAATGCAATGCTGTGGCCAGCAGAGCAAACCA  
AACTCTGGCATGCATCCACCGATGCATCTCAAGCAAACCAGGGATGTCATCCTCCTGCTTTACTCGGCCT  
TAGTGAGGCCGCAGCTGGAGTACTGCATCCAGTTTTGGGCCCCCA--  
CTTCAGGAGGGATGTGGATAAGCTCGAGAGAGTCCAGAGGAGAGCCAC--  
CCGTATGATCAAAGGCCAAGAGAGCAAGCCTTACGAGGAGAGGCTGAGGGACATGGGACTCTTCAGCCT  
GGTGAAGAG--AAGGCTCAGGGGGGAC-----TTGGTGGCTGCCTATAAGTATATAAGGGGG---  
GTGCATCAGGATCTGGGAGAACASTTGTTCACCAGGGCTCCCAAGGGATAACTAGGTC-  
TAATGGCCACAACTTCTAGAAGG---  
CCAATTCAGACTCGATATAAGGAAAACTTCTTTACAGTCCAAGTGTCCAAGGTCTGGAACAGACTCCCC  
CCAGAGGTGGTGAAGCACCTACTCTGGACT-  
CATTCAAAGGCATTTGGATGTTTATCTTGGCTGGGATCATTTGACTTCCCTGCCT-CTGG--CA----  
GGGGGGCTGGA-CTCGATGATCTCACAAGGTCCCTTCCAGC--CCC-TA

>CR1-4B\_CPB

AAGTAACGGAAGAGGAGAAGGACCT-  
AGGGGTCTTGGTAGACCGCAGGATGACTATGAGTCGACAATGTGACGTGGCGGTGAAAAAAGCCAATGC  
GGTCTTGGGATGCATTAGGCGAGGKATATCTAGTAGGGATAAGGAGGTSCTGCTTCCGTTGTACAAGGCG  
CTGGTGAGACWCATTTGGAGTACTGTGTGCAGTTCTGGTCTCCCAT--  
GTTTAAAAAAGATGAACTCAAACCTGGAACGGGTGCAG-----  
-----  
-----  
-----

>CR1-4C\_CPB

AAGTAACGGAGGAGGAGAAGGACCT-  
CGGAGTCTTGGTTGACCGCAGGATGACTATGAGTCGGCAATGTGACGTGGCCGTGAAAAAAGCTAATGCG  
GTCTTGGGATGCATTAGGCGAGGTATNTCTAGTAGGGATAAGGAGGTGCTGCTTCCGTTATAACAAGGCAC  
TGGTGAGACCTCATTGGAGTACTGTGTGCAGTTCTGGTCTCCCAT--  
GTTTAAAAAAGGATGAANTCAAACCTGGAACGGGTACAGAGAAGGGCCAC--  
TAGGATGATCNGAGGAATGGAAAACCTGTCGTATGAAAGGAGACTCGAGGAGCTCGGTTTGTTTACCCTA  
ACCAAAG--AAGGCTGAGGGGGGAT-----ATGATTGCTCTCTTTAAATATATCAGAGGG---  
ATAAATACCAGGGAGGGAGAGGAATTATTCAGCTCAGTACTAATGTGGACACGAGAAC-  
GAATGGATATAAACTGGCCGTNGG---

GAAGTTTtaggcttgaaattagacgaaggtttctaaccgtcagaggggtgaagttttggaacagccttccg  
agggaaacagtgggggcgaaagacctctctg-  
gctttaagattaagctngataagtttatggaggggatggtttgatggcccgcat-catg--cg-----ggagg-  
tcaga-ctagatgatc-ataatgggcccttctgac--ctta--

>CR1-4\_CPB

AAGTAACAGAGGAGGAGAAGGACCT-  
CGGAGTATTGGTTGATCACAGGATGACTATGAGCCGCAATGTGATATGGCTGTGAAAAAAGCTAATGCG  
GTCTTGGGATGCATCAGGCGAGGTATTTCCAGTAGAGATAAGGAGGTGTTAGTACCGTTATAACAAGGCAC  
TGGTGAGACCTCATCTGGAATATTGTGCGCAGTTCTGGTCTCCCAT--  
GTTTAAGAAGGATGAATTCAAACTGGAACAGGTACAGAGAAGGGCTAC--  
TAGGATGATCCAAGGAATGGAAAACCTGTCTTATGAAAGGAGACTCAAAGAGCTTGGCTTGTTTAGCCTA  
ACAAAAG--AAGGCTGAGGGGAGAT-----ATGATTGCTCTCTATAAATATATCAGAGGG---  
ATAAATACCAGGGAGGGAGAGGAATTATTTAAGCTCAGTATCATTGTGGACACAAGAAC-  
AATGGATATAAACTGGCCATCAG---  
GAAGTTTtagacttgaaattagatgaaggtttctaaccatcagaggagtgaagttctggaatagccttcca  
aggggagcagtgaggcAAAAGACATATCTG-  
GCTTCAAGACTAAGCTTGATAAGTTTATGGAGGGGATGGTATGATGGCCTGCGT-TGTG--CA-----GGAGG-  
TCAGA-CTAGATGATC-ATAATGGGCCCTTCTGAC--CTTA--

>CR1-4\_Croc

CTAGCACCACGACCGAAAGAGACTT-  
GGGGGTCATGATTGACCACAAGATGAACATGAGCCACCAATGCGATGCCGCAGCCGGCAAAGCAAATAA  
AACTCTGGCTTGCATCTACCGATGCATCTCAAGCAAGACCCAAGAAGTCATCCTCCCGCTTACTCGGCCT  
TGGTGAGGCCGCAGCTGGAGTACTGCATCCAGTTCTGGGCTCCGCA--  
CTTTAGAAAGGATGTGGAGAAGCTTGAGAGAGTCCAGAGGAGAGCCAC--  
GCGCATGATTAGAGGTCAAGAGAACAGGCCTTATGAGGAGAGGCTGAGAGGCATGGGACTCTTCAGCCT  
GGAGAAGCG--AAGGCTCAGGGGTGAC-----TTGGTGGCAGCCTATAAGTATATAAGGGGT---  
GTGCATCAGGAAGTGGGAGAACGTCTGTTACCAAGGGCACCCCAAGGGAAGACAAGGTC-  
TAACGGTCACAACTGCTGGAAGA---  
CCGTTTTAGACTGGACATAAGGAAAAACTTCTTTACCGTCCGAGTCTCCAGAGTCTGGAATAGACTCCCC  
CAGAAGTGGTGCAAGCACCTACTCTGGACA-  
CCTTTAAGAAACGCTTGGATGCTTATCTTGCTGGGGTCATCTGATTCCCTGCCCC-TTGG--GC-----  
AGGGGGCTGGA-CCCGATGATCTCGCGAGGTCCCTTCCAGC--CCT--A

>CR1-5B\_Ami

CTAGCACCACATCTGAACGAGACCT-  
GGGTGTCGTGATAGACAACAAAATGAACATGAGCCACCAATGCGATGCCGTAGCTGGCAGAGCTAATCA  
AACTGGCATGCATCTACCGAGGCATCTCGAGCAAGGCTAAGGATGTCATCCTCCCTCTCTACTCGGCCT  
TGGTGAGACCGCAGCTGGAGTACTGCATCCAGTTCTGGGCGCCGCA--  
CTTCAGGAAGGATGTGGAGAAGCTCGAGAGAGTCCAAAGGAGGGCCAC--  
GCGCATGATTAGAGGCCTAGAGACCAGGTCATATGAGGAGAGGCTGAAAGACTTGGGACTGTTTCAGCCTG  
GAGAAGAG--AAGACTCAGAGGGGAC-----TTGGTGGCAGCCTATAAGTATATCAAGGGC---  
GTACATCAGGGCCTGGGGGAGCATCTGTTACCAAGGCCCCCCAGGGGAGGACAAGAAA-  
TAATGGGCACAAGCTGATTGAGGA---  
TCGCTTCAGGCTAGACATAAGGAAAAACTTCTTTACAAGTCGAGTGCCGAGGGTTTGAACAGGCTCCCC  
CCAGAGGTGGTACAGTCACCCACCCTGGCGA-  
TCTTCAAAAAGCGTCTTGACGCCCATCTTGCTGGGGTCATCTGATTTCCTGCCCCAAGTG--CA-----  
GGGGGGCTGGA-CCCGATGATCT-GTAAGGTCCCTTCCAGC--CCC-TA

>CR1-5B\_Crp

AGAGCACGGAGGCAGAAAGGGATCT-  
TGGAGTCATTATTGACTCCAAGATGAACATGGGCCGACAATGCGAGGTCACGGTTGGCAGGGCTAACCGG  
ACCTTGTCGTGCATCCACAGGTGCATCTCAAGTAGGGCCAAGGAGGTGATCCTCCCCCTCTACGCGACGCT  
GGTCAGGCCGCAGCTGGAGTACTGCGTCCAGTTCTGTGCGCCCCA--  
CTTCAGGAGGGATGTGGACAACATTGAGAGGGTCCAGAGGAGGGCCAC--  
CCGCATGATCCGGGGACAACAGGGCAGACCCTACAATGAGAGACTGCGGGACCTGAACCTGTTTCAGCCTT  
CACAAGAG--AAGGCTGAGGGGGGAC-----CTGGTGACCGTCTATAAACTCACTAGGGGG---

GACCAGAAGGGTTTGGGAGAGACCTTGTTTCCCCTAGCGCCCCCTGGCATAACAAGGAA-  
TAACGGCCACAAGTTGTTGGAGAG---  
TAGGTTTAGATTAGACATCCGTAAGAACTACTTCACAGTCAGGGCGGCTAGGATCTGGAACCAACTTCCA  
AGGGAAGTGGTGTCTGGCTCCTACCCTGGGGG-  
TCTTTAAGAGGAGGCTTGATGCCTACCTGGCTGGAGTCATTTGATCTCCTGCCC-A-GG--CA-----GGGGG-  
TCGGA-CTTGAAGATCTACA-AGGTCCTTCCGAC--CCT-A-  
>CR1-5\_AMi  
CTAGCACCATGACCGAAAGAGACTT-  
GGGGGTCTTGATTGACCACAAGATGAATATGAGCCACCAATGCGATGCTGTGGCTGGCAAAGCAAACCAA  
ACTCTGGCGTGCATCCACCGATGCATCTCAAGCAAACCAGGGATGTCATCCTCCCGCTTTACTCGGCCCT  
GGTGAGGCCGACAGCTGGAGTACTGCGTCCAGTTTTGGGCCCCCA--  
CTTCAGGAGGGATGTGGAAAAGCTTGAGAGAGTCCAGAGGAGAGCCAC--  
TCGTATGATCCAAGGCCTGGAGGGCAGGCCGTACGAGGAGAGGCTGAGGGACTTGGGACTCTTCAGTCTG  
GAAAAGAG--AAGGCTCAGGGGGGAC-----TTGGTAGCAGCCTACAATTATATAAGAGGG---  
GTACATCAGGACCTGGGAGAACAGCTGTTACCAGAGCTCCCCAAGGGATAACAAGGTC-  
TAACGGCCATAAACTCCAGGAAG---  
CCGATTTAGACTAGACATAAGAAAAAAGTTCTTTACGGTGCGAGTGTCCAGGGTCTGGAACAGACTCCCC  
CCAGAGGTGGTGCAAGCACCTACTCTGGACT-  
CTTTCAAAAAACATCTGGATATTTTTCTTGCTGGGGTCACTTGACTTCCCGCCT-ATGG--CG-----  
GGGGGGCTGGA-CTCGATGATCTCACGAGGTCCCTTCCAGC--CCC-TA  
>CR1-5\_CPB  
GCAGCAGCACTGCTGAGAAGGATCT-  
GGGAGTTGTGGTGGATCACAACCTCAACATGAGTCAGCAATGCGATGCTGTTGCAAAAAAAGCAAATGCA  
ATTTTAGGTTGCATTAACAGAGGCATAGCATGCAAGTCATGGGAGGTGATAGTACTGCTCTACTCGGTGCT  
GGTTAGGCCTCAGCTGGAGTACTGTGTCCAATTTTGGTCCCAAT--  
GTATAGAAAGGATGTAGAGAACTGGAAAGGATCCAGAGGCGAGCGAC--  
AAAGATGATCAAAGGGATGGAATGCAAGCCATATGAGCAAAGGCTGAAGGAACTGGGTATGTTTAGTTT  
GGAAAAGAG--GAGATTAAGGGGGGAC-----ATGATAGCGGTCTTCAGATACTTGAAAGGC---  
TGCCATAAAAAAGATGGAGAAAAGTTGTTCTCTTTTGCCACAGAGGGCAGGACAAGAGG-  
CAATGGGTCAAACCTACAGCATAG---  
CAGATTTAGATTAATCTCAGGAAAAACTTCTTAAGTGAAGAACAGTAGGACAATGGAACAGACTGCCT  
MGGGAGGTTGTGGAAGCTTCTTCACTGGAGG-  
TTTTCAAAGGAGGCTGGATAGCCATCTGTCTTGGATGGTTTAGAATCCTGCATCTTGG--CA-----GGGGG-  
TTAGA-CTAGATGACC-CTTGCGGTCCCTTCTAAC--CCTATG  
>CR1-5\_Croc  
AAAGCACGGTGGCAGAAAGAGATCT-  
TGGAGTCATTATTGACTCCAAGATGAACATGGGCCGACAATGCGAGGACACGGTCAGTAGGGCTAACCGT  
ACTTGTCTGCATCCACAGATGCATCACAAGCAGGGCCAAGGAGGTGATCCTCCCCCTCTATGCGACAC  
TGGTCAGGCCGACAGCTGGAGTACTGCGTCCAGTTCTGGGCGCCGCA--  
CTTCAGGAGGGATGTGGACAGCATTGAGAGGGTCCAGAGGAGGGCCAC--  
TCGCATGATCCGGGGACAGCAGGGCAGACCCTACGAGGAGAGGCTACGGGACCTTAACCTGTTCAGCCTT  
CACAAGAG--AAGGCTGAGGGGGGAC-----CTGGTGGCCATCTATAAACTTACTAGGGGG---  
GACCAGCAGGGTTTGGGAGAGACCTTGTTCCCCCGAGCGCTCCCGGAGTAACAAGGAA-  
TAACGGCCATAAGTTGCTAGAGAG---  
TAGGTTTAGACTAGACATTAGAAGGCACTACTTCACAGTCAGGGCGGCTAGGATCTGGAACCAACTTCCA  
AGGGAAGTGGTGTGATGGCTCCTACCCTGGGGG-  
TCTTTAAGAGGAGGCTTGACGTTTACCTGGCTGGGGTCACTTTGATCTCCTGCCC-AGGG--CA-----GGGGG-  
TCGGA-CTAGAAGATCTACA-AGGTCCTTCCGAC--CCT-A-  
>CR1-6C\_AMi  
AAAGCACAGTGGCAGAAAGAGATCT-  
TGGAGTCATTATCGATTCCAAGATGAACATGGGCCGCAATGTGAGGACACGGTCAGTAGGGCTAACCGC  
ACTTGTGCATGCATCCACAGATGCATCACAAGCAGGGCCAAGGAGGTGATCCTCCCCCTCTATGCGACAC  
TGGTCAGGCCGACAGTTGGAGTACTGCGTCCAGTTCTGGGCGCCGCA--  
CTTCAGGAGGGATGTGGACAGCATCGAGAGGGTCCAAAGGAGGGCCAC--

TCGCATGATCCGGGGACAGCAGGGCAGACCCTACGAGGAGAGGCTACGGGACCTGAACCTGTTCAGCCTT  
CACAAGAG--AAGGCTGAGAGGGGAC-----CTGGTGGCCATCTATAAACTTACCAGGGGG---  
GACCAGCGGGGAATGGGAGAGACCCTGTTCCCCCGAGCACCTCCCGGAGTAACAAGGAA-  
TAACGGCCATAAGTTGTTAGAGAG---  
TAGGTTCAGGCTAGACATTAGAAGGCACTACTTCACAGTCAGGGCGGCTAGGATCTGGAACCAACTTCCA  
AGGGAAGTGGTGTCTGGCTCCTACCTTGGGGG-  
TCTTTAAGAGGAGGCTTGATGATTACCTAGCTGGGGTTCATWTGATCTCCTGCC-AGGG--CA-----GGGGG-  
TCGGA-CTTGAAGATCTGCT-AGGTCCCTTCCGAC--CCT-A-

>CR1-6D\_AMi

AAAGCACGGTGGCAGAAAGGGATCT-  
TGGAGTCATTATCGACTCCAAGATGAACATGGGCCGACAATGCAAGGACACGGTCAGTAGGGCTAACCGC  
ACCTTGTCGTGCATCCACAGATGCATCACAAGCAGGGCCAAGGAGGTGATCCTCCCCCTCTATGCGACAC  
TGGTCAGGCCACAGCTGGAGTACTGTGTCCAGTTCTGGGCACCGCA--  
CTTCAGGAGGGATGTGGACAGCATTGAGAGGGTCCAGAGGAGGGCCAC--  
CCGCATGATCCGGGGACAGCAGGGCAGACCCTATGAGGAGAGGCTATGGGACCTKAACCTGTTCAGCCTT  
CACAAGAG--AAGGCTGAGGGGGGAC-----CTGGTGGCCATCTATAAACTTACTAGGGGG---  
GACCAGTGGGGTWTGGGAGAGACCCTGTTCCCCCGAGCGCCTCCCGGAATAACAAGGAA-  
TAATGGCCATAAGTTGTTAGAGAG---  
TAGGTTCAGACTAGACATTAGAAGGCACTACTTCACAGCCAGGGCGGCTAGGATCTGGAACCAACTTCCA  
AGGGAAGTGGTGTCTGGCTCCTACCTTGGGGG-  
TCTTTAAGAGGAGGCTTGATGATTACCTGGCTGGGGTTCATTTGATCTCCTGCC-AGGG--CA-----GGGGG-  
TCGGA-CTWGAAGATCTGCA-AGGTCCCTTCCGAC--CCT-A-

>CR1-6F\_AMi

WGAGCACAGAGGCGGAAAGGGATCT-  
TGGAGTCATTATTGACTCCAAGATGAACATGAGCCGCAATGCCAGACCGCAGCCAGCAAAGCCAACCAC  
ACCTTGTCGTGCATCCAAAGATGCATCTCAAGCCAGTCCAGAGAGGTGATACTCCCCCTCTACGCGACATT  
GGTCCGGCCACAATTGGAGTACTGTGTCCAGTTCTGGGCACCGCA--  
CTTTAAGAAGGATGTGGCCTGCCTTGAGAGGGTTCAGAGGAGGGCCAC--  
CCGCTTGGTTGGAGGGCAACAGGGCAGGCCCTATGAGGAGAGGCTGAGGGACCTGAACCTGTTCAGCCTC  
AGCAAGCG--GAGGCTGAGGGGGGACTTGGTGGTTTGGTGGCTGCCTACAACTCGTTAGGGGA---  
GATCAGCAGCAAATAGGAAGGGCCCTATTCCCCCGAGCAGCACCTGGGGTGACGAGGAA-  
CAATGGCCAGAAGCTGCTGGAGAA---  
TAGGTTCAGGTTAGAGATTAGGAGGCACTATTTCACTGTCAGGGTGGCTAGGATCTGGAACCAACTTCTT  
AGGGAAGTGGTCCTCGCTCCTACCTTGGGTA-  
AATTCAAAAAGAGGTTGGATGAACACCTGTCTGGGGTTCGTGTGAGCTCCGGCCA-GTGG--CG-----GGGGG-  
TTAGA-CTAGATGATCTATTAGGTCCTTCTGAC--CCC-TA

>CR1-6\_Croc

TCAGCACAGAGGCAGAAAAGGATCT-  
TGGAGTCATTATTGATTCCAAGATGAACATGGGCCGCAATGTGGGGACGCGGTTCAGGAAGGCTAACCGC  
ACCTTGTCATGCATCCACAGATGCATCACGAGCAGGTCCAAGGAGGTGATCCTCCCCCTCTATGCGACACT  
GGTCAGGCCGAGTTGGAGTACTGCGTCCAGTTCTGGGCGCCGCA--  
CTTCAGGAGGGATGTGGACAGCATCGAGAGGGTCCAGAGGAGGGCCAC--  
TCGCATGATCAGGGGGCAGCAGGGCAGGCCCTACGAGGAGAGGCTACGGGACCTGAACCTGTTCAGCCT  
CCACAAGAG--AAGGCTGAGAGGGGAT-----CTGGTGGCCGTCTATAAACTGGCCAAGGGG---  
GACCAGCAGGCAATGGGAGAGTCCCTGTTCCCCCGAGCACTACCGGGAGTAACAAGGAA-  
TAACGGCCATAAGTTGACTGAGAG---  
TAGATTCAGGCTAGACATCAGGAGGCACTACTTCACAGTCAGGGCGGCTAGGATCTGGAACCAACTTCCA  
AGGGAAGTGGTGTCTCGCTCCTACCTTGGGGG-  
TCTTCAAAAAGGAGGCTAGACGATCACCTAGCCGGGGTTCGTTTGATTTCTCCTGCC-ATGG--CA-----GGGGG-  
TCGGA-CTTGATGATCTGCTCAGGTCCCTTCCGAC--CCT-A-

>CR1-7B\_Gav

TCAGCACGGAGGCGGAAAAGGATCT-  
TGGAGTCATCATTGACTCCAAGATGAACATGGGTTCGGCAGTGTGGGGAGGCAGTTAGGAAGGCCAACCGT  
ACCTTGTCATGCATCCACAGATGCATCTCGAGCAGGTCCAAGAGAGGTGATCCTCCCCCTCTATGCGGCACT



GGTCAGGCCCGCAGTTGGAGTACTGCGTCCAGTTCTGGGCGCCGCA--  
CTTCAAGAGGGATGTGGACAGCATGGAGAGGGTCCAGAGGAGGGCCAC--  
TCGCATGATCAGGGGACTGCAGGGCAGGCCCTATGAGGAGAGGCTACGGGACCTGAACCTGTTTCAGCCTC  
CAAAAGAG--AAGGCTGAGGGGGGAT-----CTTGTGGCCTGTTACAAACTGGTCAGGGGG--  
GATCAGCAGGCATTGGGGGAGTCACTGTTCCCCCGAGCACAGCCAGGAGTGACCAGGAA-  
CAACGGTCACAAGCTGGCAGAGGG---  
TAGGTTTAGGTTAGACATCAGGAGGCGCTATTTACAGGTCAGGGCGGCTAGGGTCTGGAACCAACTTCCA  
AGGGAGGTGGTGCAGGCTCCTACCCTGGGGG-  
TTTTTAAGAGGAGGTTAGATGAACACCTTGCTGGGGTTCGTTTGATTTCCTGCC--ATGG--CA-----GGGGG-  
TCGGA-CTAGATGATCTGCTCAGGTCCCTTCCGAC--CCT-A-

>CR1-7\_CPB

AAAGCAGTGAAGCTCTGAAAAGGATTT-  
AGGGTCAGTAGTGGACAAGCAACTCAACATGAGCTCCCAGTGCGATGCTGTGGCAAAAAGGGCTAATGT  
GATCCTTGGATGTATAAACAGGGGAATAGTA---  
ATGAGTAGGGAGGTGATTTTACCTCTATGTATGGCATTGGTGAGACCAGTACTGGAATACTGCGTMCAGT  
TCTGGTGTCCATA--TTTTAAAAGGATGTTGAAAAATTGGAGAGGGTGCAGAAAAGAGCCAC--  
AAAAATGATTTAAGGGCTGGAGAAAATGCCTTA-----  
GGGGACTTAAAGAGCTCAATCTGTTTAGTTTATCAGAAAG--AAGATTGAGAGGTGAC-----  
TTGATTACAGTGTA-AAGTACCTTCACAGG---  
GAGAAAATACGGGGTACTAAAGGGCTCTTTAATCTAGCAGAGAAAGGCATAACAAGAAC-  
CAATGGCTGGAAGCTGAAGCCAGA---  
CAAATTCAAATTAGAAATTAGGCACACATTTTTAACAGTGAGGGTGATTAACCACTGGAACAAACTACCA  
AGGGAAGTGGTGGATTCTCCATCTCTTGAAG-  
TCTTCAGATCAAGACTGGATGCCTTTCTGGAAGATATGCTTTAGTGGCCTGTGA-TACA--CA-----GGAGG-  
TCAGA-CTAGATGATC--TAATGGT-TCTTCTGGC--CTTA--

>CR1-7\_Croc

GCGGCACGGAAGCGGAAAGGGATCT-  
CGGAGTCCTAGTGGACTCCAAGATGAACATGAGTCGTCAGTGTGACGAAGTCATCAGCAAAGCTAACTGC  
ACTTTATCGTGCATCAGCAGATGCATGACAAACAGAACCAAGGAGGTGATACTTCCCCTCTATCGGGCGC  
TGGTCAGACCGCAGTTGGAATACTGCGTSCAGTTTTGGGCGCCACA--  
CTTCAAGAGGGATGTGGATAACCTGGAGAGGGTCCAGAGAAGGGCCAC--  
TCGTATGGTTAAGGGCTTGCAGGCCAAGCCCTACGAGGAGAGACTAGGGCACCTGGACCTTTCAGCCTC  
CGCAAGAG--AAGGTTGAGAGGCGAC-----CTTGTGGCTGCCTATAAATTCATCATGGGG---  
GCGCAGAAGGGAATTGGTGAGGCTCTACTCACCAAGGCGCCCCTGGGGGTCACAAGAAA-  
TAATGGCCATAAGCTAGCAGAGAG---  
CAGATTTAGACTGGACATTAGGAAGAACTTCTTCACAGTTAGAGTGGCCAAAATCTGGAATGGGCTCCCA  
AGGGAGGTGGTGTCTCTCCCCTACCCTGGGGG-  
TCTTCAAGAGGAGGTTAGATAGGCATCTGGCTGGGGTTCATCTGATTTCTGCT--A-TG--CA-----GGGGG-  
TCGGA-CTCGATGATCTATTGAGGTCCCTTCCGAC--CCT-A-

>CR1-7\_Crp

CCAGCACGGAGACGGAAAGGGATCT-  
TGGAGTCGTCATTGACTCCACGATGAACATGGGCCGGCAGTGTGGGGAGGCAGTCAAGAAGGCCAACCG  
TACCCTGTCATGCATCCACAGATGCATCTCGAGCAGGTCCAGGGAGGTGATCCTCCCCCTCTATGCGGCAC  
TGGTCAGGCCGACAGTGGAGTACTGCGTCCAGTTCTGGGCGCCACA--  
CTTCAAGAGGGACGTGGACGATATGGAAAGAGTCCAGAGGAGGGCCAC--  
TCGTATGATCAGGGGTCAGCAGGGCAGGCCTTATGAGGAGAGGCTACGGGACCTGAACCTGTTTAGCCTC  
CACAAGAG--AAGGTTAAGGGGGGAC-----CTTGTGGCCTGCTACAAACTGGTCAGGGGG---  
GATCAGCAGGTATTGGGGGAGTCCCTGTTCCCCCGTGCCTGCCAGGAGTGACCAGGAA-  
TAACGGTCACAAGCTGGCGGAGGG---  
TAGGTTTAGATTAGATATTAGGAGGCGCTACTTCACAGTCAGGGCGGCTAGGGCCTGGAACCGGCTTCCA  
GGGGAAGTGGTGCAGGCTCCTAGCCTGGGGA-  
TTTTTAAAAGGAAGTTAGATGAGCACCTTGCCGGGGTTCATCTGATTTCTGCT--AAGG--CA-----GGGGG-  
TCGGA-CTAGATGATCTACCTAGGTCCCTTCCGAC--TCT-A-

>CR1-7\_Gav

TCAGCACGGAGGTGGAAAAGGATCT-  
GGGAGTCATTATTGACTCCAAGATGAACATGAGTCGGCAATGTGGGGAGGCGGCTAGGAAGGCCAACTG  
CACCTTGTTCGTGCATCCACAGATGCATCTCGAGCAGGTCCAAGGAGGTGATCCTCCCCCTCTATGCGGCAC  
TGGTCAGGCCGCAGCTGGAGTACTGCGTCCAGTTCTGGGCGCCGCA--  
CTTTAAGAGGGATGTGGACAGCATCGAGAGGGTCCAGAGGAGGGCCAC--  
TCGTATGATCAAGGGACAGCAGGGTAGGTCTATGAGGAAAGGTTGCGGGACCTGAACCTGTTTCAGCCTT  
CAAAAGAG--AAGGCTGAGGGGGGAT-----CTTGTGGCCTGTTATAAACTGGTTAGGGGG---  
GATCAGCAGGCGCTGGGGGAGTCCCTGTTCCCCCGAGCGCCGCAAGGAGTGACCAGGAA-  
CAATGGTCACAAGCTGGCGGAGGG---  
AAGGTTTAAGTTGGACATCAGGAGGCGCTACTTCACGGTCAGGGCGGCTAGGGTCTGGAACCAGCTTCCA  
AGTGAGGTGGTGCAGGCTCCCACCCTGGGGG-  
TTTTTAAGAGGAGGTTGGATGACCACCTTACTGGGGTCATTTGA-TTCCTGCC--ATGG--CA-----GGGGG-  
TCGGA-CTAGATGATCTGCTCAGGTCCCTTCCGAC--CCT-A-

>CR1-8\_AMi

CCAGCACGATGGCTGAAAGGGACCT-  
CGGGGTTATGGTTGATCACAGGATGAACATGAGCCGCCAGTGCACGCTGTAGTCAACAGAGCTAATAGC  
ATACTGGGATGCATTAGCCGATGCGTCGCGAGCAGGGCTAAGGAAGTGATACTTCCCTCTACTCGGCGC  
TGGTGAGACCCAGCTGGAGTACTGTGTCCAGTTCTGGGCGCCGCA--  
CTTCAAAAAGACGTGGAGAATCTTGAAAGGGTCCAGAGAAGGGCCAC--  
AAGAATGATTAAGGGCCTGGAGGACAAACCTTATGAGGAAAGACTAAGGGATCTGGGACTGTTTCAGCCT  
GGGAAGAG--AAGACTGAGGGGGGAC-----TTGGTGGCCGTCTATAAGTATGTAAGGGGT---  
GAATATCGGGAGCTGGGAGAAAACCTGTTCACTAGGGCGCCCCAGGGGAGGACAAGGAG-  
CAATGGCCATAAACTGTTAGAGGA---  
TGGTTTCAGGTTGGATGTAAGGAAGAACTTCTTTACGGTAAGGGTGACCAGAATCTGGAATAGACTTCCC  
AAGGAGGTGGTGCAGTCCCCAACCTTGGAAG-  
TCTTCAAGAGGAGACTGGACAGACACCTTGCTGGGATCATTGAAATTCCTGCCC-AGAG--CA-----  
GGGGGGTTGGA-CTCGATGATCTTTCGAGGTCCCTTCCAGC--CCT-TA

>CR1-8\_CPB

GAAGCAGTGAAGTCTGAAAAAGATTT-  
GGGGGTCATGGTGGATAATCAGCTGAACATGAGCTCCCAGTGCATGCTGTGGCCAAAAGAGCTAATGCG  
ATCCTGGGATGCATAAACAGGGGAATCTCGAGTAGGAGTAGAGAGGTTATTTTACCTCTGTATTTGGCAC  
TGGTGCACCGCTGCTGGAATACTGTGTCCAGTTCTGGTGTCCACA--  
ATTCAAGAAGGATGTTGATAAATTGGAGAGGGTTCAGAGAAGAGCCAC--  
GAGAATGATTAAGGATTAGAAAACATGCCTTATAGTGATAGACTCAAGGAGCTCAATCTATTTAGCTTA  
ACAAAGAG--AAGGTTAAGGGGTGAC-----TTGATTACAGTCTATAAGTACCTACATGGG---  
GAACAAATATTTAATAAT---GGGCTCTCAGTCTAGCAGAGAAAGGTATAACACGATC-  
CAATGGCTGGAAGTTGAAGCTAGA---  
CAAATTCAGACTGGAAATAAGGTGTACATTTTTTAACGGTGAGAGTAATTAACCATTGGAACAATTTACCA  
A-GGTCGTGGTGGATTCTCCATCACTGACAA-  
TTTTTAAATCAAGATTGGATGTTTTTCTAAAAGATATGCTCTAGTGGCCTGTGT-TATA--CA-----GGAGG-  
TCAGA-CTAGATGATC-ACAATGGTCCCTTCTGGC--CTTG--

>CR1-8\_Gav

GTAGCACAACTGCGGAAAGGGATCT-  
CGGAGTCGTAGTCGACTCCAAAATGAACATGAGTCACCAGTGTGATGAGGTAATAAGTAAAGCTAACCGC  
ACCCTTTCTTGCATAAGTAGGTGCATCGCAAACAGGTCTAGGGAGGTGATACTTCCCCTCTATGCGGCATT  
GGTCAGGCCGCAGCTGGAGTACTGCGTCCAGTTTTTGGGCGCCGCA--  
CTTCGGGAGGGATGTGGATGGCCTGGAGAGGGTTCAGAGGAGGGCCAC--  
TCGTCTGGTTAAAGGCCTACAGAAAAAACCTATGTGGACCGATTGGGAGACCTGAACCTCTTCAGCCTC  
CGCAAGAG--GAGGCTGAGAGGTGAT-----CTCGTGGCCGCCTACAACTCATC-GGGGG---  
GGCAGCAAGAAATAGGGGATACAATGTTTACCAGGGCGCCCGTCGGGGTAACTAGAAA-  
TAATGGCCACAACTGGAAGAGAG---  
CAAATTCAGATTGGACATCAGGAAAAAATTCTTTACAGTGAGGGTTGCCAAAATATGGAATAAGCTTCCA  
AGGGAGGTGGTGTCTGTCCCCTTCCCTGGAGG-  
TGTTTAAAAGGAGATTGGACAGACACCTGGCTGGGGTCATCTGAATTCCTGCCC-AGGG--CA-----GGGGG-

TCGGA-CTCGATGATCTAAT-AGGTCCTTCCGAC--CCT-A-

>CR1-9B\_AMi

GCAGCTCAGAGGCTGAGAGAGATCT-  
TGGAGTCATAGTTGACTCCAAGATGAACATGAGCCGGCAGTGTAACGAGGCCATCAACAAGGCCAATCGC  
ACCTTGTCGTGTATTAGCAGATGCATGACCAACAGATCGAGGGAGGTGATGCTCCCCCTCTATGCGGCATT  
GGTCAGGCCCGCAGTTGGAGTACTGTGTCCAGTTTTGGGGCGCCGCA--  
CTTCAAGAGGGACACGGAGAATCTGGAGAGGGTTCAGAGGAGGGCCAC--  
TCGCATGATTAGTGGCCTCCGTGAAAGACCCTACGAGGGGAGGTTGAGAGATCTGGATCTCTTCAGCCTT  
CACAAGAG--ACGTCTGAGGGGAGAC-----CTTGTAGCCGCCTATAAGTTTATCAAGGGA---  
GGACAACAGGGAATTGG-GATGCGCTATTTACCAGAGCGCCCCAGGGAGTAACTAGGAA-  
TAATGGGTGCAAAGTACTAGTGGAGAG---  
TAGATTTAGGTTAGACATTAGGAAGAAATTTTTTACAGTAAGGGTGGCCAGAATCTGGAATGGGCTTCCA  
AGAGAGGTGGTGCTATCACCTAACTTGGAGG-  
TCTTCAAGAGGAGGCTTGATAGTCACCTGGCTGGGGTTCATCTGATTTCTGCCA-GGGG--CA-----GGGGG-  
TCGGA-CACGATGATCCATTGTGGTCCCTTCCGAC--TCT-A-

>CR1-9C\_AMi

GCACCACAACAGTGGAAAGAGATCT-  
CGGAGTCCTGGTTGACGCAAAAATGAACATGAGTCGCCAGTGTGACGAGGTAATAAGCAAGGCTAACTG  
CACTCTTTCTTGCATCAGCAGGWCATCACGAGCAGGTCTAGGGAAGTGATAATCCCCTCTATGCAGCA  
CTGGTGAGGCCGCAGATGGAGTACTGCGTCCAGTTTTGGGGCGCCGCA--  
CTTCAAGAGGGATGTGGATAACCTTGAGAGGGTTCAGAGGAGGGCTAC--  
TCGTATGGTTGAGGGCCTGCAGGTAAGACCCTATGAAGACAGACTGAGGGACCTGAATCTCTTCAGCCTC  
CGCAAGAG--AAGGCTGAGAGGTGAT-----CTTGTGGCTGCCTACAACTCATCAGGGGG---  
GGCCAGCAGGGAATAGGGGACACTCTGTTTACCAGGGCGCCCCCTCGGGGTACCAGAAA-  
TAATGGCCACAACTGAAGGAGAA---  
CAGATTTAGATTGGACATAAGGAAGAAATCTTTACGGTGAGGGTTGCCAAAATATGGAATGGGCTTCCA  
AGGGAGGTGGTGCTTTCCCCTACCCTGGAGG-  
TGTTCAAGAGGAGATTAGACAGGCATCTGGCTGGGGTACTTAATTTCTGCTT-GGAG--CA-----GGGGG-  
TCGGA-CCCGATGATCTACC-AGGTCCTTCCGAC--TCT-AG

>CR1-9D\_AMi

GCTCCACTGAGGCAGAAAAAGATCT-  
TGGAGTCACTGTTGACTCCAGGATGAACATGAGTCGCCAATGTGATGAAGCAGTTGGCAGAGCCAATCGC  
ACCTTGTCGTGCATCCGTAGGTGCTTACAAACAGGTCCAGGGAAGTGATTCTCCCCCTCTATGCAGCACT  
GGTCAGACCGCAGCTGGAGTACTGTGTCCAGTTCTGGATGCCGCA--  
GTTCAAGCGGGATGCGGACAACCTGGAGAGGGTCCAAAGAAGAGCCAC--  
TCGCCTGATTAGAGGCCTGCAGGGAAGGCCCTATGAGGAAAGGCTAAGGGACCTTAACCTCTTCAGCCTC  
TCCAAGAG--AAGGCTGAGAGGGGAC-----CTTGTGGCGGCGTACAAATTCATAAGGGGA---  
GAGCAACATGAAGTAGGCGACGATCTGTTACCAGGGCACCCCCTGGAATGACAAGGAA-  
CAATGGCCATAAGCTACTAGAGAG---  
AAGGTTTAGGCTGGACATTAGGAGAAAGTTCTTACGGTCAGGGTTGCCAGAATCTGGAATGGGCTCCCA  
AGGGAGGTGGTGCTCGCCCCATCCTTGGGGG-  
TCTTCAAGAGGAGACTGGACAGGCACCTGGCTGGGATCACATGATTGCCTGCCA-GGGG--CA-----  
GGGGG-TCAGA-CTAGATGGCCCACTGAGGTCCCTTCCAAC--TCT-AT

>CR1-9\_AMi

GCAGCACAGCAGCGGAAAGGGATCT-  
CGGAGTCATAGTTGACTCCAAGATGAACATGAGTCGTCAATGTGACGAAGCGATCAGTAAAGCTAACCGC  
ACTTTATCATGCATTAGCAGGTGCATGACGAACAGGTCCAGGGAGGTGATACTTCCCCTCTATGCGGCACT  
GGTCAGGCCCGCAGTTGGAGTACTGCGTCCAGTTTTGGGGCGCCGCA--  
CTTCAAGAGGGATGTGGACAACCTCGAGAGGGTTCAGAGGAGGGCCAC--  
TCGTATGGTTAGGGGCCTGCAGGCAAGGCCCTACGAGGAGAGACTGAGGGACCTGGATCTCTTCAGCCTC  
CGCAAGAG--AAGGCTGAGAGGTGAT-----CTTGTGGCTGCCTACAAATTCATCAGGGGG---  
GGGCAGCAAGGAATAGGAGATGCTCTGTTTACCAGGGCACCCCCTGGAGTAACTAGGAA-  
CAACGGCCACAACTGACGGAGAG---  
CAGATTTAGGTTAGACATCAGGAAGAACTTCTTTACGGTAAGGGTTGCCAGAATCTGGAATGGGCTTCCA

AGGGAGGTGGTGTCTCTCCCCTACCTTGGGGG-  
TCTTTAAGAGGAGGCTGGACATGCACCTGGCTGGGGTTCGTCTGATTTCTGCCC-AGGG--CA-----GGGGG-  
TCGGA-CTCGATGATCTGCTGAGGTCCCTTCCGAC--CCA-A-  
>CR1-9\_CPB  
GTGGTAGTACTGCTGAAAAGGATCT-  
GGGGGTATAGTGGATCACAAATTGAATATGAGTCAACAATGTGATGCAGTTGCGAAAAAGGCTAATATC  
ATTCTGGGGTGTATTAACAGGAGTGTCTGATGTAAGACATGGGAGGTAATTGTCCCGCTCTACTCGGCACT  
GGTGAGGCCTCAGCTGGAGTACTGTGTCCAGTTCTGGGCGCCACA--  
CTTTAGGAAAGATGTGGACAAATTGGAGAGAGTCCAGAGGAGAGCAAC--  
AAAAATGATAAAAGGTTTAGAAAACCTGACCTATGAGGAAAGGTTAAAAAACTGGGCATGTTTAGTCTT  
GAGAAAAG--AAGACTGAGGGGGGAC-----CTGATAACAGTCTTCAAATATGTAAAGGGC---  
TGTTATAAAGAGGACGGTGATCAATTGTTCTCCATGTCCACTGAAGGTAGGACAAGAAG-  
TAATGGGCTTAATCTGCAGCAAGG---  
GAGATTTAGGTTAGATATTAGGAAAAACTTTCTAACTATAAGGGTAGTTAAGCTCTGGAATAGGCTTCCA  
AGGGAGGTTGTGGAATCCCCGTCCTGGAGG-  
TTTTTAAGAACAGGTTGGACAAACACCTGTCAGGGATGGTCTAGGGTCTGCCTCAGCG--CA-----GGGGG-  
CTGGA-CTTGATGACCTCTCAAGGTCCCTTCCAGC--CCTACA

>CR1-9\_Crp  
CCAGCACCATGAATGAAAGGGACCT-  
GGGGGTAATAATAGACCACAGTATGAACATGAGCCGGCAGTGTGATGCTGTAGCCAGCAGGGCAAACAA  
TACCCTGGCATGCATCAATCGATGCATCTCCAGCAAACCAAGGAAGTGATTCTTCCACTCTACTCGGCAT  
TGGTGAGACCACAGCTGGAGTACTGCATCCAGTWCTGGGTGCCGCA--  
CTTCAACAAGGACATGGTAAAGCTTGAGAGAGTCCAGAGAAGGGCCAC--  
CCATATGATCAGAGACTTGCATGGCAAGCCATACGAGGAAAGGCTGAGGGATCTGGGACTCTTCAGCCTG  
AAAAAGAG---AGGCTGAGAGGGGAC-----TTGGTAGCAGCTTACCACTACATCAGGGGA---  
ATACATCAAGGGCTCGGTGAACAACCTGTTACCAGGGCACCTTGGGGAAAACCAGGAG-  
TAATGGCCACAACTCCTGGAAGA---  
CCATTTAGGCTCAACATTAGGAAAACTTCTTACAGTTAGGGTGTCCAGACTGTGGAATAAGCTCCCTC  
CAGAGGTGGTGCAATCGCCTACCCTGGAAA-  
TCTTCAAGAGGAGACTGGACAGTCACCTTGCTGGGGTACCTGATTTCTGCTT-TGTG--CA-----GGGGG-  
CTGGA-CCCGATGATCTTCCAAGGTCCCTTCCAGC--CTT--A

>CR1-B  
NNNNNNNNNNNNNNNNNNNNNNNNNNNNNNNN-  
NNNNNNNNNNNNNNNNNNNNNNNNNNNNNNNNNNNNNNNNNNNNNNNNNNNNNNNNNNNNNNNNNNNNNN  
NNNTCTCCTGGGCTCCATCATGAGAGGGGTGGCCAGCAGGGACCCTTTGGAGATTGTCCCTCTTTACTCTG  
CTCTTGAGAGGCCCTTTAAAAGTACTGTGTCTTGTATGGAGCCACA--  
GTACAAGAAAGACAGAGAGCTGTTGGAGAGGGTCCAGAGGAGGGCCAT--  
GAAGATGATCAGGGGGCTGGAGCACCTCCCCTATGAAGACAGGCTGAAGGAGCTGGTCTTATTCAGCCTG  
GAGAAGAG--AAGGCTGCGGGGTGAC-----CTCATTGCAGCCTTTCAGTACCTGAAGGGA---  
GCCTATAAACAGGAAGGGAGTAACTCTTTGAAAGGGTAGATAACAGCAGGACAAGGGG-  
GAACGGTTTTAAGTTGAAAGAGGG---  
AAGATTTAGGTTGGATGTTAGGGGGAAGTTCTTTACCAGGAGAGTGGTGAGGTGCTGGAATAGGCTGCCC  
TGAGAGGTTGTGGATGCCCCGTCCCTGGAGG-  
TGTTCAAGGCCAGGTTGGATGAGGCCCTGGGCAACCTGGTCTAAGGCCCTGCC---TGG--CT-G---GGGGG-  
TTGGAGATTCATGATC-CTTGAGGTCCCTTCCAAC--CCAGGC

>CR1-B2  
AGAGTAGCCCTGCAGAGAAGGACCT-  
GGGGGTCTTGGTGGATGAAAACTTAACATGAGCCAGCAGTGTGCTCTTGCAGCTCGGAAAGCAAATGGT  
ATCCTGGGCTCCATCAGAAGAGGGGTGGCCAGCAGGGACAGGGAGGTGATTGTCCCTCTCTACTCTGCCC  
TTGTGAGGCCCATCTGGAGTACTGCGTCCAGGTCTGGAGCCCCA--  
GTACAAGAAAGACAGGGAGCTGTTGGAGAGGGTCCAGAGGAGGGCCAC--  
AAAGATGATCAGAGGGCTGGAGCACCTCCCCTACGAAGACAGGCTGAGGGAGCTGGGCTTGTTCAGCCTG  
GAGAAGAG--AAGGCTGCGGGGTGAC-----CTCATTGCAGCCTTTCAGTACCTAAAGGGA---  
GCCTATAAACAGGAGGGGAGTCAACTCTTTGAAAGGGTAGATAACAGCAGGACAAGGGG-

AAATGGTTTTTAAGTTGAAGGAGGG---  
AAGATTTAGGTTGGATGTCAGGGGGAAGTTCTTTACTATGAGAGTGGTGAGGTGCTGGAACAGGCTGCCC  
AGAGAGGTTGTGGATGCCCCGTCCCTGGAGG-  
TGTTCAAGGCCAGGTTGGATGGGGCCCTGGGCAGCCTGGTCTAGGGCCCTGCCT-GTGG--CA-G---  
GGGGG-TTGGAGNTTCATGATC-CTTGAGGTCCCTTCCAAC--CCGGGC

>CR1-C  
AGAGCAGCCCTGCGGAGAAGGACTT-  
GGGGGTCCTGGTGGACGAGAAGCTGGACATGAGCCAGCAGTGTGCGCTTGCAGCCCAGGCAAGGCAACTG  
TGTTCTGGGCTGCATTAATAAAAGGGGTGGCCAGCAGGGAGAGGGAGGTGATTGTCCCCCTCTACTCAGCT  
CTTGTGAGGCCCCATCTGGAGTACTGCGTCCAGGCCTGGGGCCCCCA--  
GTACAGGAAGGACGTGGAGCTCTTGGAGCGGGTCCAGAGGAGGGCCAC--  
TAAGATGATCAGAGGGCTGGAGCACCTCTCCTATGAGGAAAGGTTGAGGGAAGTGGGCTTGTTTAGCTTG  
GAGAAGAG--AAGGCTCCGGGGAGAC-----CTCATTGTGGCCTTCCAGTACTTGAAGGGA---  
GCGTATAAACAGGAGGGGGAACGGCTGTTTACGAGGGTGGATAGTGATAGGACAAGGGG-  
GAATGGTTTTAACTGAGACAGGG---  
GAGGTTTAGGTTAGATATTAGGAGGAAGTTTTTTCACACAGAGGGTGGTGACGCACTGGAACAGGTTGCC  
AAGGAGGTTGTGGATGCCCCATCCCTGGAGG-  
CATTCAAGGCCAGGCTGGATGTGGCTCTGGGCAGCCTGGTCTGGGACCCTGCAC-ATAG--CA-G---  
GGGGG-TTGAAGCTNGATGATC-ATTGTGGTCCTTTTCAAC--CCAGGC

>CR1-C2  
AGAGCAGCCCTGCGGAGAAGGACTT-  
GGGGGTCCTGGTGGACGAGAAGCTGGACATGAGCCAGCAGTGTGCGCTTGCAGCCCAGGCAAGGCAACTG  
TGTTCTGGGCTGCATTAATAAAAGGGGTGGCCAGCAGGGAGAGGGAGGTGATTGTCCCCCTCTACTCAGCT  
CTTGTGAGGCCCCATCTGGAGTACTGCGTCCAGGCCTGGGGCCCCCA--  
GTACAAGAAGGACGTGGAGCTCTTGAACGGGTCCAGAGGAGGGCCAC--  
TAAGATGATCAGAGGGCTGGAGCACCTCTCCTATGAGGAAAGGTTGAGGGAAGTGGGCTTGTTTAGCTTG  
GAGAAGAG--AAGGCTCCGGGGAGAC-----CTCATTGTGGCCTTCCAGTACTTGAAGGGA---  
GCGTATAAACAGGAGGGGGAACGGCTGTTTACGAGGGTGGATAGTGATAGGACAAGGGG-  
GAATGGTTTTAACTGAGACAGGG---  
GAGGTTTAGGTTAGATATTAGGAGGAAGTTTTTCACTCAGAGGGTGGTGACGCACTGGAACAGGTTGCC  
AAGGAGGTTGTGGATGCCCCATCCCTGGAGG-  
CATTCAAGGCCAGGCTGGATGTGGCTCTGGGCAGCCTGGTCTAGGACCCTGCNC-ATAG--CA-G---  
GGGGG-TTGAAGCTAGATGATC-NTTGAGGTCCCTTTTCAAC--CCAGGC

>CR1-C3  
AGAGTAGCCCTGCTGAGAAGGACTT-  
AGGGGTCCTGGTAGATGAAAACTTAACATGAGCCAGCAGTGTGCGCTTGCAGCCCAGGCAAGGCAATGG  
TATCCTGGGCTGCATCAGAAGAGGGGTGGCCAGCAGGGCGAGGGAGGTGATTGTCCCCCTCTACTCTGCC  
CTCGTGAGGCCCCATCTGGAGTACTGCGTCCAGGTCTGGGGCCCCCA--  
GCACAGGAAGATGTGGAGCTTTTGGAGNNGGTCCAGAGGAGGGCCAC--  
GAAGATGATCNGAGGGCTGGAGCACCTCTCCTATGAAGACAGGCTGAAGGAGCTGGGCTTGTTTCAGCCTG  
GAGAAGAG--AAGGCTGCGGGGAGAC-----CTCATTGCGGCCTTCCAGTATTTAAAGGGA---  
GNTTATAAACAGGAGGGAAATCAACTTTTTACACGGGTAGATAGTGATAGGACAAGGGG-  
GAATGGTTTTAACTAAAGGAGGG---  
AAGATTTAGATTAGATGTCAGGGGGAAGTTTTTCACTGAGAGGGTGGTGAGGTGCTGGAACAGGTTGCC  
AGAGAGGCTGTGGATGCCCCGTCCCTGGAGG-  
TGTTCAAGGCCAGGTTGGATGGGGCCCTGGGCAACCTGATCTAGAACCCTGCCT-GTGG--CA-G---  
GGGGG-TTGAAGCTTATGATGATC-CTTGAGGTCCCTTCCAAC--CCAAGC

>CR1-C4  
AGAGCAGCCCTGCGGAGAAGGACTT-  
GGGGGTCCTGGTGGACGAAAAGCTGGACATGAGCCAGCAGTGTGCNCTTGCAGCCCAGGCAAGGCAACAG  
TATCCTGGGCTGCATCAAAAGAGGGGTGGCCAGCAGGGAGAGGGAGGTGATTGTCCCCCTCTACTCTGCC  
CTTGTGAGGCCCCATCTGGAGTACTGCGTCCAGGCCTGGGGCCCCCA--  
GCACAAGAAGGATGTGGAGCTGTTGGAGCGGGTCCAGAGGAGGGCCAC--  
GAAGATGATCAGAGGGCTGGAGCACCTCTCCTATGAAGAAAGGTTGAGGGAGCTGGGCTTGTTTCAGCTTG

GAGAAGAG--AAGGCTCCGGGGAGAC-----CTCATTGCGGCCTTCCAGTACTTGAAGGGA---  
GCTTATAAGCAGGAGGGGGACCGACTTTTTACACGGTCTGATAGTGATAGGACAAGGGG-  
GAATGGCTTTAAACTAAAAGAGGG---  
GAGATTTAGGTTAGATGTTAGGAAGAAATCTTTACTCAGAGGGTGGTGAGGCGCTGGCACAGGCTGCCC  
AGAGAAGCTGTGGATGCCCCATCCCTGGAGG-  
CGTTCAAGGCCAGGTTGGATGGGGCCCTGGGCAGCCTGATCTGGAGCCCTGCCC-ATGG--CA-G---  
GGGGG-TTGGAACTAGATGATC-TTTAAGGTCCCTTCCAAC--CTAAGC

>CR1-D  
AGCGCAGCCCTGCCGAAAAGACCT-  
GGGGGTACTGGTGGATGGGAAGCTGGACATGAGCCAGCAATGTGCCCTCGCAGCCCAGAAAGCCAACCG  
TATCCTGGGCTGCATCAAAGAAGCGTGGCCAGCAGGTTCGAGGGAGGTGATCCTGCCCCTCTACTCTGCG  
CTGGTGAGGCCTCACCTGGAGTACTGCGTCCAGATGTGGAGTCCTCA--  
GTACAGGAGAGACATGGACCTGTTGGAGCGCGTCCAGAGGAGGGCCAC--  
AAAAATGATCCAAGGGATGGAACACCTCTCCTACGAGGACAGGCTGAGAGAGCTGGGGCTGTTTACAGCCT  
GGAGAAGAG--AAGGCTNCGAGGTGAC-----CTGATAGCGGCCTTTCAGTATCTAAAGGGG---  
AGCTACAGGAAAGAAGGGGACAGACTCTTTAGCAGGGTCTGTGGTGATAGAACAAGGGG-  
AAATGGCTTCAAAGCTCAAAGAGGG---  
TAGATTTAGGTTGGATATAAGGAAAAAGTCTTTTACAGTGAGGGTGGTGAGGCACTGGAACAGGTTGCCC  
AGAGATGTGGTTGATGCCCCGTCCCTGGAGA-  
CTTTCAAGGCGAGGCTGGATCAGGCCCTGGGCAACCTGATCTAGGTCCCTGTTC-ATTG--CA-G---GGGAG-  
TTGGA-CTAGATGACCTTTAAAGGTCCCTTCCAAC--TCTAAG

>CR1-D2  
AGCACAGCCCTGCCGAAAAGGACCT-  
GGGGGTACTGGTGGATGGCAAGCTGGACATGAGCCAGCAATGTGCCCTCGCAGCCCAGAAAGCCAACCG  
TATCCTGGGCTGCATCAAAGAAGCGTGGCCAGCAGGGCGAGGGAGGTGATCCTGCCCCTCTGCTCTGCG  
CTGGTGAGGCCTCACCTGGAGTACTGCGTCCAGATGTGGAGTCCTCA--  
GTACAGGAGAGACATGGACCTGTTGGAGCGCGTCCAGAGGAGGGCCAC--  
AAAAATGATCCAAGGGATGGAACACCTCCCCTACGAGGACAGGCTGAGAGAGCTGGGGCTGTTTACAGCCT  
GGAGAAGAG--AAGGCTCCGGGGAGAC-----CTGAGAGCGGCCTTTCAGTATCTAAAGGGG---  
GGCTGTAAGAAAGAAGGGGACAGACTCTTTAGCAGGGTCTGTTGTGACAGGACAAGGGG-  
AAATGGTTTCAAAGCTCAAAGAGGG---  
GAGATTTAGATTGGATATAAGGAAGAAGTTTTTTTACAATAAGGGTGGTGAGGCACTGGAACAGGTTGCCC  
AGAGAGGTGGTGGATGCCCCATCCCTGGAGA-  
CATTCAAGGTCAGGCTGGACGGGGCTCTGAGCAACCTGATCTAGGTCCCTGTTC-ATTG--CA-G---GGGAG-  
TTGGA-CTAGATGACCTTTAAAGGTCCCTTCCAAC--TCAAAC

>CR1-E\_Pass  
AGAGCAGCCCTGCGGAGAAGGACTT-  
GGGGGTGATGGTTGATGAAAACTCAACATGAGCCGGCAGTGTGCGCTCGCAGCCCAGAAAGCCAANCG  
NATCCTGGGCTGCATCAAAGGAGCGTGGCCAGCAGGTTCGAGGGAGGNGATTCTGCCCCTCTGCTCTGCT  
CTTGTGAGACCCACCTGGAGCGCTGCGTCCAGCTCTGGTGTCCCA--  
GCATAAGAAGGACATGGAACCTGTTGGAGCAAGTCCAGAGGAGGGCCAC--  
GAAGTTGATAAGAGGACTGGAGCACCTCCCCTACGAAGACAGGCTGAGAAAGTTGGGGCTGTTTACAGCCTG  
GAGAAGAG--AAGGTTGCGTGGAGAC-----CTCATAGCAACCTTCCAGTATCTGAAGGGG---  
GCCTACAGGGAAGCCGGAGAGGGACTCTTCGTCAGGAACTGTAGTGATAGGACAAGGAG-  
TAATGGGTACAACTGAAAGAGGG---  
GAAATTTAGGTTAGATATTAGGAAGAAATCTTTACTGTGAGGGTGGTGAGACACTGGAACAGGTTGCCC  
AGGGAGGTTGTGGATGCCCCANCCCTGGCAG-  
TGTTCAAGGCCAGGTTGGATAAGGCCTTGAGCAACCTGGTCTAGGTCCCTGCCC-ATGG--CAGG---  
GGGGG-TTGGGACTAGATGATC-TTTAAGGTCCNTTCCAAC--CCTTAA

>CR1-F  
AAGACTGTGTAGAGGAAATGGACCT-  
GGGGGTGTTGATTGACTAGACTGAACATGAGCCAGTGGTGTGCCAGGTGGCCAAGAAGGCCAATGG  
CATCCTGGCTTGTATCAGAAATAGTGTGGCCAGCAGGAACAGGGAAGTAATTGTCTCCCTGTACTCAGCA  
CTGGCAGGCTGCACCTTGAGTACTGTGTCCAGTTTTGGGGCCCTCA--

CTGTAAGAAAGACATTGAGGCCCTGGAGTGTGTCCAGAGGAGGGCAAC--  
AAAGCTGGTGAGGGGTCTGGAACACAGGCCTTATGAAGAGTGGCTGAAGGAGCTGGGATTGTTTCAGTCTG  
GAGAAGAG--GAGGCTCAGGGGAGAC-----CTTATTGCTCTCTATAACTACCTGAAGGGA---  
GGTTGTAGTGAGCTCGGGGTCAGCCTCTTCTCTCGTGTGAC-AGTGATAGAACGAGAGG-  
GAATGGCTTCAAGCTGCGCCAGGG---  
AAGATTCAGGCTGGACATTAGGAAATACTACTTCTCTGAAAGGGTGGTCAGGCACTGGAATGGGCTGCCC  
AGAGTGGTGGTGGAGTCACCGAGCCTGGTGG-  
TGTTTAAAGAGCATTGATGTTGTGTTGAGGGACATGGTTTAGCCATTGGTGA-AGGG--CG-----AATGG-  
TTGGA-CTGGATC---CTGTGGGTCTTTTCCAAC--CTTAGC

>CR1-F2

AAGACTGTGTAGAGGAAATGGACCT-  
GGGGGTGTTGATTGACGCTNGACTGAACATGAGCCAGCAGTGTGCCAGGTGGCCAAGAAGGCCAATGG  
CATCCTGGCTTGTATCAGAAATAGTGTGGCCAGCAGGAACAGGGAAGTAATTGTCCCCCTGTACTCAGCA  
CTGGTGAGGCCGCACCTCGAGTACTGTGTCCAGTTTTGGGCCCTCA--  
CTGTAAGAAAGACATCGAGGCCCTGGAGCGTGTCCAGAGGAGGGCAAC--  
AAAGCTGGTGAGGGGTCTGGAGCACAGGCCTTATGAGGAGCGGCTGAAGGAGCTGGGATTGTTTCAGTCTG  
GAGAAGAG--GAGGCTCAGGGGAGAC-----CTTATTGCTCTCTATAACTACCTGAAGGGA---  
GGTTGTAGTGAGCTGGGGGTCGGCCTCTTCTCTCGTGTGACTAGTGATAGGACTAGAGG-  
GAATGGCTTCAAGCTGCGCCAGGG---  
AAGGTTTCAGGCTGGACGTTAGGAAATACTACTTCTCTGAAAGGGTGGTCAGGCACTGGAATGGGCTGCCC  
AGGGAGGTGGTGGAGTCACCGACCCTGGAGG-  
TGTTCAAGGAACGTTTGGATGTTGTGTTGAGGGACATGGTTTAGCTATTGGTGA-TGGG--TG-----GATGG-  
TTGGA-CTGGGTGATC-CTGTGGGTCTTTTCCAAC--CTTGGT

>CR1-G

ATGACTGTGAAGAGGAAAGGGACCT-  
GGGGGTGTTGGTTGATGCTCGGCTGAACATGAGCCGACAGTGTGCCAGGTGGCCAAGAGGGCCAATGCC  
ATCCTGGCCTGCATTAGAAATAGTGTGGCCAGCAGGAGCAGGGAGGTAATCATCCCCCTGTACTCAGCAC  
TGGTGAGGCCGCACCTCGAGTACTGTGTTTCAGTTTTGGGCCCTCA--  
CTACAAGAAAGACATTGAGGCCCTGGAACGTGTCCAGAGAAGGGCAAC--  
GAAACTGGTGAGGGGTCTGGAGCACAAGTCTTATGAGGAGCGGCTGAGGGAGCTGGGATTGTTTAGTCTG  
GAGAAGAG--GAGGCTCAGGGGAGAC-----CTCATTGCACTCTACAACCTCCTGAAGGGA---  
GGTTGTGATGAGGAGGGGTTTGGCCTCTTCTCCCAGGCAACAA---ACAGGACCCGAGG-  
AAATGGCCACAAGTTGTACCAGAG---  
GAGGTTTAGATTAGACATAAGGAAAAACTTTTTCTCTCAGAGAGTGGTCAGGCACTGGAATGGCCTGCCC  
AGGGAGGTGGTGGAGTCGCCGTCCTGGCAG-  
TGTTCAAGAGGCGTCTGGATGAGGAGCTACGAGATATGGTTTAGGCAATGGTAA-TGGG--AG-----  
GACGG-TTGGA-CTAGATGATC-TTGTAGGTCCTTTCCAAC--CTTG-T

>CR1-H

AAAGCTGCCTGATGGAAAGGGACCT-  
TGGTGTACTGATGGACAGTCGGCTGAATATGAGCCAGCAGTGTGCCAGGTGGCCAAGAAGGCCAATGGC  
ATCCTGGCTTGTATCAGGAATGGTGTGGTGAGCAGGACTAGGGAAGTCATCCTGCCCCTGTACTCGGCAC  
TGGTGAGGCCTCACCTCGAGTACTGTGTTTCAGTTTTGGGCACCTCA--  
GTACAGAAAGGACATTGAGGTGCTGGAGCAGGTCCAAAGAAGGGCAAC--  
AAGGCTTGTGAAGGGCTTGGAGAATATGCCCTACGAGGAGAGACTGAAGGAACTGGGGCTGTTTAGTCTG  
GGGAAAAG--GAGGCTGAGGGGAGAC-----CTTATTGCTCTCTTCCAATATCTGAAAGGT---  
GCTTACAGCGAGAGCGGGGTTGGTCTCTTCTCACTGGTGACAGGTGACAGGACGAGGGG-  
AAATGGCCTCAAGTTGCGCCAGGG---  
TAAGTTTAGGTTGGATATCAGGAAANACTTCTTTACAGAAAGGGTTGTTAAGCACTGGAATAGGCTCCCC  
AGGGAGGTGGTTGAGTCACCATCCCTGGATG-  
TGTTTAAAACCGTTTGGATGTGGTGCTCAGGGACATGATTTAGGGTAGTATGG-TTAG--GT-----CGTGG-  
TTGGA-CTCGATGATC-TTAAAGGTCTTTTCCAAC--CTGAGC

>CR1-H2

AAAGCTGCCTGATGGAAAGGGACCT-  
TGGTGTACTGTTGGACAGTCGGCTGAATATGAGCCAGCAGTGTGCCAGGTGGCCAAGAAGGCCAATGGC

ATCCTGGCTTGTATCAGGAATGGTGTGGTGTGAGCAGGACTAGGGAAGTCATCCTGCCCCTGTACTCGGCATT  
GGTGAGGCCTCACCTCGAGTACTGTGTTTCAAGTTTGGGCACCTCA--  
GTACAAGAAGGACATGGAGGTACTGGAGCAGGTCCAGAGAAGGGCAAC--  
GAGGCTAGTGAAGGGCTTGGAAAATCAGCCCTATGAGGAGAGGCTGAGGGAGCTGGGGCTGTTTAGTCT  
GGGAAGAG--GAGGCTGAGGGGAGAC-----CTTACTTCTCTTCCAGTACCTGAAAGGT---  
GTTTACAGTGAGAGCGGGGTAGGTCTCTTCTACTGGTGACAGGTGACAAGACGAGGGG-  
AAATGGCCTCAAGTTGCGCCAAGG---  
TAAGTTTAGGTTGGACGTTAGGAAACACTTCTTTACAGAAAGGGTGGTTAAGCACTGGAATAGGCTCCCC  
AGGGAGGTGGTTGAGTCACCGTCCCTGGATG-  
TGTTAAGAGCCGTTTGGATGTGGTGCTCAGAGATATGATTTAGGGTACTATGG-TTAG--GC-----TGCGG-  
TTGA-CTTGATGATC-TTGAGGTCTTTCCAAC--CTGAGT

>CR1-I\_Tgu

AGAGCTGTTTCGGCAGAAAGGGACCT-  
GGGGGTGCTGGTTCGACAGCCGGCTGAACATGAGCCAGCAGTGTGCCAGGTGGCCAAGAAGGCCAATGG  
CATCCTGGCCTGTATCAAGAATAGTGTGGCCAGCAGGACCAGGGNAGTGATCGTCCCCCTGTACTCGGCA  
CTGGTGAGGCCGCACCTCGAGTGCTGCGTTCAGTTCTGGGCCCCTCA--  
CTTTAAAAAGGACATTGAGGTGCTGGAGCGTGTCCAGAGAAGGGCAAC--  
AAGGCTCGTGAAGGGTCTAGAAAACGTGTCTTATGAGGAACGGCTGAGGGAGCTGGGTTTGTTTAGTCTC  
GAGAAGAG--GAGGCTCAGGGGGGAC-----CTCATCGCTCTCTACAACCTGAAAGGA---  
GGTTGTAGTGAGGTGGGGGCCGGTCTCTTCTGCCGTGCCTGCAGTGAGAGGACCAGAGG-  
AAATGGCCTTAAGCTGAGACAGGG---  
GAGATTCAGATTAGATATTAGAAAAAANTTTTCACTGTTAGGGTGGTCAGGCATTGGAATAGGTTGCC  
AGGGAGGTGGTGGAGTCACCATCCCTGGAGG-  
TGTTAAGAGGCGTCTGGATCTGGCGCTGGGTGATGTGGTTTAGTA----GTGC-TGGG--TG-----GACGG-  
TTGA-CTNGATGATC-TTAAAGGTCTCTTCCAAC--CTTGAT

>CR1-J1\_Pass

AAAGCTGCCCAGCGGAAAAGGACCT-  
GGGGGTGCTGGTTCGACAGCCGGCTGAACATGAGCCAGCAGTGTGCCAGGTGGCCAAGAAGGCCAATGG  
CATCCTGGCCTGTATCAGCAATAGTGTGGCCAGCAGGACCAGGGCAGTGATTGTCCCCCTGTACTCGGCA  
CTGGTGAGGCCACACCTCGAGTNCTGTGTCCAGTTCTGGGCCCCTCA--  
CTNCAAGAAGGACATTGAGGTGCTGGAGCGTGTCCAGAGAAGGGCAAC--  
GGAGCTGGTGAAGGGTCTGGAGCACAAGTCCTGTGAGGAGCGGCTGAGGGAGCTGGGGNTGTTTAGCCT  
GGAGAAAAG--GAGGCTCAGGGGAGAC-----CTTATCGCTCTCTACAACCTGCCTGAAAGGA---  
GGNTGTAGCCAGGTGGGGGTTCGGCCTCTTCTCCCAGGCAACCAGCGACAGGACGAGAGG-  
ACATGGCCTCAAGCTGCGCCAGGG---  
GAGGTTTCAAGGTTGGACATCAGGAAGAATTTCTTACGGAAAGGGTGGTTAAGCATTGGAACGGGCTGCC  
AGGGAGGTGGTGGAGTCACCATCCCTGGAGG-  
TGTTCAAGAAACGACTGGACGTGGCACTTAGTGCTATGGTCTA-ANGGTGGTGT-TCGG--TC-----AAAGG-  
TTGA-CTCGATGATC-TCGGAGGTCTTTTCCAAC--CTNAAT

>CR1-J2\_Pass

AAAGCTGCCCAGCGGAAAAGGACCT-  
GGGGGTGCTGGTTCGACAGCCGGCTGAACATGAGCCAGCAGTGTGCCAGGTGGCCAAGAAGGCCAATGG  
CATCCTGGCCTGTATCAGCAATAGTGTGGCCAGCAGGACCAGGGCAGTGATTGTCCCCCTGTACTCGGCA  
CTGGTGAGGCCGCACCTCGAGTGCTGTGTCCAGTTCTGGGCCCCTCA--  
CTTCAGGAAGGACATTGAGGTGCTGGAGCGTGTCCAGAGAAGGGCAAC--  
GGAGCTGGTGAAGGGTCTGGAGCACAAGTCCTATGAGGAGCGGCTGAGGGAGCTGGGGTTGTTTAGCCTG  
GAGAAAAG--GAGGCTCAGGGGAGAC-----CTTATCGCTCTCTACAACCTGCCTGAAAGGA---  
GGTTGTAGCCAGGTGGGGGTTCGGTCTCTTCTCCCAGGCAACAAGCGACAGGACGAGAGG-  
AAACGGCCTCAAGTTGCGCCAGGG---  
GAGGTTTAGATTGGATATTAGGAAAATTTCTTCACTGAAAGGGTGGTCAGGCATTGGAACGGGCTGCC  
AGGGAGGTGGTGGAGTCACCGTCCCTGGAGG-  
TGTTCAAAAGACGTGTGGATGTGGCACTTGGGGACATGGTTTAGATGGCGGTGC-TGGG--TT-----AACGG-  
TTGA-CTCGATGATC-TTAGAGGTCTTTTCCAAC--CTAAAT

>CR1-J3\_Pass



ACAGCGGCCAGGCAGAAAGGGACCT-  
GGGGGTGCTGGTCGACAGCNGGCTGAACATGAGCCAGCAGTGTGCCAGGTGGCCAAGAAGGCCAATGG  
CATCCTGGCCTGTATCAGGAATAGTGTGGCCAGCAGGACCAGGGAAGTGATTCTTCCCCTGTACTCGGCA  
CTGGTGAGGCCGCACCTCGAGTGCTGTGTCCAGTTCTGGGCCCCTCA--  
GTTACAGGAAGGACGTTGAGGTGCTGGAGCGTGTCCAGAGAAGGGCAAC--  
GAGGCTGGTGAAGGGTCTGGAGCACAAGTCCTGTGAGGAGCGGCTGAGGGAGCTGGGGTTGTTTAGCCTG  
GAGAAAAG--GAGGCTCAGGGGAGAC-----CTTATCACTCTCTACAACCTGAAAGGA---  
GGNTGTAGCCAGGTGGGGGTCGGTCTTCTCCCAGGCAACCAGCGACAGGACGAGAGG-  
ACACAGTCTTAAGCTGCGCCAGGG---  
GAGGTTTAGGTTGGACATTAGGAAGAANTTCTTCACAGAAAGGGTGATTGGGCATTGGAATGGGCTGCC  
AGGGAGGTGGTGGAGTCACCGTCCCTGGAGG-  
TGTTTAAGGAAAGACTGGACGTGGCACTCAGTGCCATGGTCTA-AAGGTGGTGT-TNGG--TC-----ATAGG-  
TTGGA-CTCGATGATC-TCAGAGGTCTTTCCAAC--CTAGTT

>CR1-K1\_Tgu

ACAGTGCCCAGGCAGAAAGGGACCT-GGGGGCGCTGGTCGACAGC-  
GGCTGGACATGAGCCAGCAGTGTGCCCTGGTGGCCAA-AAGGCCAGTGGC-  
TCCTGGCCTGGGTCAGGAATGGTGTGGCCAGCAGGAGCAGGGAGCTCATCCTGCCCTGTGCTGGGCACT  
GCTGAGGGCACACCTCGAGTGCTGCGCCCAGCTCT-GGCCCTCA--  
GTTTGGGAAGGACGTTGAGATGCTCGAGCACGTCCAGAGGA-GGCAGC--  
GAGGCTGGAGAGGGGCTGGGAACACAAACCCTGTGAGGAACCCCTGAGGGAGCTGGGGGTGCTCAGCCT  
GGAGAAAAG--GAGACTCAGGGGTGAC-----CTCATCACTCTCCGCAGCT-CCTGAAAGGT---  
GGCTGTGCTCAGCT-GGGGCTGGGCTCTTTCTCCAGG----AACTGACAGAACCAGAGC-  
ACACAGCCTCGAGCTGCGCCAAGG---  
GAAATNCAGGTTGGATATTAGGAAAAAGTTTTTTACAGAAAGGGTGATAAAGTTCTGGAATGG-  
CTGCCCCGGGAGGTGGTGGAGTCACCATCCCTGGGTG-TGTTTAACAAA-  
GCCTGGATGTGGCACTGGGTGCCAGGGTTNAG-TTGAGGTGT-TGGG--GC-----TGGG-TTGA-  
CTCGATGATC-TTGAAGGTCTCTTCCAAC--CCGG-T

>CR1-K2\_Tgu

ACAGTGCCCAGGCAGAAAGGGACCT-  
GGGGGCGCTGGTCAACAGCNGGCTGAACGTGAGCCAGCAGTGTGCCCTGGTGGCCAAGAAGGCCAATGG  
C-  
TCCTGGCCTGGATCAGGAATGGTGTGGCCAGCAGGAGCAGGGAGGTCATTCTGCCCTGTACTCGGCACT  
GGTGAGGCCACACCTCGAGTGCTGTGTCCAGTTCT-GGCCCTCA--  
GTTTGGGAAGGACGTTGAGACGCTCGAGCGCGTCCAGAGGA-GGCAAC--  
GAGGCTGGAGAGGGGCTGGGAACACAAACCCTGTGAGGAACCGCTGAGGGAGCTGGGGGTGCTCAGCCT  
GGAGAAAAG--GAGACTCAGGGGTGAC-----CTCGTCACTCTCCACAGCT-CCTGAAAGGT---  
GGCTGTGCTCAGCT-GGGGTTGGGCTCTTTCTCCAGGCAGC-ACTGACAGAACCAGAGG-  
ACACAGCCTCAAGCTGCGCCAAGG---  
GAAATATAGGTTGGATATTAGGAAAAAGTTTTTCACAGAAAGGGTGATAAAGTTCTGGAATGG-  
CTGCCCCGGGAGGTGGTGGAGTCACCATCCCTGGGTG-  
TGTTTAAAAAAGCCTGGATGTGGCACTGGGTGCCAGGGTTTAG-TTGAGGTGT-TGGG--GC-----TGGG-  
TTGGA-CTCGATGATC-TTGAAGGTCTCTTCCAAC--CCGG-T

>CR1-K3\_Tgu

ACAGTGCCCAGGCAGAAAGGGACCT-  
GGGGGCACTGGTCGACAGCCGGCTGAACATGAGCCAGCAGTGTGCCCTGGTGGCCAAGAAGGCCAATGG  
C-  
TCCTGGCCTGGATCAGGAATGGTGTGGCCAGCAGGAGCAGGGAGGTCATTCTTCCCCTGTACTCGGCACT  
GGTGAGGCCACACCTCGAGTGCTGTGTCCAGTTCT-GGCCCTCA--  
GTTTGGGAAGGACGTTGAGACGCTCGAGCGCGTCCAGAGGA-GGCAAC--  
GAGGCTGGAGAGGGGCTGGGAACACAAACCCTGTGAGGAACGACTGAGGGAGCTGGGGGTGTTTACAGCCT  
GGAGAAAAG--GAGACTCAGGGGTGAC-----CTTATCACTCTCTACAACCTCCCTGAAAGGT---  
GGCTGTGGTTCAGGT-GGGGTTGGTCTCTTTCTCCAGGCAGCAACTGACAGAACCAGAGG-  
ACACAGTCTCAAGCTGCGCCAAGG---  
GAAATATAGGTTGGATATTAGGAAAAAGTTTTTCACGGAAAGAGTGATAAAGTACTGGAATGGTCTGCC

GGGGAGGTGGTGGAGTCACCATCCCTGGATG-  
TGTTTAAAAAAGACTGGATGTGGCACTCGGTGCCATGGTTTAG-TTGAGGTGT-TAGG--GC-----ATGGG-  
TTGGA-CTCGATGATC-TTGAAGGTCTCTTCCAAC--CTAG-T

>CR1-K4\_Tgu

ACAGTGCCCAGGCAGAAAGGGACCT-  
GGGGGTGCTGGTCGACAGCCGGCTGAACATGAGCCAGCAGTGTGCCCTGGTGGCCAAGAAGGCCAANGG  
CATCCTGGCCTGTATCAGGAATGGTGTGGCCAGCAGGAGCAGGGAGGTCACTTCTCCCCTGTACTCGGCA  
CTGGTGAGGCCACACCTTGAGTGCTGTGTCCAGTTCTGGGCCCCTCA--  
GTTTGGGAAGGACGTTGAGACGCTTGAGCGCGTCCAGAGGAGGGCAAC--  
GAGGCTGGTGAAGGGCTTGAACACAACCCTGTGAGGAACGGCTGAGGGAGCTGGGGGTGTTTAGCCT  
GGAGAAAAG--GAGACTCAGAGGTGAC-----CTTATCACTCTCTACAACCTCCCTGAAAGGT---  
GGCTGTAGTCAGGTGGGGGTTGGTCTCTTTCTCCAGGCAGCAACTGACAGAACGAGAGG-  
ACACAGTCTCAAGCTGCGCCAAGG---  
GAAATATAGGTTGGATATTAGGAAAAAGTTTTTTACGGAAAGAGTGATAAAGTACTGGAATGGTCTGCC  
GGGGAGGTGGTGGAGTCACCATCCCTGGATG-  
TGTTTAAAAAAGACTGGATGTGGCACTCGGTGCCATGGTTTAG-TTGAGGTGT-TAGG--GC-----ATGGG-  
TTGGA-CTCGATGATC-TTGAAGGTCTCTTCCAAC--CTAG-T

>CR1-L1\_Tgu

ACAGTGTCCAGGCAGAAAGGGACCT-  
GGGGGTGCTGGTCGACAGCCGGTTGGATATGAGCCAGCAATGTGCCTCGGTGGCCAAGAAGGCCAATGG  
CATCCTGGCCTGCATTAGGAATTGTGTGACCAGCAGGAGTAGGGAGGTTATTCTTCCCCTATACTCGGCGC  
TGGTGAGACCACATCTTGAGTGCTGTGTCCAGTTCTGGGCCCCTCA--  
GTTTCAAGGAAGGACGTTGAGATGCTTGAGCGCGTCCAGAGGAGGGCAAC--  
GAGGCTGGTGAAGGGCTTGAACACAAGCCCTACGAGGAACGTTTGAGGGAGTTGGGGTTGTTTAGCCTG  
GAGAAGAG--GAGGCTTAGAGGTGAC-----CTTATTGCTCTCTACAGCTTCCTGAAGGGA---  
GGTTGTAGACAGGTGGGGGTCGATCTCTTCCACCGGGCAGCAACTGGCAGAACAAGAGG-  
ACACAGTCTCAAGCTACGTCAGGG---  
AAGGTTTAGGTTGGATATTAGGAAAAAATTTTCACTGAAAGAATAATAAAATACTGGAATTGTCTTCT  
AGGGAGGTGGTGGAAATCACCATCTCTGGATA-  
TGTTTAAAAAAGACTGGACTTGGCACTTGGTGCTATAGTCTAG-TTGTGGTGT-TAGG--GC-----ATAGG-  
TTGGA-CTTGATGATC-TTAGAGGTCTCTTCCAAC--CTCA-T

>CR1-L2\_Tgu

ACAGTGTTCAGGCGGAAAGGGACCT-  
GGGGGTGCTGGTCGACAGCCGGTTGAATATGAGCCAGCAGTGTGCCTTGGTGGCCAAGAAGGCCAATGGC  
ATCCTGGCCTGCATTAGGAATTGTGTGACCAGCAGGAGCAGGGAGGTCACTTCTCCCCTGTACTCGGCGCT  
GGTGAGGCCGCACCTTGAGTGCTGTGTCCAGTTCTGGGCCCCTCA--  
GTTTGGGAAGGACGTTGAGATGCTTGAGCGCGTCCAGAGGAGGGCAAC--  
GAGGCTGGTGAAGGGCTTGAACACAAGCCCTGTGAGGAACGTTTGAAGGAGCTGGGGTTGTTTAGCCTG  
GAGAAGAG--GAGGCTTAGAGGTGAC-----CTTATTGCTCTCTACAACCTTCCTGAAGGGA---  
GGTTGTAGACAGGTGGGGGTCGGTCTCTTCCACCGGGCAGCAACTGACAGAACAAGAGG-  
ACACAGTCTCAAGCTACGTCAGGG---  
AAGGTATAGGTTGGATATTAGGAAAAAATTTTCAACGAAAGAATAATAAAGTACTGGAATTGTCTTCCC  
AGGGAGGTGGTAGAATCACCATCTCTGGATG-  
TGTTTAAAAAAGACTGGACATGGCACTTGGTGCTATAGTCTAG-TTGAGGTGT-TAGG--GC-----ATAGG-  
TTGGA-CTTGATGATC-TTAGAGGTCTCTTCCAAC--CTCA-T

>CR1-L3A\_Crp

GAAGCAGCGACTCTGAAAAGGACTT-  
GGGGGTACGGTGGATAATCAGCTGAACATGAGCTNCCAGTGCGACGCTGTGGCCAAAAGGGCTAATGC  
GATCCTTGATGCATNAACAGGGGAATCNCGAGCAGGACTAGGGAGGTNATATTNCCTCTCTATTCGGCA  
CTGGTGAGACCGCNGCTGGAGTACTGCGTCCAGTTCTGGNNNCCACA--  
CTTCAAGAAGGATGTTGANAAATTGGAGAGGGTTCAGAGAAGAGCCAC--  
GAGAATGATTAAAGGACTGGAAAACATGCCTTATGGNGAGAGACTGAAGGAGCTCGATCTATTTAGCTTA  
TCAAAGAG--AAGGCTGAGGGGTGAC-----TTGATCGCAGTCTATAAGTACCTACACGGG---  
GAGCAGAAATCTGGTAATGGAGGGCTCTTCACTAGCGGACAAAGGTATAACAAGANN-

CAACGGCCGNAAGTTGAAGCTAGA---  
CAAATTCAGGCTAGANATNAGGAGNAACTTTTTNACAGTGAGGGTAGTTAAGCACTGGAACAGNTTACCA  
AGGGANGTGGTGGANTCTCCATCNCTGGAGG-  
TCTTTAAANCAAGATTGGATGCTTTTCTAGAAGACANGCTCTGGTGGCCTGCGT-TA-G--CA-----GGGGG-  
TCGGA-CTAGATGATCTNCNGAGGTCCCTTCCGGC--CCTA--

>CR1-L3B\_Crp

AAAGCAGTGACTCTGAAAAGGATTT-  
AGGGGTCATAGTGGACAAGCAACTCAACATGAGCTCCCAGTGCGATGCTGTGGCAAAAAGGGCTAATGC  
GATCCTTGGATGTATAAACAGGGGAGTAGCGAGTAGGAGCAGGGAGGTGATTTTACCTCTGTATACGGCA  
TTGGTGAGACCGATACTGGAATACTGCGTNCAGTTCTGGTGTCCACA--  
TTTTAAAAAGGATGTTGAAAAATTGGAGAGGGTGCAGAAAAGAGCCAC--  
AAAAATGATTCGAGGGCTGGAGAAAATGCCTTACAGTGAGAGACTTAAAGAGCTCAATCTGTTTAGCTTA  
TCAAAAAG--AAGATTGAGAGGTGAC-----TTGATTACGGTGTATAAGTACCTTCACGGG---  
GAGAAAATACCGGGTACTAAAGGGCTCTTTAATCTAGCGGAGAAAGGCATAACAAGAAC-  
CAATGGCTGGAAGCTGAAGCCAGA---  
CAAATTCAAATTAGAAAATAAGGCACANATTTTTAACAGTGAGGGTGATTAACCACTGGAACAAACTACCA  
AGGGAAGTGGTGGATTCTCCATCTCTTGATG-  
TCTTCAGATCAAGACTGGATGCCTTTCTGGAAGATATGCTTTAGTGGCCTGTGN-TATA--CA-----GGAGG-  
TCAGA-CTAGATGATC--TAATGGTCCCTTCTGGC--CTTA--

>CR1-X1

AGAGCAGCCCCGCGGAAAGGGATCT-  
GGGGGTTCTGGTTGACGGCAAGTTGAATNTGAGCCAGCAGTGTGCCCTGGCAGCCCAAAGGGCCAACCGT  
ACCCTGGGGTGCACCAGGCCAGCACTGCCA-  
CCGGGCGAGGGGAGGGGTTGTCCCGCTCTGCTCTGCGCT-  
GTGCGGCCTCACCTCCAGCACTGGGTGCAGGTTTGGGTGCCACA--  
ATATAAGAAGGACATAAAACTATTAGAGAGCGTCCAAAGGAGGGCTAC--  
AAAGATGGTGAAGGGTCTGGAGGGCAAGGTGTGTGAGGAGCGGCTGAGGTCCCTGGGTTTGTTCAGCCC  
AGAGCAGAG--GAG-CTGAGGGGAGGC-----CTCATGGCGG-CTGCAGCTCCTCACAGGGA-----  
GCGGAGGGGCAGCGCTGAGCTCTGCTCTCTG--TGACAGCGACAGGGGCCCGAGG-  
GAACGGCATGGAGCTGTGTCAGGG---GAGGGGCAGC-TGGGGGTTAGGGANAGGGTCTGCACCA-  
GAGGGCGGTGGG--ATGGAACAGGCTGCCAGGGCAGTGGGCACGGCCCCGAG-CTGCCGG-  
AGTTCAAGGAGCGTTTGGACAGCGCTCTCAGACATAGGGTTTGGAGTCTGTGT-GGAG--CC-----AGGAG-  
TTGGA-CTCGGTGATCCTTGTGGGTCCCTTCCAAC--TCGGA

>CR1-X1\_Pass

AGAGCAGCGCCGCGGAAAGGGACCT-GGGGGTCTGGTTCGATGGCAAGTTGAACATGAGCCAGCAGTGC-  
-  
CCTGGCAGCCAGGAGGGCCAACCCTGTCCTGGGGGGCATCAGGCACAGCATCGCCAGCCGGGCAAGGGA  
GGGGATTGTCCCGCTCTGCTCTGCGCTGGGGCGGCCTCACCTCGAGTGCTGGGGGCAGTTTTGGGCGCCAC  
A--ATATAAGAAAGACATTAAGCTATTAGAGAGCGTCCAAAGGAGGGCAAC--  
GAGGATGGTGAAGGGCCTTGAGGGGAAGCCGTATGAGGAGCGGCTGAGGTCACTTGGTCTGTTCAGCCTG  
GAGAAGAG--GAGACTGAGGGGAGAC-----CTCATTGCAGTCTACAACCTCCTCGTGAGG---  
GGAAGAGGAGGGGCAGGCACTGATCTTCTCTGTGGTGACCAGTGACAGGACCCGAGG-  
GAATGGCCTGAAGCTGTGTCAGGG---  
GAGGTTTAGGTTGGATATCAGGAAAAGGTTCTTCACCCAGAGGGTGGTTGGGCACTGGAACAGGCTCCCC  
AGGGAAGTGGTCACAGCACCAAGCCTGACAG-  
AGTTCAAGAAGCGTTTGGACAATGCTCTCAGGCACATGGTGTGAGGTCTGTGC-AGGG--CC-----AGGAG-  
TTGGA-CTCGATGATCCTTGTGGGTCCCTTCCAAC--TCAGCA

>CR1-X2

AGAGCAGCCCCGCGGAAAGGGATCT-  
GGGGGTTCTGGTTGACAGCAAGTTGAACATGAGTCAGCAGTGTGCCCTGGCAGCCAGAAGGGCCAACCGT  
ACCCTGGGGTGCATCAGGCCAGCACTGCCAGCCGGGCGAGGGAAGGGATTGTCCCGCTCTGCTCTGCGC  
TGGTGCAGCCTCACCTCGAGCACTGTGTGCAGTTTTGGGCGCCACA--  
ATATAAGAAGGACATAAAACTATTAGAGAGCGTCCAAAGGAGGGCTAC--  
GAAGATGGTGAAGGGTCTAGAGGGCAAGACGTATGAGGAGCGGCTGAGGTCCCTTGGTTTGTTCAGCCCA

GAGCAGAG--GAG-CTGAGGGGAGGC-----CTCATGGCGG-CTGCAGCTCCTCACAGGGA-----  
GCGGAGGGGCAGCGCTGAGCTCTGCTCTCTG--TGACAGCGACAGGACCCGAGG-  
GAACGGCATGGAGCTGCGTCAGGG---GAGGGTCAGG-TGGGGGTTAGGAAAAGGTTCTTCACCA-  
GAGGGTGGTGGGC--ATGGAACAGGCTCCCCAGGGCAGTGGTCACGGCCCCGAG-CTGCCGG-  
AGTTCAAGAAGCATTGGAACAACGCTCTCAGACATAGGGTTTGAGGTCTGTGT-GGAG--CC-----AGGAG-  
TTGA-CTCGATGATCCTTGTGGGTCCCTTCCAAC--TCGGGA

>CR1-X2\_Pass

AGAGCAGCCCTGCGGAAAGAGATCC-GGGGGTTCGGGTTCGATGGCAAGTTGAACATGAGTCAGCAGTGC--  
CCTGGCAGCCAGGAGGGCCAACCGTGTCTGGGGTGCATCAGGCACAGCATCGCCAGCCGGGCGAGGGA  
GGGGATTGTCCCGCTCTGCTCTGCACTGGGGCGGCCTCACCTCGAGTNCTGGGTGCAGTTTTGGGCGCCNC  
A--ATACAAGAAGGACATCAAACCTATTAGAGTGTGTCCAGAGGAGGGGCGAC--  
CAAGATGGTGAAAGGTCTCGAGGGCAAGACTTANGAGGAGCGGCTGAGGTCACTTGGTTTGTTCAGCTTG  
GAGAAGAG--AAGGCTGAGGGGTGAC-----CTCATCGCAGTCTACGNCTTCTCAAGGGG---  
GGCAGCGGAGGGGGAGGTGCTGATCTCCTCTCTCTGGTGACCAGCGATAGGACACGAGG-  
AAATGGAATGAAGCTGCGTCAGGG---  
GAAGTTCAGATTGGACATTAGGAAAAGGTTCTTCACTGAGAGGGTGGTTCGGTCACTGGAACAGGCTCCCC  
AGGGAAGTGGTCACGGCACCAAGCCTGTCAG-  
AGTTCAAGGAGCGTCTGGACGATGCTCTTAGTCATATGGTTTAGAGTCCTGCGA-GGAG--CA-----GGGAG-  
TTGA-CTCGATGATCCTTATGGGTCCCTTCCAAC--TTGAGA

>CR1-X3\_Pass

AGAGCAGCCCTGCAGAAAGGGATCT-  
GGGGGTGCTGGTTCGGCAGCAGGCTCAGTGTGAGCCAGCAGTGTGCCCTGGCAGCCAAGAGGGCAAACCC  
CATCCTGGGGTGCATCAAACACAGCATCACCAGCCGGTCAAAGAGGTGATTATCCCGCTGTATTCAGCG  
TTGGTGCAGCCTCACCTTGAGCGCTGTGTGCAGTTCTGGGCCCCACA--  
ATTAAAGAAGGATGTGAAGGTCCTTGAATGCGTCCAGAGGAGGGCAAAC--  
AAAGCTGGTGAAAGGGCTGGAAGGAATGTCCTGTGAGGAGCGGCTGAGGACTCTGGGCTTGTCTAGTTTG  
GAGAAAAG--GAGGCTGAGGGGCGAC-----CTCATTGCTCTCTACAGCTTCTGAGGAGG---  
GGAAGTGGAGAGGGAGGTGCTGANCTCTTCTCCCTGGTATCCAGTGACAGGACGCGTGG-  
GAATGGTTCAAAGCTGCGCCAGGG---  
GAGGTTCACTGGACATTAGGAAGCATTCTTTACCGAGAGGGTGGTCAAACACTGGAACAGGCTTCT  
AGAGAGGTGGTTCGATGCCCAAGCCTGTCAG-  
TGTTTAAAGAGGCATTTGGACAATGCCCTTAATAACATGCTTTAAAGCCCTGAAG-TGGT--CA-----GGCAG-  
TTGA-CTAGATGATCGTTGTAGGTCCCTTCCAAC---TGAAA

>CR1-Y

AGAGGAGCTCTGCGGAGAAGGACCT-  
GGGGGTCTGGTGGACGACAGGTTGGCCATGAGCCAGCAGTGTGCCCTGGTGGCCAAGAAGGCCAATGG  
GATCCTGGGGTGCATTAAGAGGAGCGTGGCCAGCAGGTCAAGGGAGGTGATCCTCCCCCTCTACTCTGCC  
CTGGTCAGGCCTCACCTGGAGTACTGTATCCAGTTCTGGGCTCCCCG--  
GTACAAAAAAGACAGGGATCTCCTGGAGAGAGTCCAGCGGAGGGCCAC--  
AAAGATGATAAAGGGCCTGGAGCATCTCCCTATGAGGAAAGGCTGAGCGACCTGGGTCTGTTCAGCCTT  
GAGAAAAG--AAGACTCAGAGGGGAT-----CTTATTAATGTTTATAAATATCTTAAGTGT---  
GGGAGTCAAAGGGACATGGCCAACCTCTTTTCAGCGGTCTGTGGGGACAGGACAAGGGG-  
AAACGGCCATAAACTGGAGCATAG---  
GAAGTTCGCACCAATATGCGAAGGAACCTTCTTACAGTGAGGGTGACGGAGCACTGGAACAGGCTGCCC  
AGGGAGGTTGTGGATTCTCCTTCTCTGGAGA-  
TATTCAAGACCCGCCTGGACGCCTACCTGTGCAGCCTGCTGTAGGGGCCTGCTT---TG--CA-G---GGGG-  
TTGA-CTCGATGATCTCTGGAGGTCCCTTCCAGC--CCCTAC

>CR1-Y1\_Aves

AAAGCAGCTTNGCAGAAAAGGACCT-  
GGGGGTCTGGTGGACACCAAGCTGAACATGAGCCAGCAATGTGCCCTTGCGGCAAAGAAGGCNAACGG  
TATCCTGGGCTGCATTAGGNAGAGCGTTGCCAGCAGGTTCGAGGGAGGTGATCCTTCCCCTCTACTCAGCA  
CTGGTGAGGCCACACCTGGAGTGTGTGTCCAGTTCTGGGCTCCCCA--  
GTACAAGAGAGACATGGACATACTGGAGAGAGTCCAGCGAAGGGCCAC--  
GAAGATGATTAAGGGACTGGAGCATCTCTCCTATGAGGAAAGGCTGAGAGAGCTGGGACTGTTTCAGCCTG

GAGAAGAG--AAGGCTCAGGGGGGAT-----CTTATCAATGTGTATAAATACCTGAAGGGA---  
GGGTGCAAAGAGGACGGAGCCAGGCTCTTTTCAGTGGTGCCAGTGACAGGACCAGAGG-  
CAATGGGCACAACTGAAACACAG---  
GAGGTTCCCTCTGAACATCAGGAAACACTTTTTCACTGTGAGGGTGACCGAGCACTGGCACAGGTTGCC  
AGAGAGGTTGTGGAGTCTCCATCCTTGGAGA-  
TATTCAAAGCCGTCTGGACACGGTCTGGGCAACCGGCTCTAGGGCCCTGCTT--GAG--CA-G---GGGG-  
TTGA-CCAGATGACCTCCAGAGGTCCCTTCCAAC--CTCAGC

>CR1-Y2

AGAGGAGCTCTGCAGAGAGGGACCT-  
GGGGTCTCTGGTGGACAACAGGTTGGCCATGAGCCAGCAGTGTGCCCTGGTGGCCAAGAAGGCCAATGG  
CATCCTGGGGTGCATTAAAAAGAGCGTGGCCAGCAGGTCAAGGGAGGTGATCCTCCCCCTCTACTCTGCC  
CTGGTGAGGCCTCACCTGGAGTACTGTGTCCAGTTCTGGGCTCCCCG--  
GTACAAAAAAGACAGGGATCTCCTGGAAAGAGTCCAGCGGAGGGCCAC--  
AAAGATGATAAAGGGCCTGGAGCACCTCTCTTATGAGGAAAGGCTGAGCGACCTGGGTCTGTTCAGCCTT  
GAGAAAAG--AAGACTGAGAGGGGAT-----CTGATCAATGTCTATAAATATCTAAGGTGC---  
GGGAGGCAAAGGGACGAGGCCAGACTCTTTTCAGCGGTGCGTGGCGATAGGACAAGGGG-  
AAACGGCCACAACTGAAGCATAG---  
GAAGTCCGCACAAATGTGCGTAAGA ACTTCTTCACAGTAAGGGTGACGGAGCACTGGAACAGGCTGCC  
AGAGAGGTTGTGGAGTCTCCTTCTCTGGAGA-  
CGTTCAAGACCCGCCTGGACGCCTACCTGTGCAACCTGGTCTAGGAGCCTGCTT--TGG--CA-G---GGGG-  
TTGA-CTNGATGATCTCTAGAGGTCCCTTCCAAC--CCCTAC

>CR1-Y2\_Aves

AAAGCAGCTTTGCAGAAAAGGACCT-  
GGGGTCTCTGGTGGACANCAAGCTGANCATGAGCCAGCAATGCGCCCTTGC GGCAAAGAAGGCCAACAG  
CATCCTGGGCTGCATTAGGAAGAGCGTTGCCAGCAGGTGAGGGAGGTGATCCTTCCCCCTCTGCTCAGCA  
CTGGTGAGACNACATCTGGAGTGTCTGTGTCCAGTTCTGGGCTCCCCA--  
GTACAAGAGAGACACGGACATACTGGAGCGAGTCCAGCGAAGGGCCAC--  
GAAGATGATTAAGGGACTGGAGCATCTGNACATACGAGGAGAGGCTGAGAGAGCTGGGACTGTTCAGCCT  
GGAGAAGAG--AAGGCTCAGGGGAGAT-----CTTATCAATGTGTATAAATACCTGATGGGA---  
GGGAGTAAAGAAGACGGAGCCAGACTCTTCTCAGTGGTGCCAGTGANAGGACAAGAGG-  
CAATGGGCACAACTGAAATACAG---  
GAAATTCCATTTAAACATAAGGAAANATNTTTTTACTGTGAGGGTGGTCAAACACTGGAACAGGTTGCC  
AGAGAGGTTGTGGAGTCTCCATCCTTGGAGA-  
TATTCAAACCCGACTGGACACGGCCCTGAGCAACCTGCTCTAGGACCCTGCTT--GAG--CA-G---GGGG-  
TTGA-CTAGACGATCTCCAGAGGTCCCTTCCAAC--CTCAAC

>CR1-Y3

AGAGGAGCTCTGCGGAGAAGGACCT-  
GGGGTCTCTGGTGGACAACAGGTTGGCCATGAGCCAGCAGTGTGCCCTTGTGGCCAAGAAGGCCAATGGT  
ATCCTGGGGTGCATTAAAAAGAGCGTGGCCAGCAGGTGAGGGAGGTGATCCTCCCCCTCTACTCTGCC  
TGGTGAGGCCACATTTAGANTACTGTGTCCAGTTCTGGGCTCCCCA--  
GTTCAAAAAAGACAGGGATCTCCTAGAAGGAGTCCAGCGGAGGGCCAC--  
AAAGATGATAAAGGGCCTGGAGCATCTCCCGTATGAGGAAAGGCTGAGTAACCTGGGTCTGTTCAGCCTG  
GGGAAAAG--AAGACTGAGAGGGGAT-----  
CTGATAAATGTTTATAAATATCTAAAGGGAGGTGGGAGGCAAATGGATGAGGCCAGGCTCTTCTCGGTGG  
TGTGTAGCGATAGGACAAGGAG-TAATGGCCTAAACTTGAACATAG---  
GAAGTCCGTAACATGCGGAAGA ACTTCTTTACGGTAAGGGTGACGGAGCACTGGAACAGGTTGCC  
AGAGAGGTTGTGGAGTCTCCTTCTATGGAGA-  
TATTCAAGACCCGTCTGGACGCCTACCTGTGCGACCTATTGTAGGTACCTGCTT--TAG--CA-G---GGGG-  
TTGA-CTCGATGATCTCTTGAGGTCCCTTCCAAC--CCCTGC

>CR1-Y4

AGAGGAGCTCTGCAGAGAAGGACCT-  
GGGTGTCTCTGGTGGACAACAGGTTGGCCATGAGCCAGCAGTGTGCCCTTGTGGCCAAGAAGGCCAATGGT  
ATCCTGGGGTGCATTAAAAAGAGCGTGGCCAGCAGGTGAGGGAGGTGATCCTCCCCCTCTACTCTGCC  
TGGTGAGGCCACATCTGGAGTACTGTGTCCAGTTCTGGGCTCCCCA--

GTTCAAGAAAGACAGGGANCTCCTAGAGAGAGTCCAGCGGAGGGCCAC--  
AAAGATGATGAGGGGCTGGAGCATCTCCTNTATGAGGAAAGGCTGAGAGACCTGGGACTGTTTCAGCCTG  
GAGAAGAG--AAGACTGAGAGGGGAT-----CTCATCAATGCTTATAAATATCTAAAGGGA--  
TGGGAGTCAAGTGGATGGGGCCAGGCTCTTTTCAGTGGTGCAGCGACAGGACAAGGGG-  
CAATGGGCANAACTGGAACACAG---  
GAAGTTCATACGAACATGAGGAAGAACTTCTTTACTGTGAGGGTGACGGAGCACTGGAACAGGCTGCCC  
AGAGAGGTTGTGGAGTCTCCTTCTCTGGAGA-  
TATTCAAGACCCGCCTGGACGCCTTCCTGTGCGACCTGCTGTAGGAACCTGCTT--TAG--CA-G---GGGGG-  
TTGGA-CTCGATGATCTCTAGAGGTCCCTTCCAAC--CCCTGC

>CR1-YB1\_Tgu

AAAGCAGCTCTGCGGGGAAGGACCT-  
GGGGGTCTTGGTGGACAACGAGCTGTCCATGAGCCAGCAGTGTGCCCTGGGGGCAAGAAGGCCAATGG  
GATCCTGGGGTGCACCGGGAAGAGCATTGCCAGCAGGTC-  
AGGGAGGTGATCCTGCCCCTCTGCTCAGCCCTG--  
TGAGGCACATCTGGAGTGTGTGTCCAGCTCTGGGCTCCTCA--  
GGACAGGAGGGACACGGAGCTCCTGGAGCGGGGCCAGCGGAG-GCTGC--  
GGAGATGATGAAGGGCCTGGAGCATCTCCCTGNCGAGGAAAGGCTGAGGGAGCTGGGGCTGCTCAGCCT  
CGAGAGGAGCCCCAGCTGAGAGGGGCC-----CTCAGCCCTGGGTGTCCCTGTCTGCAGGGA---  
GGGCTCAGAGCA---GGGCCAGGCTCTGCTCCGGGG-GCCCAGCAATGGCACCAGA-G-  
GAACGGGCAGGGACTG-AGCCAG---GAAGTTCACCTGGACATGAGGCAGAACTTCTTTCTGTGC-  
AGTGACCGAGCACTGAGACAGATTGTCCAGAGAGGGTGTGGAGTCTCCCTCACTGGGGA-  
TATTCCAGAACCGTCTGGACACAATCCTGTGCCCTGTGCTCTGGGGCCCTGCTG--GAG--CA-G---GGAGG-  
TGGGA-CCAGATGACCCACTGTGGTCCCTTCCAGC--CTGACC

>CR1-YB2\_Pass

AAAGCAGCTCTGCGGAGAAGGACCT-  
GGGGGTCTTGGTGGACAACAAGCTGTCCATGAGCCAGCAGTGTGCCCTTGTGGCCAAGAAGGCCAATGGT  
ATCCTGGGGTGCATTAGGAAGAGCATTGCCAGCAGGTCGAGGGAGGTGATCCTGCCCCTCTACTCAGCCC  
TGGTGAAGCCACATCTGGAGTGTGTGTCCAGTTCTGGGCTCCTCA--  
GNACAAGAGAGACATGGAGCTCCTGGAGCGGGTCCAGCGGAGGGGCNAC--  
AAAGATGATTAAGGGACTGGAGCATCTCTTTACGAGGAAAGGCTGAGGGAGCTGGGCCTGTTTCAGCCTC  
GAGAAGAG--ACGACTGAGAGGGGAC-----CTCATCAATGTCTGTNAGTATCTGAAGGGA---  
GGGTGTCAAGAGGATGGAGCCAGGCTCTTCTCGGTGGTGGCCAGCAATAGGACAAGAGG-  
CAACGGGCAGAACTGATGCACAG---  
GAAGTTCACCTGAACATGAGGAAGAACTTCTTTACTGTGCGGGTGACCGAGCACTGGAACAGATTGCC  
AGAGAGGTTGTGGAGTCTCCCTCACTGGAGA-  
TATTCAAGAACCGTCTGGACGAATCCTGTGCCATGTGCTCTAGGACCCTGCTT--GAG--CA-G---GGAGG-  
TTGGA-CCAGATGACCCACTGTGGTCCCTTCCAAC--CTGACC

>CR1-Y\_Pass

AGAGCAGCTCTGCGGAGAAGGACCT-  
GGGAGTCTTGGTGGATGACAAGCTGACCATGAGCCGGCAGTGTGCCCTTGCAGGCCAGGAGGGCCAGTGGT  
ATCCTGGGGTGCATCGGGAAGAGTGTGGCCAGCAGGTCGAGGGAGGTGATCCTGCCCCTCTACTCGGCC  
TGGTGAAGCCACATCTGGAGTGTGTGTCCAGTTCTGGGCTCCTCA--  
GTACAAGAAAGACAAGGAGCTACTGGAGAGGGTCCAGCGGAGGGGCCAC--  
AAAGATGATNAGGGTCTGGAGCATCTCTTTATGAGGAGAGACTGCGGGAGCTGGGCCTGTTTAGTCTG  
GAGAAGAG--AAGACTGAGAGGGGAT-----CTCATCAATGCATATAAATATCTCAAAGGC---  
GGGTGCCAAGAGGATGGTGCCAGACTCTTTTCAGTGGTGGCCAGCGACAGGACGAGGAG-  
CAATGGCCATAAACTAAAACACAA---  
GAAGTTCACCTCAACATGAGGAAGAACTTCTTTACATTGAGGGTGGCAGAGCACTGGAACAGGCTGCCC  
AGGGAGGTCGTGGAGTCTCCCTCTCTGGAGA-  
CATTCAAAACCCACCTGGACGCGTTCCTGTGTNACCTGCTCTAGGACCCTGCCT--TGG--CA-G---GGGGG-  
TTGGA-CTAGATGATCTCCAGAGGTCCCTTCCAAC--CCTAAC

>CR1-Z1\_Pass

GGAGCAGCTCTGTGGAAAGGGACCT-  
GGGGGTCTTGGTGGACAACAAGCTCAATATGAGTGAACAGTGTGCTGCTGCGGCAAAGAAAGCCAACAG

GATGCTGGGCTGCATCAACAAGGGCATCACCAGCAGAGATAAAGAAGTCATTATCCCCTCTACTCAGCG  
CTTGTTCAGGCCACACCTGGAATACTGTGTTTCAGTTTTGGTCCCCGCT--  
ATACAAAAAAGATGTGGACAGGCTGGAGAGGGTCCAGAGAAGGGCCAC--  
AAAGATGATCAAAGGACTGGGAAGCCTGCCATGTGAGGAAAGGCTGAGAGAACTGGGTTTGTTCAGCCTT  
GAGAAAAG--AAGGCTTAGGGGAGAC-----CTTATCACCATGTTCCAGTATTTAAAGGGT---  
GGCTACAAAGAAGATGGAGACTCCCTTTTTACAAGGAGTCACATGGAAAAGACGAGGGG-  
TAATGGGTACAAGTTACTCCTGGG---  
GAGATTCCGATTGGACACAAGAGGAAAATTTTTTACAATGAGAACAATCAGCCATTGGAATAATCTCCCC  
AGGGAAGTGGTGGATTCCCCAACGTTGGACA-  
CTTTTAAGATTTCGGCTGGACAGGGTGCTGGGCCATCTTGTCTAG-ACCGTGCTT-TTGC--CAAG---AAAGG-  
TTGGA-CCAGATGATC-CTTGAGGTCCCTTCCAAC--CTGG--

>CR1-Z2\_Pass

GGAGCAGCCTTGCTGAAAGGGACCT-  
GGGGGTCTTGGTGGACAACAAGCTGANCATGAGTCAGCAGNGCGCCGCTGCAGCAACGAAGGCAAATCG  
GATCCTGGGCTGCATCCGCAGGGGCATTACTAGCAGAGATAGAGACGTGATCATCCCCTCTACTCAGCG  
CTTGTTCAGGCCGCACCTGGAGTACTGTGTCCAGTTCTGGTCCCCACA--  
ATTCAAGAAAGACGCGGACAGACTGGAGAGGGTCCAAGGAGGGGCCAC--  
GAAGATGATCAAAGGGCTGGAGAACCTGCCCTGTGAGGAAAGACTGAAGGAGTTAGGTCTTTTCTCCCTG  
GAGAAGAG--AAGGCTTAGGGGGGAC-----CTCATCACAGTATTCCAGTACTTAAAGGGC---  
GGCTACAAAGAGGACGGAGGCTCTCTTTCACAAGGAGCCACATGGAGAAGACAAGGGG-  
CAACGGGTACAAGTTGCACCGGGA---  
GAGGTTTCATCTCGATATAAGAAAGAAATTTTTTACAGTGAGAACAATCANTCACTGGAACAACCTCCCC  
AGGGATGTGGTAGAGTCCCCATCACTGGAGG-  
TTTTCAAGACGCGATTGGACAGGGTGCTAGATAATCTCATCTAG---GCTCCCT-TTCC--CACG---AAAGG-  
TTGGA-CCAGATGATCTTTCGAGGTCCCTTCCAAC--CTGGG

>CR1\_1a\_XT

GGGTATCCTTAATGGAGAAGGATCT-  
AGGGGTTTTTGTAGATNACAAGTTGTCTAATTCCAGGCAGTGTTCATTCTGTGGCTACTAAAGCAAATAAAG  
TGCTGTCTTGTATAAAAAAGGGCATTGACTCAAGGGATGAGAACATAATTTTGCCTCTTTATAGGTCCCTG  
GTAAGGCCTCACCTTGAGTATGCAGTGCAGTTTTGGGCTCCAGT--  
CCTTAAGAAGGATATTAATGAGCTGGAGAGAGTGCAGAGACGTGCAAC--  
TAAACTGGTAAAGGGGATGGAAGATTTAAGCTATGAGGTTAGACTGTTCGAGGTTGGGGTTGTTTTCTCTG  
GAAAAGAG--GCGCTTGCAGGGGGAC-----ATGATTACTCTGTACAAGTACATTAGAGGG---  
GATTATAGGCAGNTGGGGGATGTTCTTTTTTCCATAAAAACAATCAGCGCACCCAGAGG-  
TCACCCCTNTAGATTAGAGGAACG---  
GAGCTTCCATTTGAAGCAGCGTAGGTGGTTTTTTCACGGTGAGGGCAGTGAGGTTGTGGAATGCCCTTCCTA  
GTGATGTGGTAATGGCAGACTCTGTTAATG-  
CCTTTAAGAGGGGCCTGGATGAGTTTTTGTATGTGAGTGTATAGTGTGCTGGGTTTACT--CG-G---ATGGG-  
TTGAA-CTTGATGGAC--NATGGTCTTTTTTCAAC--CCTATG

>CR1\_1b\_Xt

GGGTNTCCTTAATGGAGAAGGATCT-  
AGGGGTTTTTGTGATAACAAGTTGTCTAATTCCAGGCAGTGTTCATTCTGTGGCTACTAAAGCAAATAAAG  
TGCTGTCTTGTATAAAAAAGGGCATTGACTCAAGGGATGAGAACATAATTTTGCCTCTTTATAGGTCCCTG  
GTAAGGCCTCACCTTGAGTATGCAGTGCAGTTTTGGGCTCCAGT--  
CCTTAAGAAGGATATTAATGAGCTGGAGAGAGTGCAGAGACGTGCAAC--  
TAAACTGGTAAAGGGGATGGAAGATTTAAACTATGAGGTTAGACTGTTCGAGGTTGGGGTTGTTTTCTCTG  
GAAAAGAG--GCGCTTGCAGGGGGAC-----ATGATTACTCTGTACAAGTACATTAGAGGG---  
GATTATAGGCAGATGGGGGATGTTCTTTTTTCCATAAAAACAATCAACGCACCCAGAGG-  
TCACCCCTTTAGATTAGAGGAACG---  
GAGCTTCCATTTGAAGCAGCGTAGGTGGTTTTTTCACGGTGAGGGCAGTGAGGTTGTGGAATGCCCTTCCTA  
GNGATGTGGTAATGGCAGATTCTGTTAATG-  
CCTTTAAGAGGGGCCTGGATGAGTTCTTGTATGTGAGTGTATAGTGTGCTGGGTTTACT--TG-G---ATGGG-  
TTGAA-CTTGATGGAC--ACTGGTCTTTTTTCAAC--CCTATG

>CR1\_AC\_1

ACAGCAGTGTGTGCGAAAAAGACCT-  
TGGAGTCCTCGTGGACAACAAGTTAAACATGAGCCAACAATGTGATGCGGCTGCTAAAAAAGCCAATGG  
GATTCTGGCCTGCATCAATAGGGGAATAGCGTCTAGATCCAGGGAAGTTATGCTCCCCCTCTATTCTGCCT  
TGGTCAGACCACACCTGGAATACTGTGTCCAATTTTGGGCACCACA--  
GTTGAAGGGAGATGTTGACAAGCTGGAAAGCGTCCAGAGGAGGGCGAC--  
TAAAATGATTAAGGGTCTGGAGAACAAGCCCTATGAGGAGCGGCTTAAAGAGCTGGGCATGTTTAGCCTG  
CAGAAGAG--AAGGCTGAGAGGAGAC-----ATGATAGCCATGTACAAATATGTGAAGGGA---  
AGTCATAGGGAAGAGGGAGCAAGCTTGTTTTCTGCTGCCCTGCAGACTAGGACACGGAA-  
CAATGGCTTCAAACACTACAGGAAAG---  
GAGATTCCACCTGAACATCAGGAAGAAGCTTCCCTCACTGTGAGAGCTGTTTCGACAGTGGAAGCTCTCTCCCC  
GGGGCYGTGGTGGAGGCTCCTTCCTTGGAGG-  
CTTTTAAGCAGAGGCTGGATGGCCATCTGTGCGGGGGTGCTTTGATTTCTGCTTCTTAG--CA-----GGGGG-  
TTGGA-CTAGATGGCC-CATGTGGTCTCTTCCAAC--TCTACT

>CR1\_Mam

CAGTTACGACCCAGGAAAGGGATCT-AGGAGTCATTGTAGACTATTCCCTGAAGACATCAGCCCAATGT---  
GCTGTAGCCAAAAAGGCCAACAAAATNCTGGGCATCATCAGGAAGGGNATTGGAAACAAAACAGAAAAC  
ATTATCCTACCTTTGTGCAAAACCATAGTATATCCACACCTGGAATACTGTGTGCAGTTCTGGTTGCCGCA  
NCCCTCAAGAAAGNCATANCAGAGCTGAGAAGGGTAAT-----TAAAATGATCAAGGAGATGGA-  
AGGCTTTNATAAGAGGCTGAGCTGNTTTGTTTAAAA--CTTTAGTCTGGAAAGACG--  
AAGGCTGAGAGGGGAT-----ATGATCAAAGTCTATAAAACCATGAAGGGT---  
ATGGATAAGGTGAACATAGACTT---GTTACCAAATCCCAGAATACTAGAAGTACTAGG---  
GCAGCCTTTGAAGCTTGAAAGAAATTTTAGGGACAAATNAAANAAAAGGTGTAGACTCATTNTACAGNG  
GG-----  
-----

>L3

GCAGCAGTTCACGTGAAAAAGACCT-  
AGGGGTTTTAGTTGACCACAAGCTCAATATGAGCCAACAGTGTGATGTGGCTGCCAAAAAAGCTAATGCA  
ATCTTAGGCTGCATTAATAGAAGTATAGTGTCCAGAWCAAGGGAGGTAATAGTCCCCTGTACTCTGCGC  
TGGTCAGACCACATCTGGAGTATTGCGTTCAGTTCTGGGCACCACA--  
TTTTAAGAGGGACATTGACAAACTGGAGCGCGTCCAGAGAAGAGTGAC--  
CAGGATGGTGAAGGGTCTGGAAACCATGTCATATGAGGAACGGTTGAAGGAACTGGGGATGTTTAGCCTG  
GAGAAGAG--AAGACTTAGAGGAGAC-----ATGATAGCTGTCTTCAAATATTTGAAGGGC---  
TGTCATGTGGAAGAGGGATTAGACTTATTCTGTGTGGCTCCAGAGGGCAGAACTAGGAT-  
CAGTGGGTGGAAGTTACAGGGAGG---  
CAGATTTAGCTCAATATAAGGAAGAAGCTTTCTAACAATCAGAGCTGTCCAAAAATGGAATGGGCTGCCT  
TGGGAGGTAGTGAGCTCCCTGTCACTGGAGG-  
TATCAAGCAGAGGCTGGATGACCACTTGTGAGGGATGTTGTAGATTCCCTGCAT-TGGA--TG-----GGAGN-  
TTGGA-CTAGATGACC-TCTAAGGTCCCTTCCAAC--TCTGAG

>L3b

-----  
-----  
AAAAGGATGTGGAGAANTTGGAGAGAGTTCAGAGGAGAGCNAC--  
AAAGATGATTAAGGGTTGGAAAATGGGACCTATGAGGAAAGGTTAAAGGAACTGGGATTATTCAGCCT  
GGAGAAGAG--AAGGCTGAGGGGNGAC-----TTAATAACAGTCTTCAAGTATATGAAGAGT---  
TATTACATAGAGGATGGTGACCAGCTGTTCTCCATCTCCACTGAGGACAGAAACAAGAGG-  
AAATGGGCTTAAATTGCAGCATGA---  
GGGATTTAGGTTAGATATAAGGAAGAATTTCTGACAGTGAGAGCTGTAAATACTGGAATGGGTTGCCG  
AGGGAGATTGTGGAATTTCTTCTCTGGAGAGNCTTTAAAAATAGAATGNATNCTCATCTGTCTGGGATG  
NTTA-AATCCTGCCCAAAGN--TNGGNGNANGGA-TTGGA-CTAGATGACCTCT-GAGGTCCTTTCCAAT--  
TCTGAG

>L3\_ME

ACAGCAGTTTGTCTGAAAAAGATCT-  
GGGGGTTTTAGTGGACTGCAAGCTCAATATGAGTCAGCAGTGTGATATGGCAGCCAAAAAAGCTAATGTA  
ATCTTGGGCTGCATTAAGAGAGGCATAGCTTCCAGGAATAAGGAGGTGATAGTCCCCTGTACTCTGCC



TGGTCAGACCACATCTGGAGTATTGTGTTTCAGTTCTGGGTACCACA--  
TTTTAGGAAGGACATTGATAAGCTGGAGAGTATCCAGAGGAGGGCAAC--  
CAGGATGGTGAAGGGCCTTGAGTTCATGCCATATGAGGATCAGTTGAAGGAACTGGGGATGTTTAGCCTG  
GAGAAGAG--AAGACTCAGGGGGGAC-----ATGATAGCTGTCTTCAAGTATTTGAAGGGC---  
TGTCATGTGGAAGAGGGATTAGACTTGTCTGTTTGGCCCCAGAGGGCAGAACTAGGAG-  
CAATGGGTGGAAGTTGCAAAGAGG---CAAATTTAGGCTTGATGTAAGGAAAAACTTCT---  
AATTAGAGCTGTCCAAAAGTGAATGGACTGCCTTAGAAGGTGGTGGGTTCCCTCTCACTGGAGG-  
TCTTCAAGCAGAGGCTGGATGACCACTTGTTCAGATATGTTTRTAGATTCTTT-----TGAG-GTATGGA-  
TTGGA-CTAGATGGYC-ACTGAGGTTCTTCCAAC--TCTAAA

>PlatCR1

CAGTCACGACTCAGGAAAGAGATCT-  
CGGAGTCATTGTTGACTGTTCTTTTAAATCATCGGTCCAATGTGCGGCAGCAGCCAAAAAGGCCAACCGA  
ATGCTGGGCATCATCAGGAAGGGGATAGAAAACGAAACAAAAGGCATAGTTTTGCCACTATATAAAACC  
ACGGTACGCCCGCACCTGGAATACCGCGTGCAGTTCTGGTCCCGCA--  
TCTTAGGAAGGACATAATAGAGCTGGAGAAGGTACAGAGAAGGGCAAC--  
CAAGATGATCGGGGGGATGGAGAAGCTTCCGTACGAGGATAGACTGAAAAGATTAGGACTCTTCAGTCTG  
GAAAGACG--AAGGCTGAGAGGGGAC-----ATGATTGAAGTCTACAAAATCATGAAGGGT---  
GTGGACAGGGCGAACACGGAATTGTTGTTACCAAATCCCACAACACCAGGACGAGGGG-  
GCACCCACTGAAGCTTGAAGGTGG---  
TAGGTTCAAAACAAACAAAAGGAAACACTTCTTCACACAGCGGGTGGTAAGCATATGGAATTCGTTACCA  
CAGGAAGTTGTGCAGGCCGAAAATATCAGTA-  
GGTTCAAGAGGGGTTTGGATAAATTCATGAGAGGGAAAGTTAGGGCCACTGTTCG-GAGA--CA-----  
GAATA-CTGGG-CTGGATGGAC--CATTGGTCTGACCCAGT--AATGGC

>PlatCR1\_old1

-----  
-----

-----  
GTCGGAGAGGCGGAGAAGCTTCCGNACGAGGACGGACCGAAAGGGTTCGGGACTCTGCGGNCCGGAGAG  
ACG--CGGGCCGAGAGGGGAC-----AGGACTGGAGTTTACGGAACCGCGAAGGGG---  
GCGGACAGGGCGAACACGGAATTGCCGTTCCCAAATCCCAGCCACCAGGACGAGGGG-  
GCACCCGCTGGAGCTGGAGGGCGG---  
CAGGTTCAAAACAAACGNAAGGAAACACTTCTTCNCCCAGCGGGGGGTGAGCACGTGGAATCCGTTCCCA  
CAGGGAGCCGTGCA-GCCGGAAACACCGGCA-  
GGTTCGAGAGGGGTTTGGATAGATCCATGGGAGGGAGAGTCAGGGCCGCTGTTCG-GAGA--CA-----  
GAGTC-CTGGG-CCGGATGGGC--CGCGGGGCTGACCCGGG--AATGGC

>PlatCR1\_old2

-----  
-----

-----  
ATCGGGGGAATGGAGAAGCTTCCGTAGGAGGAGAGACCGAAAGGATTAGGACTCTTCAGTCTGGAAAGA  
CG--CAGGCCGAGAGGGGAC-----GGGATTGAAGTTTACAGAATCATGAAGGGN---  
GCGGGCAGGGCGAACACGGAATTGTCGTTNCCAAATCCCACGCCACCAGGACGAGGGG-  
GCACCCACTGAAGCTTGAAGGTGG---  
CAGGTTCAAAACAAACGAAAGGAAACGCTTCTTCACCCAGCGGGCGGTAAGCGTATGGAATTCGTTNCCA  
CGGGAAGTTGTGCAGGCCGAAAATATCAGCA-GGTTCAAGAGGGGTTTGGATAGATTCCGCGAGAGGG-----  
----GCCGCCGTCG-GAGA--CA-----GAATC-CTGGG-CCGGACGGAC--CGCGGGTCCGACCCAGT--AATGGC

>Plat\_L3

GCACAAGTACAGCAGAAAAAGACCT-  
GGGGGTCATAGTCGACCANAAGCTGAATATGAGTCAGCAATGTAGTGCCGTTATTAATAAAAGCCAACCGG  
GTAAGTGGGATGTATTAACAGGAGTATGACATGCAAGAGTCGGGAAGTAATCCTTCCGCTATACTCTGCAC  
TGGTCAGACCCTTATTAGAGTACCGTGTCCAGTTTTGGTCCCGCA--  
CTTTAAAAAGGATGTGGAGAACTGGAGAGGGTCCAGAGAAGAGCGAC--  
AAAAATGATTAAGGGATGGAAAATAGGTCCTATGAGGAAAGGTTAAAGGAATTGGGGTTGTTTAGCCT  
GGAGAAGAG--AAGGCTAAGGGGTGAC-----TTAATAACTGTCTTCAAGTATATGAAGGGT---

TTTTATGGGGAGGACGCTGACCAGTTGTTCTCCGTGTCCACNGAGGACCGAACAAAGAGG-  
AAATGGGCTTAAATTAAGCAGGA---  
GAGATTTTCGGTTGGACATAAGGAAGAAGCTTCTTGACCGTCGGGGTGATAAAACACTGGAACGGGCTACCG  
AGGGAGGTTGTGGAGTCTCCATCCCTGGAGA-  
TCTTTAAGAAAAGAATAGACGNCCATCTGTCCTGGATGGTTTAGTACCTGCCTGGAGG--CA-----GGGGG-  
CTGGA-CCAGATGACCTCTCGAGGTCCCTTCCAGC--TCTANG

>Plat\_L3b

GCGCGAGTACGGCAGAAAAAGATCT-  
AGGGGTCATAGTGGACCACAAGCTGAACGCGAGTCAGCAATGTAGCGCCGTTGTTAAAAAAGCNAACGC  
GATACCGGGATGCATNAATAGGAGTATAGCATGTAGGAACCGCGAGGTAATCCTCCCGTTATACTCAGCG  
CTGGTCAGACCCTTACTAGAGTACTGCGTCCAGTTCTGGGCTCCGCA--  
ACTTAAGAGGGACGTGGAGAAGTTGGAGAGGGTTCAGAGGAGAGCCAC--  
GAAGATGATTAAGGGTTGGAAAATAAGACCTATGAGGAAAGGTTAAAGGAACTGGGATTATTTAGCCT  
GGAGAAGAG--AAGGCTGAGGGGCGAC-----TTAATAACGGTCTTCAAGTATATGAAGGGT---  
TATTATACGGAGGACGGTGACCAGCTGTTCTCCATCTCCACTGAGGACAGAACAAGAGG-  
AAATGGGCTTAAACTGCAGCANGA---  
GGGATTTAGGTTAGACATAAGGAAGAAGCTTCCCGACAGCGAGGGTTGTTAAACACTGGAACGGGTTACCG  
AGGGAGGTTGTGGAATCTCCTTCCCTGGAGA-  
TCTTTAAAAACAGGATAGATNCTCATCTGTCTGGGATGGTTTAGGGTCCTGCCTGGAGG--CA-----GGGGG-  
ATGGA-CTAGATGACCTCTCGAGGTCCCTTCCAGC--CCTANG

>PSLINE

GCAGCAGTTCTGCAGAAAAGGATCT-  
GGGGGTTACAGTGGATAAGAAGCTGGATATGAGTCAACAGTGTGCCCTGGTTGCCAAGAAGGCTAATGGC  
ATATTGGGCTGCATTAGTAAGAGCATTGCCAGCAGATCGAGGGAAGTGATTATTYCCCTSTATTCGGCATT  
GGTGAGGCCGCATTTGGAGTATTGTGTCCAGTTTTGGGCCCCCA--  
CTACAAAAGGATGTGGAMAAGTTGGAGAGAGTCCAGCGGAGGGCAAC--  
AAAAATGATWAGGGGGCTGGARCACAAGACTTATGAGGAGAGGCTGAAGGAACTRGGCCTGTTTAGTCT  
GCAGAAGAG--AGAATGAGGGGGGAT-----TTGATAGCAGCCTTTAACTACCTGAAAGGG---  
GGTTCAGGGAGGATGGAGCTAGGCTGTTYTCAGTGGTGGCAGATGACAGAACAAGGAG-  
CAATGGTCTCAAGTTGCAGTGGGG---  
GAGGTCTAGGTTGGACATTAGGAAAAAGTTTTTCACTAGGAGGGTGGTGAAGCATTGGAATGGGTTACCT  
AGGGAGGTGGTGGCATCTCCATCTTTAGAGG-  
TTTTTAAGCTGCGGCTTGACAAAACCCTCGCTGGGATGATTTAGRGTCCTGCTT-TGAG--CA-----GGGGG-  
TTGGA-CTAGATGACCTCCTGAGGTCCCTTCCAAC--TCTAAT
